# Supplementary material for: Biomimetic synthesis of dispiro sesquiterpene lactone type alkaloids and discovery of potential anticancer scaffolds
Source: Royal Society of Chemistry journal article supplement (doi:10.1039/d5nj04317d), 2026-01-01

## **Biomimetic synthesis of dispiro sesquiterpene lactone type of alkaloids and discovery of potential anticancer scaffolds**

Dong-Gui Guo,<sup>‡a</sup> Sijie Zhang,<sup>‡b</sup> Lin-Lu Liu,<sup>‡a</sup> Hong-Xing Cen,<sup>a</sup> Xiong-Li Liu,<sup>\*a</sup> Hui-Juan Wang,<sup>a</sup>  
and Li-Jun Peng<sup>\*a</sup>

<sup>a</sup> Key laboratory of Plant Resource Conservation and Germplasm Innovation in Mountainous Region (Ministry of Education), College of Life Sciences/Institute of Agro-bioengineering, Guizhou University, Guiyang 550025, Guizhou Province, China.

<sup>b</sup> Academy of Chinese Medical Sciences, Hunan University of Chinese Medicine, Changsha, 410208, Hunan, China.

<sup>‡</sup> These authors contributed equally to this work.

\*E-mail address: xlliu1@gzu.edu.cn (X.-L. Liu) and ljpeng@gzu.edu.cn (L.-J. Peng)

### **Table of Contents**

|                                                                                                                |     |
|----------------------------------------------------------------------------------------------------------------|-----|
| 1. General information.....                                                                                    | S2  |
| 2. Synthesis of dispiro sesquiterpene lactone type of alkaloids <b>3</b> and <b>5</b> .....                    | S2  |
| 3. X-ray crystal data for compound <b>3b</b> .....                                                             | S18 |
| 4. MTT assay.....                                                                                              | S19 |
| 5. Cytomorphologic analysis.....                                                                               | S19 |
| 6. AO/EB staining analysis.....                                                                                | S19 |
| 7. Apoptosis analysis.....                                                                                     | S19 |
| 8. Mitochondrial membrane potential analysis.....                                                              | S20 |
| 9. DCFH-DA reactive oxygen species assessment.....                                                             | S20 |
| 10. Apoptosis detection by flow cytometry.....                                                                 | S20 |
| 11. Cycles detected by flow cytometry.....                                                                     | S21 |
| 12. Western blot analysis.....                                                                                 | S21 |
| 13. The copies of <sup>1</sup> H NMR and <sup>13</sup> C NMR spectra for compounds <b>3</b> and <b>5</b> ..... | S22 |

## 1. General information

Reactions were monitored by thin layer chromatography using UV light to visualize the course of reaction. Purification of reaction products was carried out by flash chromatography on silica gel or just by simple filtration and washing.  $^1\text{H}$  and  $^{13}\text{C}$  NMR spectra were obtained using a Bruker DPX-400 spectrometer.  $^1\text{H}$  NMR chemical shifts are reported in ppm ( $\delta$ ) relative to tetramethylsilane (TMS) with the solvent resonance employed as the internal standard. Data are reported as follows: chemical shift, multiplicity (s = singlet, d = doublet, t = triplet, m = multiplet), coupling constants (Hz) and integration.  $^{13}\text{C}$  NMR chemical shifts are reported in ppm ( $\delta$ ) from tetramethylsilane (TMS) with the solvent resonance as the internal standard. Melting points were measured on an electrothermal digital melting point apparatus.

All cell lines were purchased from the Chinese Academy of Sciences, Kunming Cell Bank. All of which were cultured in RPMI-1640 or DMEM medium (Gibco, USA) supplemented with 10% foetal bovine serum, 1% glutamine, 100 U/mL penicillin and 100  $\mu\text{g/mL}$  streptomycin in a humidified atmosphere with 5%  $\text{CO}_2$  at  $37^\circ\text{C}$ . The synthetic compounds were placed at  $-20^\circ\text{C}$  after dissolved in DMSO. Cisplatin purchased from Aladdin Company.

## 2. Synthesis of dispiro sesquiterpene lactone type of alkaloids **3** and **5**

In a sealed tube equipped with a magnetic stirring bar, a mixture of 0.3 mmol of compound **1** (1.5 eq), 0.2 mmol of compound **2**, 0.5 mmol of proline (2.5 eq) in 2.0 mL of  $\text{CH}_3\text{CN}$  was stirred at  $80^\circ\text{C}$  for 3 h, and then was purified by flash chromatography to give the desired intermediate **B**. Then, a mixture of intermediate **B**, *m*-CPBA (2.2 eq) in 2.0 mL of  $\text{CHCl}_3$  was stirred at rt for 30 min, and then was directly loaded onto a silica gel and purified by flash chromatography to give the desired product **3** or **5**, using MeOH/EtOAc (1/20, v/v) as the eluent.

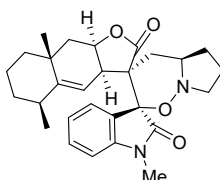

(3*S*,3'*R*,3*a''R*,4*a'R*,5''*S*,8*a''R*,9*a''R*)-1,5'',8*a''*-trimethyl-3*a''*,4*a'*,5'',5'',6'',6'',7'',7'',8'',8*a''*,9'',9*a''*-dodecahydro-2''*H*,4'*H*-dispiro[indoline-3,2'-pyrrolo[1,2-*b*][1,2]oxazine-3',3''-naphtho[2,3-*b*]furan]-2,2''-dione (**3a**): Light yellow solid,

m.p. 127.5-128.8 °C, overall yield 42% (38.8 mg), >20:1 dr; <sup>1</sup>H NMR (CDCl<sub>3</sub>, 400 MHz) δ: 1.02-1.05 (m, 6H), 1.16-1.20 (m, 1H), 1.31-1.38 (m, 2H), 1.44-1.49 (m, 3H), 1.68-1.91 (m, 6H), 2.23-2.31 (m, 2H), 2.43-2.47 (m, 1H), 2.71-2.73 (m, 1H), 2.87-2.91 (m, 1H), 3.08 (s, 3H), 3.14-3.18 (m, 1H), 4.01-4.07 (m, 1H), 4.43 (s, 1H), 5.21 (d, *J* = 3.6 Hz, 1H), 6.69 (d, *J* = 7.6 Hz, 1H), 6.97-7.01 (m, 1H), 7.21-7.26 (m, 1H), 7.80 (s, 1H); <sup>13</sup>C NMR (CDCl<sub>3</sub>, 100 MHz) δ: 15.7, 18.2, 22.2, 25.5, 27.4, 29.6, 31.2, 31.7, 37.2, 37.8, 40.8, 42.3, 52.4, 60.3, 72.5, 80.7, 107.2, 116.0, 121.6, 126.1, 127.9, 129.1, 141.8, 149.8, 171.9, 174.6; HRMS (ESI-TOF) *m/z*: Calcd. for C<sub>28</sub>H<sub>34</sub>N<sub>2</sub>NaO<sub>4</sub> [M+Na]<sup>+</sup>: 485.2411; Found: 485.2415.

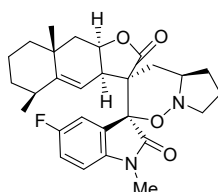

**(3*S*,3'*R*,3*a''R*,4*a'R*,5''*S*,8*a''R*,9*a''R*)-5-fluoro-1,5'',8*a''*-trimethyl-3*a''*,4*a'*,5',5'',6',6'',7',7'',8'',8*a''*,9'',9*a''*-dodecahydro-2''*H*,4'*H*-dispiro[indoline-3,2'-pyrrolo[1,2-*b*][1,2]oxazine-3',3''-naphtho[2,3-*b*]furan]-2,2''-dione (3b)**: Light yellow solid, m.p. 130.5-131.4 °C, overall yield 40% (38.4 mg), >20:1 dr; <sup>1</sup>H NMR (CDCl<sub>3</sub>, 400 MHz) δ: 1.01-1.05 (m, 6H), 1.16-1.23 (m, 1H), 1.33-1.38 (m, 2H), 1.45-1.49 (m, 3H), 1.65-1.97 (m, 6H), 2.18-2.24 (m, 1H), 2.28-2.34 (m, 1H), 2.44-2.47 (m, 1H), 2.65-2.72 (m, 1H), 2.78 (s, 1H), 3.07 (s, 3H), 3.14-3.18 (m, 1H), 4.15-4.19 (m, 1H), 4.54 (s, 1H), 5.19 (d, *J* = 4.0 Hz, 1H), 6.60-6.63 (m, 1H), 6.92-6.97 (m, 1H), 7.65 (s, 1H); <sup>13</sup>C NMR (CDCl<sub>3</sub>, 100 MHz) δ: 15.7, 17.5, 22.2, 25.1, 25.7, 27.4, 30.0, 31.2, 31.7, 37.2, 40.8, 42.3, 51.8, 53.0, 60.0, 80.9, 107.5 (d, *J*<sub>CF</sub> = 6.3 Hz), 115.1 (d, *J*<sub>CF</sub> = 24.2 Hz), 116.1, 116.9 (d, *J*<sub>CF</sub> = 20.3 Hz), 127.9 (d, *J*<sub>CF</sub> = 9.1 Hz), 137.7, 150.0, 157.8 (d, *J*<sub>CF</sub> = 239.4 Hz), 171.6, 174.3; <sup>19</sup>F NMR (CDCl<sub>3</sub>, 470 MHz) δ: -119.71; HRMS (ESI-TOF) *m/z*: Calcd. for C<sub>28</sub>H<sub>33</sub>FN<sub>2</sub>NaO<sub>4</sub> [M+Na]<sup>+</sup>: 503.2317; Found: 503.2325.

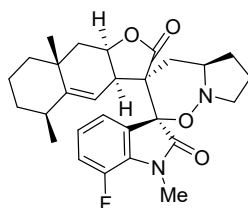

**(3*S*,3'*R*,3*a''R*,4*a'R*,5''*S*,8*a''R*,9*a''R*)-7-fluoro-1,5'',8*a''*-trimethyl-**

**3a'',4a',5',5'',6',6'',7',7'',8'',8a'',9'',9a''-dodecahydro-2''H,4'H-dispiro[indoline-3,2'-pyrrolo[1,2-b][1,2]oxazine-3',3''-naphtho[2,3-b]furan]-2,2''-dione (3c):** Light yellow solid, m.p. 129.8-131.0 °C, overall yield 39% (37.4 mg), >20:1 dr; <sup>1</sup>H NMR (CDCl<sub>3</sub>, 400 MHz) δ: 1.02-1.05 (m, 6H), 1.16-1.20 (m, 1H), 1.32-1.41 (m, 2H), 1.45-1.49 (m, 3H), 1.69-1.92 (m, 6H), 2.23-2.29 (m, 2H), 2.43-2.47 (m, 1H), 2.70-2.73 (m, 1H), 2.81-2.88 (m, 1H), 3.14-3.18 (m, 1H), 3.30 (d, *J* = 2.8 Hz, 3H), 3.95-4.07 (m, 1H), 4.43 (s, 1H), 5.19 (d, *J* = 3.6 Hz, 1H), 6.90-7.01 (m, 2H), 7.63-7.64 (m, 1H); <sup>13</sup>C NMR (CDCl<sub>3</sub>, 100 MHz) δ: 15.7, 17.9, 22.2, 25.4, 27.3, 28.0, 28.1, 31.2, 31.7, 37.3, 37.7, 40.8, 42.2, 52.7, 60.2, 75.1, 75.6, 80.6, 115.9, 117.0 (d, *J*<sub>CF</sub> = 19.6 Hz), 122.0 (d, *J*<sub>CF</sub> = 2.4 Hz), 124.2 (d, *J*<sub>CF</sub> = 8.3 Hz), 128.6 (d, *J*<sub>CF</sub> = 22.1 Hz), 145.3, 147.8, 150.0, 171.5, 174.4; <sup>19</sup>F NMR (CDCl<sub>3</sub>, 470 MHz) δ: -132.91; HRMS (ESI-TOF) *m/z*: Calcd. for C<sub>28</sub>H<sub>33</sub>FN<sub>2</sub>NaO<sub>4</sub> [M+Na]<sup>+</sup>: 503.2317; Found: 503.2314.

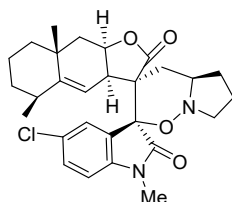

**(3S,3'R,3a''R,4a'R,5''S,8a''R,9a''R)-5-chloro-1,5'',8a''-trimethyl-3a'',4a',5',5'',6',6'',7',7'',8'',8a'',9'',9a''-dodecahydro-2''H,4'H-dispiro[indoline-3,2'-pyrrolo[1,2-b][1,2]oxazine-3',3''-naphtho[2,3-b]furan]-2,2''-dione (3d):** Light yellow solid, m.p. 145.0-146.6 °C, overall yield 43% (42.7 mg), >20:1 dr; <sup>1</sup>H NMR (CDCl<sub>3</sub>, 400 MHz) δ: 1.01-1.05 (m, 6H), 1.16-1.20 (m, 1H), 1.33-1.51 (m, 5H), 1.69-1.94 (m, 6H), 2.19-2.34 (m, 2H), 2.44-2.47 (m, 1H), 2.65-2.72 (m, 1H), 2.77-2.82 (m, 1H), 3.07 (s, 3H), 3.14-3.19 (m, 1H), 4.02-4.12 (m, 1H), 4.51 (s, 1H), 5.19 (d, *J* = 3.6 Hz, 1H), 7.21-7.23 (m, 1H), 7.84 (s, 1H); <sup>13</sup>C NMR (CDCl<sub>3</sub>, 100 MHz) δ: 15.7, 17.5, 22.2, 25.2, 25.7, 27.3, 29.9, 31.2, 31.7, 37.2, 40.8, 42.3, 52.1, 60.1, 75.8, 80.8, 108.1, 116.0, 126.9, 127.8, 128.8, 140.3, 150.1, 171.5, 174.3; HRMS (ESI-TOF) *m/z*: Calcd. for C<sub>28</sub>H<sub>33</sub>ClN<sub>2</sub>NaO<sub>4</sub> [M+Na]<sup>+</sup>: 519.2021; Found: 519.2026.

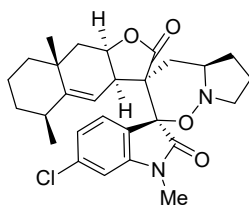

**(3S,3'R,3a''R,4a'R,5''S,8a''R,9a''R)-6-chloro-1,5'',8a''-trimethyl-**

**3a'',4a',5',5'',6',6'',7',7'',8'',8a'',9'',9a''-dodecahydro-2''H,4'H-dispiro[indoline-3,2'-pyrrolo[1,2-b][1,2]oxazine-3',3''-naphtho[2,3-b]furan]-2,2''-dione (3e):** Light yellow solid, m.p. 151.5-152.3 °C, overall yield 41% (40.7 mg), >20:1 dr; <sup>1</sup>H NMR (CDCl<sub>3</sub>, 400 MHz) δ: 1.02-1.06 (m, 6H), 1.17-1.18 (m, 1H), 1.33-1.37 (m, 2H), 1.45-1.49 (m, 3H), 1.65-1.92 (m, 6H), 2.23-2.28 (m, 2H), 2.43-2.47 (m, 1H), 2.69-2.71 (m, 1H), 2.82-2.89 (m, 1H), 3.08 (s, 3H), 3.12-3.17 (m, 1H), 3.92-4.05 (m, 1H), 4.47 (s, 1H), 5.19 (d, *J* = 4.0 Hz, 1H), 6.71 (d, *J* = 2.0 Hz, 1H), 6.95-6.98 (m, 1H), 7.74 (s, 1H); <sup>13</sup>C NMR (CDCl<sub>3</sub>, 100 MHz) δ: 15.7, 18.1, 22.2, 25.3, 25.6, 27.4, 30.1, 31.2, 31.7, 37.2, 37.7, 40.8, 42.2, 52.6, 61.2, 73.6, 80.5, 108.0, 115.9, 121.5, 124.7, 129.1, 135.0, 142.9, 150.0, 171.8, 174.4; HRMS (ESI-TOF) *m/z*: Calcd. for C<sub>28</sub>H<sub>33</sub>ClN<sub>2</sub>NaO<sub>4</sub> [M+Na]<sup>+</sup>: 519.2021; Found: 519.2015.

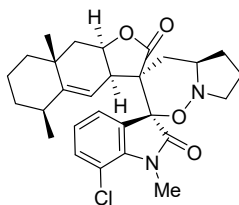

**(3S,3'R,3a''R,4a'R,5''S,8a''R,9a''R)-7-chloro-1,5'',8a''-trimethyl-3a'',4a',5',5'',6',6'',7',7'',8'',8a'',9'',9a''-dodecahydro-2''H,4'H-dispiro[indoline-3,2'-pyrrolo[1,2-b][1,2]oxazine-3',3''-naphtho[2,3-b]furan]-2,2''-dione (3f):** Light yellow solid, m.p. 131.1-131.8 °C, overall yield 42% (41.7 mg), >20:1 dr; <sup>1</sup>H NMR (CDCl<sub>3</sub>, 400 MHz) δ: 1.02-1.05 (m, 6H), 1.16-1.21 (m, 1H), 1.31-1.39 (m, 2H), 1.45-1.49 (m, 3H), 1.67-1.91 (m, 6H), 2.22-2.26 (m, 2H), 2.42-2.46 (m, 1H), 2.72-2.74 (m, 1H), 2.87 (s, 1H), 3.13-3.17 (m, 1H), 3.47 (s, 3H), 3.95-4.06 (m, 1H), 4.36 (s, 1H), 5.18 (d, *J* = 4.0 Hz, 1H), 6.88-6.92 (m, 1H), 7.16-7.18 (m, 1H), 7.75 (s, 1H); <sup>13</sup>C NMR (CDCl<sub>3</sub>, 100 MHz) δ: 15.7, 18.3, 22.2, 25.5, 27.3, 29.0, 31.2, 31.7, 37.2, 38.1, 40.8, 42.2, 52.5, 60.2, 75.5, 79.9, 114.5, 115.8, 122.3, 126.7, 128.8, 131.4, 137.7, 149.9, 172.1, 174.3; HRMS (ESI-TOF) *m/z*: Calcd. for C<sub>28</sub>H<sub>33</sub>ClN<sub>2</sub>NaO<sub>4</sub> [M+Na]<sup>+</sup>: 519.2021; Found: 519.2023.

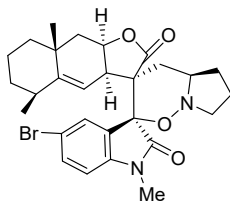

**(3S,3'R,3a''R,4a'R,5''S,8a''R,9a''R)-5-bromo-1,5'',8a''-trimethyl-3a'',4a',5',5'',6',6'',7',7'',8'',8a'',9'',9a''-dodecahydro-2''H,4'H-dispiro[indoline-3,2'-**

**pyrrolo[1,2-b][1,2]oxazine-3',3''-naphtho[2,3-b]furan]-2,2''-dione (3g):** Light yellow solid, m.p. 147.5-148.3 °C, overall yield 40% (43.2 mg), >20:1 dr; <sup>1</sup>H NMR (CDCl<sub>3</sub>, 400 MHz)  $\delta$ : 1.01-1.05 (m, 6H), 1.17-1.20 (m, 1H), 1.32-1.41 (m, 2H), 1.45-1.49 (m, 3H), 1.66-1.94 (m, 6H), 2.19-2.33 (m, 2H), 2.43-2.47 (m, 1H), 2.66-2.72 (m, 1H), 2.79 (s, 1H), 3.06 (s, 3H), 3.15-3.20 (m, 1H), 4.04-4.10 (m, 1H), 4.50 (s, 1H), 5.18 (d, *J* = 3.6 Hz, 1H), 6.57 (d, *J* = 8.4 Hz, 1H), 7.36-7.38 (m, 1H), 7.97 (s, 1H); <sup>13</sup>C NMR (CDCl<sub>3</sub>, 100 MHz)  $\delta$ : 15.7, 17.8, 22.2, 25.2, 25.6, 27.3, 30.1, 31.2, 31.7, 37.2, 37.4, 40.8, 42.3, 52.1, 52.8, 60.1, 75.7, 80.8, 108.6, 114.4, 116.0, 128.2, 131.4, 131.8, 140.7, 150.1, 171.4, 174.2; HRMS (ESI-TOF) *m/z*: Calcd. for C<sub>28</sub>H<sub>33</sub>BrN<sub>2</sub>NaO<sub>4</sub> [M+Na]<sup>+</sup>: 563.1516; Found: 563.1512.

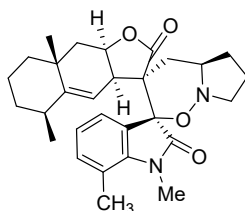

**(3S,3'R,3a''R,4a'R,5''S,8a''R,9a''R)-1,5'',7,8a''-tetramethyl-3a'',4a',5'',5'',6',6'',7',7'',8'',8a'',9'',9a''-dodecahydro-2''H,4'H-dispiro[indoline-3,2'-pyrrolo[1,2-b][1,2]oxazine-3',3''-naphtho[2,3-b]furan]-2,2''-dione (3h):** Light yellow solid, m.p. 131.2-131.9 °C, overall yield 43% (40.9 mg), >20:1 dr; <sup>1</sup>H NMR (CDCl<sub>3</sub>, 400 MHz)  $\delta$ : 1.03-1.05 (m, 3H), 1.16-1.20 (m, 1H), 1.32-1.37 (m, 2H), 1.44-1.48 (m, 3H), 1.65-1.86 (m, 6H), 2.23-2.27 (m, 2H), 2.44 (s, 3H), 2.73-2.75 (m, 1H), 2.87-2.90 (m, 1H), 3.14-3.18 (m, 1H), 3.29-3.37 (m, 4H), 3.91-4.07 (m, 1H), 4.31 (s, 1H), 5.20 (d, *J* = 3.6 Hz, 1H), 6.85-6.89 (m, 1H), 6.97 (d, *J* = 8.0 Hz, 1H), 7.65 (s, 1H); <sup>13</sup>C NMR (CDCl<sub>3</sub>, 100 MHz)  $\delta$ : 15.7, 18.3, 18.9, 22.2, 25.7, 27.3, 28.9, 31.2, 31.7, 37.3, 38.4, 40.9, 42.2, 52.3, 60.3, 75.4, 79.9, 116.0, 118.5, 121.5, 125.7, 126.7, 133.0, 139.6, 149.7, 172.7, 174.7; HRMS (ESI-TOF) *m/z*: Calcd. for C<sub>29</sub>H<sub>36</sub>N<sub>2</sub>NaO<sub>4</sub> [M+Na]<sup>+</sup>: 499.2567; Found: 499.2573.

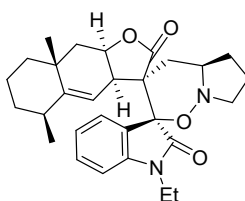

**(3S,3'R,3a''R,4a'R,5''S,8a''R,9a''R)-1-ethyl-5'',8a''-dimethyl-**

**3a'',4a',5',5'',6',6'',7',7'',8'',8a'',9'',9a''-dodecahydro-2''H,4'H-dispiro[indoline-3,2'-pyrrolo[1,2-b][1,2]oxazine-3',3''-naphtho[2,3-b]furan]-2,2''-dione (3i):** Light yellow solid, m.p. 127.6-128.3 °C, overall yield 41% (39.0 mg), >20:1 dr; <sup>1</sup>H NMR (CDCl<sub>3</sub>, 400 MHz) δ: 1.02-1.05 (m, 7H), 1.15-1.19 (m, 3H), 1.32-1.40 (m, 2H), 1.44-1.51 (m, 3H), 1.69-1.92 (m, 6H), 2.23-2.33 (m, 2H), 2.43-2.47 (m, 1H), 2.70-2.72 (m, 1H), 2.81-2.88 (m, 1H), 3.15-3.19 (m, 1H), 3.51-3.56 (m, 1H), 3.73-3.78 (m, 1H), 4.00-4.06 (m, 1H), 4.48 (s, 1H), 5.21 (d, *J* = 4.0 Hz, 1H), 6.71 (d, *J* = 8.0 Hz, 1H), 6.97-7.01 (m, 1H), 7.22-7.26 (m, 1H), 7.85 (s, 1H); <sup>13</sup>C NMR (CDCl<sub>3</sub>, 100 MHz) δ: 11.4, 15.7, 18.1, 22.2, 25.4, 27.3, 29.6, 31.2, 31.7, 33.9, 37.2, 37.7, 40.8, 42.3, 52.7, 60.2, 75.6, 80.7, 107.2, 116.2, 121.4, 126.5, 129.0, 140.7, 149.8, 171.5, 174.6; HRMS (ESI-TOF) *m/z*: Calcd. for C<sub>29</sub>H<sub>36</sub>N<sub>2</sub>NaO<sub>4</sub> [*M*+Na]<sup>+</sup>: 499.2567; Found: 499.2563.

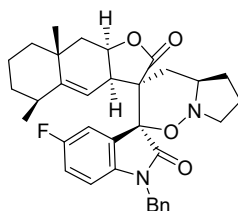

**(3*S*,3'*R*,3a''*R*,4a'*R*,5''*S*,8a''*R*,9a''*R*)-1-benzyl-5-fluoro-5'',8a''-dimethyl-3a'',4a',5',5'',6',6'',7',7'',8'',8a'',9'',9a''-dodecahydro-2''H,4'H-dispiro[indoline-3,2'-pyrrolo[1,2-b][1,2]oxazine-3',3''-naphtho[2,3-b]furan]-2,2''-dione (3j):** Light yellow solid, m.p. 128.3-129.8 °C, overall yield 36% (40.0 mg), 16:1 dr; <sup>1</sup>H NMR (CDCl<sub>3</sub>, 400 MHz) δ: 1.02-1.05 (m, 6H), 1.16-1.21 (m, 1H), 1.33-1.36 (m, 2H), 1.44-1.49 (m, 3H), 1.65-1.83 (m, 5H), 1.92-1.99 (m, 1H), 2.18-2.23 (m, 1H), 2.32-2.38 (m, 1H), 2.44-2.47 (m, 1H), 2.66-2.73 (m, 1H), 2.79 (s, 1H), 3.16-3.20 (m, 1H), 4.19 (s, 1H), 4.48 (s, 1H), 4.57 (d, *J* = 16.0 Hz, 1H), 4.96 (d, *J* = 16.0 Hz, 1H), 5.20 (d, *J* = 4.0 Hz, 1H), 6.46-6.49 (m, 1H), 6.80-6.85 (m, 1H), 7.15-7.27 (m, 5H), 7.67 (s, 1H); <sup>13</sup>C NMR (CDCl<sub>3</sub>, 100 MHz) δ: 15.7, 17.7, 22.3, 25.2, 27.4, 30.2, 31.2, 31.7, 37.2, 40.8, 42.2, 43.3, 51.9, 60.1, 75.7, 80.9, 108.6 (d, *J*<sub>CF</sub> = 8.2 Hz), 115.1 (d, *J*<sub>CF</sub> = 24.1 Hz), 116.1, 117.1, 125.8, 126.7, 127.8, 127.9, 133.7, 136.9, 150.0, 157.8 (d, *J*<sub>CF</sub> = 239.4 Hz), 171.8, 174.3; <sup>19</sup>F NMR (CDCl<sub>3</sub>, 470 MHz) δ: -119.30; HRMS (ESI-TOF) *m/z*: Calcd. for C<sub>34</sub>H<sub>37</sub>FN<sub>2</sub>NaO<sub>4</sub> [*M*+Na]<sup>+</sup>: 579.2630; Found: 579.2636.

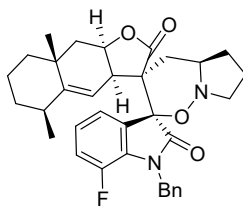

**(3S,3'R,3a''R,4a'R,5''S,8a''R,9a''R)-1-benzyl-7-fluoro-5'',8a''-dimethyl-3a'',4a',5',5'',6',6'',7',7'',8'',8a'',9'',9a''-dodecahydro-2''H,4'H-dispiro[indoline-3,2'-pyrrolo[1,2-b][1,2]oxazine-3',3''-naphtho[2,3-b]furan]-2,2''-dione (3k):** Light yellow solid, m.p. 130.7-131.2 °C, overall yield 39% (43.4 mg), 14:1 dr;  $^1\text{H}$  NMR ( $\text{CDCl}_3$ , 400 MHz)  $\delta$ : 1.01-1.05 (m, 6H), 1.16-1.18 (m, 1H), 1.29-1.35 (m, 2H), 1.42-1.49 (m, 3H), 1.68-1.92 (m, 6H), 2.23-2.30 (m, 2H), 2.42-2.46 (m, 1H), 2.72-2.75 (m, 1H), 2.86 (s, 1H), 3.16-3.20 (m, 1H), 3.95-4.00 (m, 1H), 4.16-4.23 (m, 1H), 4.91-5.00 (m, 2H), 5.18 (d,  $J = 3.2$  Hz, 1H), 6.91-6.95 (m, 2H), 7.17-7.24 (m, 5H), 7.65 (s, 1H);  $^{13}\text{C}$  NMR ( $\text{CDCl}_3$ , 100 MHz)  $\delta$ : 15.7, 18.7, 22.2, 25.4, 27.3, 29.5, 31.2, 31.7, 37.3, 37.8, 40.8, 42.1, 44.7, 44.8, 52.7, 60.2, 75.4, 80.5, 115.9, 117.1 (d,  $J_{\text{CF}} = 20.2$  Hz), 122.2 (d,  $J_{\text{CF}} = 6.3$  Hz), 126.3, 126.6, 126.8, 127.6, 127.7, 127.8 (d,  $J_{\text{CF}} = 10.1$  Hz), 135.2, 146.5 (d,  $J_{\text{CF}} = 242.4$  Hz), 150.0, 171.6, 174.5;  $^{19}\text{F}$  NMR ( $\text{CDCl}_3$ , 470 MHz)  $\delta$ : -135.77; HRMS (ESI-TOF)  $m/z$ : Calcd. for  $\text{C}_{34}\text{H}_{37}\text{FN}_2\text{NaO}_4$   $[\text{M}+\text{Na}]^+$ : 579.2630; Found: 579.2635.

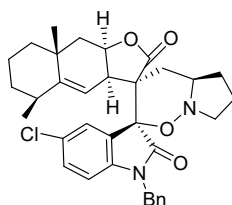

**(3S,3'R,3a''R,4a'R,5''S,8a''R,9a''R)-1-benzyl-5-chloro-5'',8a''-dimethyl-3a'',4a',5',5'',6',6'',7',7'',8'',8a'',9'',9a''-dodecahydro-2''H,4'H-dispiro[indoline-3,2'-pyrrolo[1,2-b][1,2]oxazine-3',3''-naphtho[2,3-b]furan]-2,2''-dione (3l):** Light yellow solid, m.p. 133.9-135.0 °C, overall yield 43% (49.2 mg), >20:1 dr;  $^1\text{H}$  NMR ( $\text{CDCl}_3$ , 400 MHz)  $\delta$ : 1.02-1.05 (m, 6H), 1.17-1.21 (m, 1H), 1.32-1.35 (m, 2H), 1.43-1.49 (m, 3H), 1.65-1.82 (m, 5H), 1.90-1.96 (m, 1H), 2.18-2.23 (m, 1H), 2.32-2.38 (m, 1H), 2.43-2.47 (m, 1H), 2.66-2.73 (m, 1H), 2.81 (s, 1H), 3.16-3.21 (m, 1H), 4.13-4.19 (m, 1H), 4.44 (s, 1H), 4.60 (d,  $J = 15.6$  Hz, 1H), 4.91 (d,  $J = 16.0$  Hz, 1H), 5.19 (d,  $J = 3.6$  Hz, 1H), 6.49 (d,  $J = 8.4$  Hz, 1H), 7.08-7.26 (m, 6H), 7.86 (s, 1H);  $^{13}\text{C}$  NMR ( $\text{CDCl}_3$ , 100 MHz)  $\delta$ : 15.7, 17.7, 22.2, 25.1, 25.9, 27.4, 30.1, 31.2, 31.7, 37.2, 40.8, 42.2, 43.2, 52.9, 60.1, 75.7, 80.8, 109.1, 116.1, 125.8, 126.8, 126.9, 127.9, 128.8, 133.6, 139.5, 150.1, 171.6,



174.3; HRMS (ESI-TOF)  $m/z$ : Calcd. for  $C_{34}H_{37}ClN_2NaO_4$   $[M+Na]^+$ : 595.2334; Found: 595.2325.

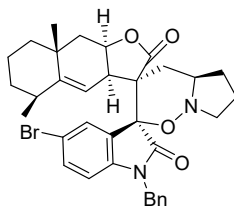

**(3S,3'R,3a''R,4a'R,5''S,8a''R,9a''R)-1-benzyl-5-bromo-5'',8a''-dimethyl-3a'',4a',5',5'',6',6'',7',7'',8'',8a'',9'',9a''-dodecahydro-2''H,4'H-dispiro[indoline-3,2'-pyrrolo[1,2-b][1,2]oxazine-3',3''-naphtho[2,3-b]furan]-2,2''-dione (3m):** Light yellow solid, m.p. 129.3-130.4 °C, overall yield 44% (54.2 mg), >20:1 dr;  $^1H$  NMR ( $CDCl_3$ , 400 MHz)  $\delta$ : 1.02-1.05 (m, 6H), 1.16-1.19 (m, 1H), 1.32-1.35 (m, 2H), 1.43-1.49 (m, 3H), 1.65-1.82 (m, 5H), 1.90-1.96 (m, 1H), 2.18-2.23 (m, 1H), 2.31-2.37 (m, 1H), 2.43-2.47 (m, 1H), 2.67-2.73 (m, 1H), 2.81 (s, 1H), 3.17-3.21 (m, 1H), 4.13-4.20 (m, 1H), 4.44 (s, 1H), 4.59 (d,  $J$  = 16.0 Hz, 1H), 4.92 (d,  $J$  = 16.0 Hz, 1H), 5.20 (d,  $J$  = 4.0 Hz, 1H), 6.44 (d,  $J$  = 8.4 Hz, 1H), 7.14-7.26 (m, 6H), 7.99 (s, 1H);  $^{13}C$  NMR ( $CDCl_3$ , 100 MHz)  $\delta$ : 15.7, 17.7, 22.2, 25.1, 25.9, 27.3, 30.1, 31.2, 31.7, 37.2, 40.8, 42.2, 43.2, 53.0, 60.2, 75.7, 80.7, 109.6, 114.4, 116.0, 125.8, 126.8, 127.9, 128.2, 131.7, 133.6, 140.0, 150.1, 171.5, 174.3; HRMS (ESI-TOF)  $m/z$ : Calcd. for  $C_{34}H_{37}BrN_2NaO_4$   $[M+Na]^+$ : 639.1829; Found: 639.1835.

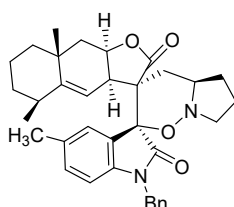

**(3S,3'R,3a''R,4a'R,5''S,8a''R,9a''R)-1-benzyl-5,5'',8a''-trimethyl-3a'',4a',5',5'',6',6'',7',7'',8'',8a'',9'',9a''-dodecahydro-2''H,4'H-dispiro[indoline-3,2'-pyrrolo[1,2-b][1,2]oxazine-3',3''-naphtho[2,3-b]furan]-2,2''-dione (3n):** Light yellow solid, m.p. 136.7-137.3 °C, overall yield 42% (46.4 mg), 20:1 dr;  $^1H$  NMR ( $CDCl_3$ , 400 MHz)  $\delta$ : 1.03-1.08 (m, 6H), 1.15-1.20 (m, 1H), 1.25-1.34 (m, 2H), 1.42-1.48 (m, 3H), 1.67-1.90 (m, 6H), 1.98-2.00 (m, 1H), 2.21-2.24 (m, 3H), 2.33 (s, 1H), 2.42-2.46 (m, 1H), 2.75-2.76 (m, 1H), 2.92 (s, 1H), 3.17-3.21 (m, 1H), 3.91-4.03 (m, 1H), 4.31 (s, 1H), 4.61 (d,  $J$  = 15.6 Hz, 1H), 4.91 (d,  $J$  = 16.0 Hz, 1H), 5.21 (d,  $J$  = 3.6 Hz, 1H), 6.46 (d,  $J$  = 8.0 Hz, 1H), 6.90-6.92 (m, 1H), 7.16-7.24 (m, 5H), 7.57 (s, 1H);  $^{13}C$  NMR ( $CDCl_3$ , 100 MHz)  $\delta$ : 15.7, 19.1, 20.4, 22.2, 25.9, 27.3, 29.5, 31.2, 31.7, 37.3,

38.1, 40.9, 42.2, 43.0, 52.6, 60.4, 75.3, 80.7, 107.9, 116.0, 125.9, 126.5, 127.8, 127.9, 129.4, 131.0, 134.3, 138.7, 149.7, 171.9, 174.7; HRMS (ESI-TOF)  $m/z$ : Calcd. for  $C_{35}H_{40}N_2NaO_4$   $[M+Na]^+$ : 575.2880; Found: 575.2877.

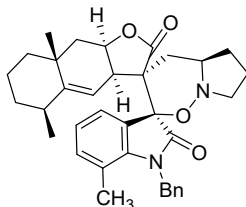

**(3*S*,3'*R*,3*a*'*R*,4*a*'*R*,5''*S*,8*a*'*R*,9*a*'*R*)-1-benzyl-5'',7,8*a*'-trimethyl-3*a*'',4*a*',5',5'',6',6'',7',7'',8'',8*a*'',9'',9*a*''-dodecahydro-2''*H*,4'*H*-dispiro[indoline-3,2'-pyrrolo[1,2-*b*][1,2]oxazine-3',3''-naphtho[2,3-*b*]furan]-2,2''-dione (3o)**: Light yellow solid, m.p. 144.2-145.8 °C, overall yield 40% (44.2 mg), >20:1 dr;  $^1H$  NMR ( $CDCl_3$ , 400 MHz)  $\delta$ : 1.04-1.05 (m, 6H), 1.16-1.21 (m, 1H), 1.29-1.35 (m, 2H), 1.42-1.48 (m, 3H), 1.70-1.77 (m, 3H), 1.84-1.92 (m, 1H), 2.15 (s, 3H), 2.31-2.44 (m, 3H), 2.75-2.77 (m, 1H), 2.89 (s, 1H), 3.18-3.22 (m, 1H), 3.95-4.00 (m, 1H), 4.29 (s, 1H), 5.00 (d,  $J = 17.2$  Hz, 1H), 5.12-5.20 (m, 2H), 6.88-6.94 (m, 2H), 7.10 (d,  $J = 7.2$  Hz, 2H), 7.14-7.18 (m, 1H), 7.22-7.26 (m, 2H), 7.75 (s, 1H);  $^{13}C$  NMR ( $CDCl_3$ , 100 MHz)  $\delta$ : 15.7, 117.9, 18.6, 22.2, 25.7, 27.4, 29.0, 31.2, 31.7, 37.3, 38.7, 40.9, 42.2, 44.4, 52.8, 61.2, 75.3, 79.8, 116.1, 118.6, 121.6, 124.5, 124.8, 126.2, 127.8, 133.2, 136.0, 139.2, 149.7, 173.0, 174.7; HRMS (ESI-TOF)  $m/z$ : Calcd. for  $C_{35}H_{40}N_2NaO_4$   $[M+Na]^+$ : 575.2880; Found: 575.2884.

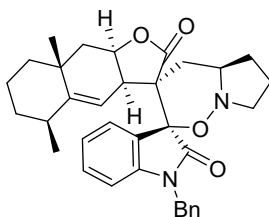

**(3*S*,3'*R*,3*a*'*R*,4*a*'*R*,5''*S*,8*a*'*R*,9*a*'*R*)-1-benzyl-5'',8*a*'-dimethyl-3*a*'',4*a*',5',5'',6',6'',7',7'',8'',8*a*'',9'',9*a*''-dodecahydro-2''*H*,4'*H*-dispiro[indoline-3,2'-pyrrolo[1,2-*b*][1,2]oxazine-3',3''-naphtho[2,3-*b*]furan]-2,2''-dione (3p)**: Light yellow solid, m.p. 139.0-140.3 °C, overall yield 40% (43.0 mg), 16:1 dr;  $^1H$  NMR ( $CDCl_3$ , 400 MHz)  $\delta$ : 1.02-1.05 (m, 6H), 1.15-1.18 (m, 1H), 1.28-1.34 (m, 2H), 1.42-1.48 (m, 3H), 1.68-1.92 (m, 6H), 2.22-2.35 (m, 2H), 2.43-2.46 (m, 1H), 2.71-2.74 (m, 1H), 2.87 (s, 1H), 3.15-3.20 (m, 1H), 3.94-4.07 (m,

1H), 4.36 (s, 1H), 4.61 (d,  $J = 16.0$  Hz, 1H), 4.95 (d,  $J = 16.0$  Hz, 1H), 5.21 (d,  $J = 4.0$  Hz, 1H), 6.57 (d,  $J = 8.0$  Hz, 1H), 6.94-6.97 (m, 1H), 7.10-7.25 (m, 6H), 7.82 (s, 1H);  $^{13}\text{C}$  NMR ( $\text{CDCl}_3$ , 100 MHz)  $\delta$ : 15.7, 18.4, 22.2, 25.5, 27.4, 29.8, 31.2, 31.7, 37.2, 37.9, 40.8, 42.2, 43.0, 52.6, 60.3, 75.4, 80.7, 108.2, 116.1, 121.6, 125.9, 126.6, 127.8, 128.0, 129.0, 134.1, 141.0, 149.8, 169.7, 172.0, 174.6; HRMS (ESI-TOF)  $m/z$ : Calcd. for  $\text{C}_{34}\text{H}_{38}\text{N}_2\text{NaO}_4$   $[\text{M}+\text{Na}]^+$ : 561.2724; Found: 561.2717.

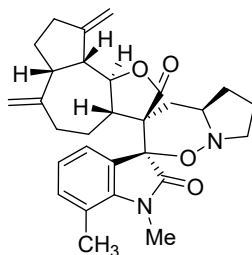

**(2'S,3R,3aS,4a'R,6aR,9aR,9bS)-1'',7''-dimethyl-6,9-dimethylene-3a,4,4a',5,5',6,6a,6',7,7',8,9,9a,9b-tetradecahydro-2H,4'H-dispiro[azuleno[4,5-b]furan-3,3'-pyrrolo[1,2-b][1,2]oxazine-2',3''-indoline]-2,2''-dione (5a):** Light yellow solid, m.p. 171.5-172.8 °C; overall yield 47% (44.6 mg), 15:1 dr;  $^1\text{H}$  NMR ( $\text{CDCl}_3$ , 400 MHz)  $\delta$ : 1.23-1.30 (m, 1H), 1.60-1.84 (m, 7H), 1.97-2.01 (m, 2H), 2.19-2.37 (m, 4H), 2.44-2.51 (m, 5H), 2.90-2.92 (m, 1H), 3.15-3.17 (m, 1H), 3.23-3.28 (m, 1H), 3.38-3.45 (m, 4H), 3.75-3.80 (m, 1H), 4.62 (s, 1H), 4.72 (s, 1H), 4.90 (s, 1H), 5.00 (s, 1H), 6.83-6.87 (m, 1H), 7.00 (d,  $J = 8.0$  Hz, 1H), 7.36 (d,  $J = 6.8$  Hz, 1H);  $^{13}\text{C}$  NMR ( $\text{CDCl}_3$ , 100 MHz)  $\delta$ : 18.3, 22.0, 23.4, 25.9, 26.2, 27.4, 28.4, 28.8, 31.2, 35.0, 44.7, 46.3, 51.7, 57.3, 60.9, 78.4, 81.5, 108.6, 110.8, 118.1, 122.2, 124.1, 125.0, 133.4, 141.0, 148.6, 150.2, 171.2, 174.9; HRMS (ESI-TOF)  $m/z$ : Calcd. for  $\text{C}_{29}\text{H}_{35}\text{N}_2\text{O}_4$   $[\text{M}+\text{H}]^+$ : 475.2591; Found: 475.2585.

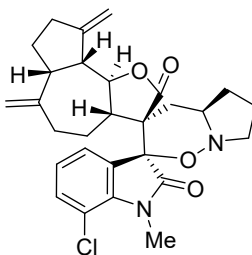

**(2'S,3R,3aS,4a'R,6aR,9aR,9bS)-7''-chloro-1''-methyl-6,9-dimethylene-3a,4,4a',5,5',6,6a,6',7,7',8,9,9a,9b-tetradecahydro-2H,4'H-dispiro[azuleno[4,5-b]furan-3,3'-**

**pyrrolo[1,2-b][1,2]oxazine-2',3''-indoline]-2,2''-dione (5b):** Light yellow solid, m.p. 187.2-187.7 °C; overall yield 40% (39.5 mg), >20:1 dr; <sup>1</sup>H NMR (CDCl<sub>3</sub>, 400 MHz)  $\delta$ : 1.24-1.31 (m, 1H), 1.62-1.86 (m, 7H), 1.97-2.05 (m, 2H), 2.19-2.24 (m, 1H), 2.29-2.38 (m, 3H), 2.55-2.57 (m, 2H), 2.93 (s, 1H), 3.05-3.14 (m, 1H), 3.22-3.27 (m, 1H), 3.46-3.52 (m, 4H), 3.77-3.82 (m, 1H), 4.64 (s, 1H), 4.73 (s, 1H), 4.92 (d,  $J$  = 1.2 Hz, 1H), 5.01 (d,  $J$  = 1.2 Hz, 1H), 6.87-6.91 (m, 1H), 7.20-7.22 (m, 1H), 7.45 (d,  $J$  = 4.8 Hz, 1H); <sup>13</sup>C NMR (CDCl<sub>3</sub>, 100 MHz)  $\delta$ : 22.2, 23.5, 25.9, 26.0, 27.5, 28.5, 28.7, 31.2, 35.1, 44.7, 46.1, 51.7, 57.1, 60.8, 78.5, 81.7, 108.6, 110.9, 114.1, 123.0, 125.0, 131.9, 139.2, 148.4, 150.2, 170.7, 174.6; HRMS (ESI-TOF)  $m/z$ : Calcd. for C<sub>28</sub>H<sub>32</sub>ClN<sub>2</sub>O<sub>4</sub> [M+H]<sup>+</sup>: 495.2045; Found: 495.2049.

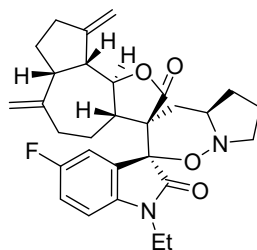

**(2'S,3R,3aS,4a'R,6aR,9aR,9bS)-1''-ethyl-5''-fluoro-6,9-dimethylene-3a,4,4a',5,5',6,6a,6',7,7',8,9,9a,9b-tetradecahydro-2H,4'H-dispiro[azuleno[4,5-b]furan-3,3'-pyrrolo[1,2-b][1,2]oxazine-2',3''-indoline]-2,2''-dione (5c):** Light yellow solid, m.p. 177.8-178.4 °C; overall yield 39% (38.4 mg), >20:1 dr; <sup>1</sup>H NMR (CDCl<sub>3</sub>, 400 MHz)  $\delta$ : 1.16-1.20 (m, 3H), 1.26-1.29 (m, 1H), 1.55-1.74 (m, 7H), 1.85 (d,  $J$  = 14.4 Hz, 1H), 2.02-2.24 (m, 3H), 2.31-2.39 (m, 3H), 2.50 (s, 1H), 2.92 (s, 1H), 3.14 (s, 1H), 3.23-3.28 (m, 1H), 3.46-3.51 (m, 2H), 3.80-3.84 (m, 1H), 4.61 (s, 1H), 4.73 (s, 1H), 4.94 (s, 1H), 5.03 (s, 1H), 6.66-6.69 (m, 1H), 6.96-7.01 (m, 1H), 7.34 (s, 1H); <sup>13</sup>C NMR (CDCl<sub>3</sub>, 100 MHz)  $\delta$ : 11.6, 19.7, 21.6, 25.9, 26.0, 27.6, 28.8, 31.2, 33.6, 35.8, 45.1, 45.9, 51.7, 57.4, 61.1, 79.2, 81.6, 107.3 (d,  $J_{CF}$  = 8.0 Hz), 108.7, 110.8, 114.9 (d,  $J_{CF}$  = 30.0 Hz), 115.8 (d,  $J_{CF}$  = 23.3 Hz), 125.2, 138.2, 148.5, 150.1, 160.2 (d,  $J_{CF}$  = 233.4 Hz), 169.9, 174.5; <sup>19</sup>F NMR (CDCl<sub>3</sub>, 470 MHz)  $\delta$ : -119.41; HRMS (ESI-TOF)  $m/z$ : Calcd. for C<sub>29</sub>H<sub>34</sub>FN<sub>2</sub>O<sub>4</sub> [M+H]<sup>+</sup>: 493.2497; Found: 493.2504.

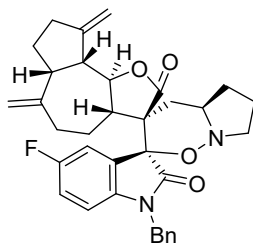

**(2'S,3R,3aS,4a'R,6aR,9aR,9bS)-1''-benzyl-5''-fluoro-6,9-dimethylene-3a,4,4a',5,5',6,6a,6',7,7',8,9,9a,9b-tetradecahydro-2H,4'H-dispiro[azuleno[4,5-b]furan-3,3'-pyrrolo[1,2-b][1,2]oxazine-2',3''-indoline]-2,2''-dione (5d):** Light yellow solid, m.p. 197.7-198.5 °C; overall yield 45% (49.9 mg), >20:1 dr; <sup>1</sup>H NMR (CDCl<sub>3</sub>, 400 MHz)  $\delta$ : 1.24-1.30 (m, 1H), 1.51-1.71 (m, 6H), 1.74-1.80 (m, 1H), 1.87 (d,  $J$  = 14.0 Hz, 1H), 2.18-2.41 (m, 6H), 2.48 (s, 1H), 2.88-2.94 (m, 1H), 3.20-3.30 (m, 2H), 3.45 (s, 1H), 3.79-3.84 (m, 1H), 4.57-4.61 (m, 2H), 4.72 (s, 1H), 4.94 (d,  $J$  = 1.6 Hz, 1H), 4.99-5.04 (m, 2H), 6.58-6.61 (m, 1H), 6.86-6.91 (m, 1H), 7.19-7.27 (m, 5H), 7.35 (s, 1H); <sup>13</sup>C NMR (CDCl<sub>3</sub>, 100 MHz)  $\delta$ : 22.2, 23.1, 25.9, 28.1, 28.7, 31.3, 36.1, 42.9, 45.6, 51.4, 59.5, 61.2, 79.1, 82.0, 108.3 (d,  $J_{CF}$  = 8.2 Hz), 108.6 (d,  $J_{CF}$  = 30.0 Hz), 110.5, 115.6, 115.9, 124.7, 125.0, 126.4, 126.9, 127.9, 134.4, 138.7, 148.7, 150.1, 157.9 (d,  $J_{CF}$  = 257.3 Hz), 170.4, 174.5; <sup>19</sup>F NMR (CDCl<sub>3</sub>, 470 MHz)  $\delta$ : -118.63; HRMS (ESI-TOF)  $m/z$ : Calcd. for C<sub>34</sub>H<sub>36</sub>FN<sub>2</sub>O<sub>4</sub> [M+H]<sup>+</sup>: 555.2654; Found: 555.2657.

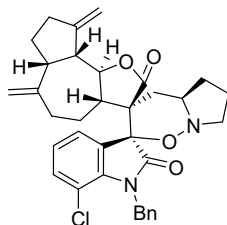

**(2'S,3R,3aS,4a'R,6aR,9aR,9bS)-1''-benzyl-7''-chloro-6,9-dimethylene-3a,4,4a',5,5',6,6a,6',7,7',8,9,9a,9b-tetradecahydro-2H,4'H-dispiro[azuleno[4,5-b]furan-3,3'-pyrrolo[1,2-b][1,2]oxazine-2',3''-indoline]-2,2''-dione (5e):** Light yellow solid, m.p. 194.6-195.5 °C; overall yield 36% (41.0 mg), >20:1 dr; <sup>1</sup>H NMR (CDCl<sub>3</sub>, 400 MHz)  $\delta$ : 1.17-1.20 (m, 1H), 1.35-1.40 (m, 1H), 1.64-1.71 (m, 4H), 1.75-1.86 (m, 3H), 2.15-2.24 (m, 3H), 2.31-2.39 (m, 2H), 2.50-2.53 (m, 2H), 2.88-2.93 (m, 1H), 3.16 (s, 1H), 3.25-3.30 (m, 1H), 3.44 (s, 1H), 3.76-3.81 (m, 1H), 4.59 (s, 1H), 4.69 (s, 1H), 4.93 (d,  $J$  = 1.6 Hz, 1H), 5.03 (d,  $J$  = 1.2 Hz, 1H), 5.20 (d,  $J$  = 16.0 Hz, 1H), 5.37 (d,  $J$  = 16.0 Hz, 1H), 6.88-6.92 (m, 1H), 7.17-7.23 (m, 6H), 7.52 (s, 1H); <sup>13</sup>C NMR (CDCl<sub>3</sub>, 100 MHz)  $\delta$ : 22.2, 23.4, 26.0, 28.1, 28.6, 31.3, 35.9, 43.9, 44.7, 45.6, 51.4, 57.0,

61.0, 78.2, 81.9, 108.6, 110.5, 114.0, 123.1, 125.3, 125.8, 126.3, 127.6, 132.3, 136.3, 148.7, 150.2, 170.9, 174.8; HRMS (ESI-TOF)  $m/z$ : Calcd. for  $C_{34}H_{36}ClN_2O_4$   $[M+H]^+$ : 571.2358; Found: 571.2352.

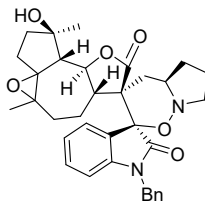

**(3S,3'R,3a''S,4a'R,6a''S,6b''S,7''R)-1-benzyl-7''-hydroxy-1a'',7''-dimethyl-1a'',2'',3a'',4a',5',6',6a'',6b'',7',7'',8'',9''-dodecahydro-3''H,4'H,5''H-dispiro[indoline-3,2'-pyrrolo[1,2-b][1,2]oxazine-3',4''-oxireno[2',3':8,8a]azuleno[4,5-b]furan]-2,5''-dione (6a):**  
 Light yellow solid, m.p. 281.0-281.5 °C; overall yield 46% (52.4 mg), >20:1 dr;  $^1H$  NMR ( $CDCl_3$ , 400 MHz)  $\delta$ : 0.76-0.83 (m, 1H), 1.07 (s, 3H), 1.19-1.22 (m, 1H), 1.35-1.36 (m, 4H), 1.47-1.53 (m, 1H), 1.60-1.80 (m, 7H), 1.92-2.03 (m, 2H), 2.16-2.24 (m, 2H), 2.74 (s, 1H), 2.90 (s, 1H), 3.06 (s, 1H), 3.24-3.28 (m, 1H), 3.41-3.44 (m, 1H), 4.04-4.09 (m, 1H), 4.61 (d,  $J$  = 14.8 Hz, 1H), 4.92 (d,  $J$  = 15.2 Hz, 1H), 6.71 (d,  $J$  = 8.0 Hz, 1H), 6.92-6.96 (m, 1H), 7.17-7.26 (m, 6H), 7.51 (s, 1H);  $^{13}C$  NMR ( $CDCl_3$ , 100 MHz)  $\delta$ : 21.8, 22.3, 25.9, 26.0, 28.0, 32.4, 36.4, 42.8, 49.0, 54.7, 60.9, 61.2, 68.5, 77.9, 78.7, 107.7, 122.5, 125.0, 126.8, 127.9, 129.4, 134.7, 170.6, 174.0; HRMS (ESI-TOF)  $m/z$ : Calcd. for  $C_{34}H_{39}N_2O_6$   $[M+H]^+$ : 571.2803; Found: 571.2801.

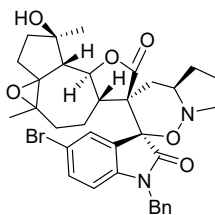

**(3S,3'R,3a''S,4a'R,6a''S,6b''S,7''R)-1-benzyl-5-bromo-7''-hydroxy-1a'',7''-dimethyl-1a'',2'',3a'',4a',5',6',6a'',6b'',7',7'',8'',9''-dodecahydro-3''H,4'H,5''H-dispiro[indoline-3,2'-pyrrolo[1,2-b][1,2]oxazine-3',4''-oxireno[2',3':8,8a]azuleno[4,5-b]furan]-2,5''-dione (6b):**  
 Light yellow solid, m.p. 290.5-291.7 °C; overall yield 45% (58.3 mg), >20:1 dr;  $^1H$  NMR ( $CDCl_3$ , 400 MHz)  $\delta$ : 0.76-0.82 (m, 1H), 1.12 (s, 3H), 1.19 (s, 1H), 1.35-1.37 (m, 4H), 1.50-1.56 (m, 1H), 1.65-1.82 (m, 6H), 1.94-2.07 (m, 5H), 2.74-2.83 (m, 3H), 3.24-3.35 (m, 2H), 4.08-4.13 (m, 1H), 4.60-4.68 (m, 1H), 4.86-4.90 (m, 1H), 6.56 (d,  $J$  = 8.0 Hz, 1H), 7.20-7.32 (m, 6H), 7.71 (s, 1H);

$^{13}\text{C}$  NMR ( $\text{CDCl}_3$ , 100 MHz)  $\delta$ : 21.9, 22.3, 25.8, 25.9, 27.9, 32.3, 36.5, 42.9, 49.7, 54.5, 60.9, 61.2, 68.5, 77.8, 78.7, 109.2, 114.9, 126.5, 126.9, 128.0, 132.1, 134.1, 170.1, 173.6; HRMS (ESI-TOF)  $m/z$ : Calcd. for  $\text{C}_{34}\text{H}_{38}\text{BrN}_2\text{O}_6$   $[\text{M}+\text{H}]^+$ : 649.1908; Found: 649.1913.

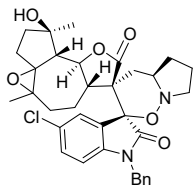

**(3S,3'R,3a''S,4a'R,6a''S,6b''S,7''R)-1-benzyl-5-chloro-7''-hydroxy-1a'',7''-dimethyl-1a'',2'',3a'',4a'',5',6',6a'',6b'',7',7'',8'',9''-dodecahydro-3''H,4'H,5''H-dispiro[indoline-3,2'-pyrrolo[1,2-b][1,2]oxazine-3',4''-oxireno[2',3':8,8a]azuleno[4,5-b]furan]-2,5''-dione (6c):** Light yellow solid, m.p. 287.5-287.9 °C; overall yield 41% (49.5 mg), >20:1 dr;  $^1\text{H}$  NMR ( $\text{CDCl}_3$ , 400 MHz)  $\delta$ : 0.76-0.82 (m, 1H), 1.12 (s, 3H), 1.17-1.20 (m, 1H), 1.35-1.36 (m, 4H), 1.50-1.56 (m, 1H), 1.64-1.82 (m, 6H), 1.90-2.07 (m, 5H), 2.74-2.83 (m, 3H), 3.24-3.35 (m, 2H), 4.08-4.13 (m, 1H), 4.63-4.66 (m, 1H), 4.87-4.90 (m, 1H), 6.60 (d,  $J = 8.0$  Hz, 1H), 7.14-7.27 (m, 6H), 7.59 (s, 1H);  $^{13}\text{C}$  NMR ( $\text{CDCl}_3$ , 100 MHz)  $\delta$ : 21.9, 22.3, 25.8, 25.9, 27.9, 32.3, 36.5, 42.9, 54.5, 60.9, 61.2, 68.5, 77.8, 78.7, 108.7, 122.3, 124.8, 126.3, 126.5, 126.9, 128.0, 129.1, 134.1, 170.2, 173.6; HRMS (ESI-TOF)  $m/z$ : Calcd. for  $\text{C}_{34}\text{H}_{38}\text{ClN}_2\text{O}_6$   $[\text{M}+\text{H}]^+$ : 605.2413; Found: 605.2416.

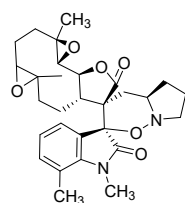

**(1aR,1bS,2'S,4R,4aS,4a'R,9aR)-1'',6a,7'',9a-tetramethyl-1a,1b,4a,4a',5,5',6,6a,6',7a,7',8,9,9a-tetradecahydro-3H,4'H-dispiro[bis(oxireno)[2',3':5,6;2'',3'':9,10]cyclodeca[1,2-b]furan-4,3'-pyrrolo[1,2-b][1,2]oxazine-2'',3''-indoline]-2'',3-dione (7a):** Light yellow solid, m.p. 267.0-267.9 °C; overall yield 47% (47.8 mg), >20:1 dr;  $^1\text{H}$  NMR ( $\text{CDCl}_3$ , 400 MHz)  $\delta$ : 0.42-0.48 (m, 1H), 0.89-0.96 (m, 1H), 1.10-1.17 (m, 1H), 1.20 (s, 3H), 1.26 (s, 3H), 1.34-1.37 (m, 1H), 1.41-1.45 (m, 1H), 1.63-1.67 (m, 1H), 1.81 (d,  $J = 14.4$  Hz, 1H), 1.94-2.02 (m, 2H), 2.09-2.13 (m, 1H), 2.24-2.36 (m, 4H), 2.43-2.51 (m, 5H), 2.89-2.97 (m, 1H), 3.22-3.32 (m, 2H), 3.36 (s, 3H), 3.51-3.57 (m, 1H), 3.71-3.76 (m, 1H), 6.83-6.87 (m, 1H), 7.01 (d,  $J = 7.6$  Hz, 1H), 7.40 (d,  $J = 8.4$  Hz, 1H);  $^{13}\text{C}$  NMR

(CDCl<sub>3</sub>, 100 MHz)  $\delta$ : 15.9, 16.3, 18.3, 18.5, 19.8, 21.3, 22.0, 23.2, 26.3, 28.4, 34.4, 39.6, 45.4, 47.7, 57.4, 59.2, 59.9, 60.8, 61.2, 61.9, 64.2, 78.5, 118.3, 122.6, 124.5, 133.8, 140.8, 170.9, 173.4; HRMS (ESI-TOF)  $m/z$ : Calcd. for C<sub>29</sub>H<sub>37</sub>N<sub>2</sub>O<sub>6</sub> [M+H]<sup>+</sup>: 509.2646; Found: 509.2651.

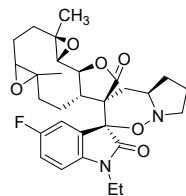

**(1aR,1bS,2'S,4R,4aS,4a'R,9aR)-1''-ethyl-5''-fluoro-6a,9a-dimethyl-1a,1b,4a,4a',5,5',6,6a,6',7a,7',8,9,9a-tetradecahydro-3H,4'H-dispiro[bis(oxireno)[2',3':5,6;2'',3'':9,10]cyclodeca[1,2-b]furan-4,3'-pyrrolo[1,2-b][1,2]oxazine-2',3''-indoline]-2'',3-dione (7b):** Light yellow solid, m.p. 267.3-268.7 °C; overall yield 42% (44.2 mg), >20:1 dr; <sup>1</sup>H NMR (CDCl<sub>3</sub>, 400 MHz)  $\delta$ : 0.47-0.50 (m, 1H), 0.99-1.04 (m, 1H), 1.17-1.20 (m, 7H), 1.28 (s, 3H), 1.35-1.41 (m, 1H), 1.45-1.54 (m, 1H), 1.63-1.68 (m, 2H), 1.85 (d,  $J$  = 14.0 Hz, 1H), 1.96-2.02 (m, 1H), 2.11-2.32 (m, 4H), 2.39-2.51 (m, 3H), 2.92 (s, 1H), 3.19 (s, 1H), 3.26-3.31 (m, 1H), 3.47-3.53 (m, 2H), 3.72-3.82 (m, 2H), 6.65-6.69 (m, 1H), 6.96-7.01 (m, 1H), 7.35 (d,  $J$  = 8.0 Hz, 1H); <sup>13</sup>C NMR (CDCl<sub>3</sub>, 100 MHz)  $\delta$ : 11.3, 15.9, 16.4, 18.6, 21.3, 22.1, 23.1, 26.1, 33.9, 34.4, 39.5, 45.5, 47.9, 57.3, 59.4, 59.7, 60.6, 62.3, 64.0, 78.5, 107.6 (d,  $J_{CF}$  = 8.0 Hz), 115.3 (d,  $J_{CF}$  = 28.1 Hz), 116.0 (d,  $J_{CF}$  = 34.5 Hz), 125.6 (d,  $J_{CF}$  = 15.1 Hz), 138.3, 157.8 (d,  $J_{CF}$  = 243.2 Hz), 169.7, 173.2; HRMS (ESI-TOF)  $m/z$ : Calcd. for C<sub>29</sub>H<sub>36</sub>FN<sub>2</sub>O<sub>6</sub> [M+H]<sup>+</sup>: 527.2557; Found: 527.2556.

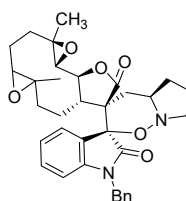

**(1aR,1bS,2'S,4R,4aS,4a'R,9aR)-1''-benzyl-6a,9a-dimethyl-1a,1b,4a,4a',5,5',6,6a,6',7a,7',8,9,9a-tetradecahydro-3H,4'H-dispiro[bis(oxireno)[2',3':5,6;2'',3'':9,10]cyclodeca[1,2-b]furan-4,3'-pyrrolo[1,2-b][1,2]oxazine-2',3''-indoline]-2'',3-dione (7c):** Light yellow solid, m.p. 269.0-270.8 °C; overall yield 49% (55.9 mg), 12:1 dr; <sup>1</sup>H NMR (CDCl<sub>3</sub>, 400 MHz)  $\delta$ : 0.42 (s, 1H), 0.94-0.98 (m, 1H), 1.08-1.15 (m, 1H), 1.18 (s, 3H), 1.26 (s, 3H), 1.32-1.35 (m, 1H), 1.48-1.53 (m, 1H), 1.64-1.68 (m,



2H), 1.86 (d,  $J = 17.0$  Hz, 1H), 1.93-1.96 (m, 1H), 2.08-2.21 (m, 3H), 2.32 (d,  $J = 8.8$  Hz, 2H), 2.44 (d,  $J = 10.6$  Hz, 2H), 2.94-2.98 (m, 1H), 3.24-3.35 (m, 2H), 3.54-3.59 (m, 1H), 3.76-3.81 (m, 1H), 4.39 (d,  $J = 15.2$  Hz, 1H), 5.12 (d,  $J = 15.6$  Hz, 1H), 6.63 (d,  $J = 7.6$  Hz, 1H), 6.91-6.94 (m, 1H), 7.14-7.25 (m, 6H), 7.53 (d,  $J = 7.6$  Hz, 1H);  $^{13}\text{C}$  NMR ( $\text{CDCl}_3$ , 100 MHz)  $\delta$ : 15.9, 16.4, 18.8, 22.1, 22.9, 26.2, 34.4, 39.3, 42.6, 45.4, 47.8, 57.2, 59.3, 59.8, 60.9, 62.1, 64.1, 78.4, 108.1, 122.7, 126.5, 126.8, 127.9, 128.0, 129.8, 134.0, 142.4, 170.4, 173.5; HRMS (ESI-TOF)  $m/z$ : Calcd. for  $\text{C}_{34}\text{H}_{39}\text{N}_2\text{O}_6$   $[\text{M}+\text{H}]^+$ : 571.2803; Found: 571.2809.

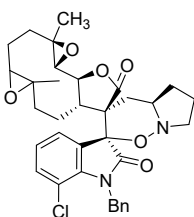

**(1aR,1bS,2'S,4R,4aS,4a'R,9aR)-1''-benzyl-7''-chloro-6a,9a-dimethyl-1a,1b,4a,4a',5,5',6,6a,6',7a,7',8,9,9a-tetradecahydro-3H,4'H-dispiro[bis(oxireno)[2',3':5,6;2'',3'':9,10]cyclodeca[1,2-b]furan-4,3'-pyrrolo[1,2-b][1,2]oxazine-2',3''-indoline]-2'',3-dione (7d):** Light yellow solid, m.p. 272.1-272.7 °C; overall yield 50% (60.4 mg), >20:1 dr;  $^1\text{H}$  NMR ( $\text{CDCl}_3$ , 400 MHz)  $\delta$ : 0.53 (s, 1H), 0.99-1.03 (m, 1H), 1.17-1.19 (m, 4H), 1.27 (s, 3H), 1.33-1.38 (m, 1H), 1.53-1.57 (m, 1H), 1.68-1.74 (m, 2H), 1.87 (d,  $J = 14.2$  Hz, 1H), 1.97-2.01 (m, 1H), 2.10-2.24 (m, 4H), 2.37-2.40 (m, 2H), 2.52 (d,  $J = 10.8$  Hz, 1H), 2.90-2.97 (m, 1H), 3.20 (s, 1H), 3.30-3.35 (m, 1H), 3.52 (s, 1H), 3.76-3.81 (m, 1H), 5.10 (d,  $J = 16.0$  Hz, 1H), 5.38 (d,  $J = 16.0$  Hz, 1H), 6.88-6.92 (m, 1H), 7.15-7.24 (m, 6H), 7.55 (d,  $J = 7.2$  Hz, 1H);  $^{13}\text{C}$  NMR ( $\text{CDCl}_3$ , 100 MHz)  $\delta$ : 15.9, 16.4, 19.0, 22.2, 23.1, 26.1, 34.4, 39.2, 43.8, 45.6, 48.0, 57.3, 59.5, 59.7, 60.6, 62.3, 63.9, 78.5, 114.2, 123.5, 125.6, 126.3, 127.6, 132.5, 135.5, 138.4, 170.9, 173.3; HRMS (ESI-TOF)  $m/z$ : Calcd. for  $\text{C}_{34}\text{H}_{38}\text{ClN}_2\text{O}_6$   $[\text{M}+\text{H}]^+$ : 605.2413; Found: 605.2413.

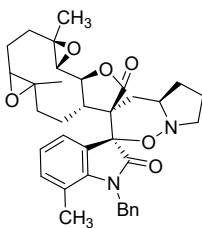

(1aR,1bS,2'S,4R,4aS,4a'R,9aR)-1''-benzyl-6a,7'',9a-trimethyl-1a,1b,4a,4a',5,5',6,6a,6',7a,7',8,9,9a-tetradecahydro-3H,4'H-dispiro[bis(oxireno)[2',3':5,6;2'',3'':9,10]cyclodeca[1,2-b]furan-4,3'-pyrrolo[1,2-b][1,2]oxazine-2',3''-indoline]-2'',3-dione (7e): Light yellow solid, m.p. 265.0-266.3 °C; overall yield 48% (56.1 mg), 15:1 dr; <sup>1</sup>H NMR (CDCl<sub>3</sub>, 400 MHz) δ: 0.54-0.59 (m, 1H), 0.93-1.00 (m, 1H), 1.15-1.18 (m, 1H), 1.21 (s, 3H), 1.28 (s, 3H), 1.35-1.39 (m, 1H), 1.63-1.70 (m, 4H), 1.85 (d, *J* = 14.4 Hz, 1H), 1.96-2.01 (m, 1H), 2.10-2.14 (m, 1H), 2.17 (s, 3H), 2.27-2.38 (m, 3H), 2.43-2.54 (m, 2H), 2.92-2.98 (m, 1H), 3.24-3.27 (m, 1H), 3.33-3.38 (m, 1H), 3.52-3.55 (m, 1H), 3.76-3.81 (m, 1H), 4.71 (d, *J* = 16.6 Hz, 1H), 5.38 (d, *J* = 16.8 Hz, 1H), 6.84-6.94 (m, 2H), 7.06 (d, *J* = 7.2 Hz, 2H), 7.13-7.17 (m, 1H), 7.20-7.23 (m, 2H), 7.47 (d, *J* = 7.6 Hz, 1H); <sup>13</sup>C NMR (CDCl<sub>3</sub>, 100 MHz) δ: 15.9, 16.4, 18.0, 18.5, 21.9, 22.1, 22.2, 26.3, 34.4, 39.6, 43.7, 45.5, 47.8, 57.1, 59.3, 59.9, 60.8, 62.1, 64.1, 78.5, 118.5, 122.7, 124.6, 125.5, 126.3, 127.8, 127.9, 133.9, 135.7, 140.3, 171.3, 173.5; HRMS (ESI-TOF) *m/z*: Calcd. for C<sub>35</sub>H<sub>41</sub>N<sub>2</sub>O<sub>6</sub> [M+H]<sup>+</sup>: 585.2959; Found: 585.2965.

### 3. X-ray crystal data for compound 3b

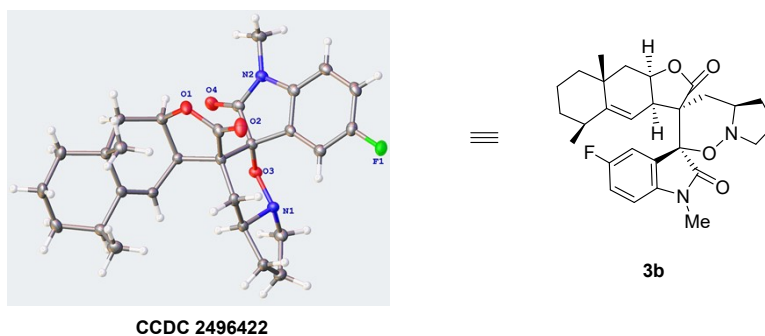

**Table S1 Crystal data and structure refinement for 3b**

|                                       |                                                                |
|---------------------------------------|----------------------------------------------------------------|
| Identification code                   | <b>3b</b>                                                      |
| Empirical formula                     | C <sub>28</sub> H <sub>33</sub> FN <sub>2</sub> O <sub>4</sub> |
| Formula weight                        | 480.56                                                         |
| Temperature/K                         | 100.00(10)                                                     |
| Crystal system                        | orthorhombic                                                   |
| Space group                           | P2 <sub>1</sub> 2 <sub>1</sub> 2 <sub>1</sub>                  |
| <i>a</i> /Å, <i>b</i> /Å, <i>c</i> /Å | 11.07456(8), 19.22227(13), 23.30686(16)                        |
| <i>α</i> /°, <i>β</i> /°, <i>γ</i> /° | 90, 90, 90                                                     |
| Volume/Å <sup>3</sup>                 | 4961.52(6)                                                     |
| <i>Z</i>                              | 8                                                              |

|                                                |                                                               |
|------------------------------------------------|---------------------------------------------------------------|
| $\rho_{\text{calc}}/\text{cm}^3$               | 1.287                                                         |
| $\mu/\text{mm}^{-1}$                           | 0.742                                                         |
| $F(000)$                                       | 2048.0                                                        |
| Radiation                                      | Cu K $\alpha$ ( $\lambda = 1.54184$ )                         |
| Crystal size/ $\text{mm}^3$                    | $0.15 \times 0.12 \times 0.1$                                 |
| $2\theta$ range for data collection/ $^\circ$  | 5.96 to 146.748                                               |
| Index ranges                                   | $-10 \leq h \leq 13, -23 \leq k \leq 17, -28 \leq l \leq 28$  |
| Reflections collected                          | 33378                                                         |
| Independent reflections                        | 9661 [ $R_{\text{int}} = 0.0343, R_{\text{sigma}} = 0.0296$ ] |
| Data/restraints/parameters                     | 9661/0/637                                                    |
| Goodness-of-fit on $F^2$                       | 1.043                                                         |
| Final R indexes [ $I \geq 2\sigma(I)$ ]        | $R_1 = 0.0296, wR_2 = 0.0709$                                 |
| Final R indexes [all data]                     | $R_1 = 0.0311, wR_2 = 0.0718$                                 |
| Largest diff. peak/hole / $e \text{ \AA}^{-3}$ | 0.14/-0.22                                                    |
| Flack parameter                                | -0.08(4)/-0.06(4)                                             |

**Crystal Data** for  $\text{C}_{28}\text{H}_{33}\text{FN}_2\text{O}_4$  ( $M = 480.56 \text{ g/mol}$ ): orthorhombic, space group  $P2_12_12_1$  (no. 19),  $a = 11.07456(8) \text{ \AA}$ ,  $b = 19.22227(13) \text{ \AA}$ ,  $c = 23.30686(16) \text{ \AA}$ ,  $V = 4961.52(6) \text{ \AA}^3$ ,  $Z = 8$ ,  $T = 100.00(10) \text{ K}$ ,  $\mu(\text{Cu K}\alpha) = 0.742 \text{ mm}^{-1}$ ,  $D_{\text{calc}} = 1.287 \text{ g/cm}^3$ , 33378 reflections measured ( $5.96^\circ \leq 2\theta \leq 146.748^\circ$ ), 9661 unique ( $R_{\text{int}} = 0.0343, R_{\text{sigma}} = 0.0296$ ) which were used in all calculations. The final  $R_1$  was 0.0296 ( $I > 2\sigma(I)$ ) and  $wR_2$  was 0.0718 (all data).

#### 4. MTT assay

A total of  $5 \times 10^3$  cells in the logarithmic growth phase were inoculated into a 96-well plate in RPMI-1640 medium and cultured for 24 h to allow cell adherence. Subsequently, compounds at various concentrations were added to the medium, and the cells were incubated for an additional 48 h. Next, 10  $\mu\text{L}$  of MTT solution with a concentration of 5 mg/mL was added for 4 h, the supernatant culture medium was discarded, shaken with 150  $\mu\text{L}$  of DMSO for 10 min, and the absorbance (OD value) value was detected at 490 nm on a microplate reader<sup>9</sup>. IBM SPSS Statistics 23 software was used to calculate the concentration of the compound that causes half cell death ( $\text{IC}_{50}$ ). Among them, inhibition rate (%) =  $(1 - (\text{treatment group OD}_{490} - \text{blank group OD}_{490}) / (\text{control group OD}_{490} - \text{blank group OD}_{490})) \times 100\%$ .

#### 5. Cytomorphologic analysis

A549 cells in logarithmic growth phase were digested with trypsin and diluted cells were seeded in 6-well plates at  $3 \times 10^5$  cells. Cultivate for 24 h, and treat with different concentrations of compound **3j** (0, 12.5, 25.0 and 50.0  $\mu\text{M}$ ) for 48 h. At the end of culture, A549 cells were

photographed under an inverted microscope (Leica Inc., Germany) to record morphological changes.

## **6. AO/EB staining analysis**

A549 cells were seeded into 6-well plates at  $3 \times 10^5$  cells/well and cultured for 24 h at 37°C, 5% CO<sub>2</sub>. After 48 h of drug treatment with control and drug groups. At the end of the culture, PBS was washed twice, and 100 µL of AO/EB staining solution prepared 1:1 immediately before use was added for incubation for 5 min, observed under an inverted fluorescence microscope, photographed and analyzed.

## **7. Apoptosis analysis**

A549 cells in logarithmic growth phase were inoculated into 6-well plates at a density of  $3 \times 10^5$  cells/well and cultured at 37°C in 5% CO<sub>2</sub> for 24 h. After treating the cells with 0, 12.5, 25.0 and 50.0 µM compound **3j** for 48 h, they were washed twice with precooled PBS. Then, 1 mL Hoechst 33258 staining solution was added to each well to fully cover the samples. The cells were incubated for 20 minutes. the staining solution was discarded, and the cells were washed 2-3 times with PBS. Fluorescence detection was performed by observation under an inverted fluorescence microscope, followed by photography and analysis.

## **8. Mitochondrial membrane potential analysis**

A549 cells were seeded into 6-well plates at  $3 \times 10^5$  cells/well and cultured for 24 h at 37°C with 5% CO<sub>2</sub>. Cultivate cells with different concentrations of compound **3j** (0, 12.5, 25.0 and 50.0 µM) for 48 h. Following treatment, the culture medium was removed by aspiration and the cells were washed once with PBS. Then, 1 mL cell culture medium and 1 mL JC-1 staining working solution were added to each well and mixed thoroughly. The cells were incubated at 37°C for 20 minutes in a cell incubator. After incubation, the supernatant was aspirated and the cells were washed twice with JC-1 staining buffer (1×). Subsequently, 2 mL cell culture medium was added to each well, and the cells were observed under fluorescence microscope.

## **9. DCFH-DA reactive oxygen species assessment**

A549 cells were plated in 6-well plates at a cell count of  $3 \times 10^5$  cells/well and grown for 24 h at 37°C, 5% CO<sub>2</sub>. Control and drug groups (12.5, 25.0 and 50.0 µM) were set up for 48 h of drug

treatment. The culture medium was aspirated, the cells were washed once with PBS, and 1 mL of diluted DCFH-DA was added to fully cover the cells, and the cells were incubated in a cell culture incubator at 37°C for 20 minutes. Cells were washed three times with serum-free cell culture medium to adequately remove DCFH-DA that did not enter the cells. An inverted fluorescence microscope was used to excite at 488 nm, photograph at 525 nm emission and record intracellular reactive oxygen species production.

#### **10. Apoptosis detection by flow cytometry**

After treating A549 cells with different concentrations of compound **3j** for 48 h, the cells were digested, centrifuged, and collected. The cells were then resuspended in pre-chilled PBS and centrifuged again. The supernatant was discarded after centrifugation, and the cell pellet containing  $1 \times 10^6$  cells was collected. The 5× Binding Buffer was diluted with double-distilled water to 1× working solution, and the cells were resuspended in 500 µL of this solution. Next, 5 µL Annexin V-PE and 10 µL 7-AAD were added to each tube. The tubes were gently vortexed to mix and incubated at room temperature in the dark for 5 minutes. Finally, the stained cells were immediately analyzed by flow cytometry.

#### **11. Cycles detected by flow cytometry**

After A549 cells were subjected to drug treatment for 48 h,  $1 \times 10^6$  cells were collected by centrifugation, and the supernatant was discarded. The cell pellet was washed once with PBS, followed by centrifugation and supernatant removal. The cells were resuspended in 1 mL of DNA Staining solution and 10 µL of permeabilization solution. then vortexed for 10 s. The mixture was incubated for 30 minutes at room temperature in the dark. Furthermore, the stained cells were analyzed immediately using a flow cytometer at the lowest flow rate.

#### **12. Western blot analysis**

A549 cells were trypsinized and seeded into 6-well plates at a density of  $3 \times 10^5$  cells/well and cultured at 37°C in 5% CO<sub>2</sub> for 24 h. Control and drug groups (12.5, 25.0, 50.0, and 100 µM) were set up for 48 h of drug treatment. Cells were detached using with a cell scraper, and the cell pellet was collected by centrifugation. After washing twice with PBS, the pellet was resuspended in 200 µL of lysis buffer and lysed on ice for 30 minutes. The lysate was collected by centrifugation at 12,000 rpm/min for 5 minutes, at 4°C to collect the supernatant containing the

extracted proteins. Five microliters of the supernatant was used for BCA protein concentration determination, while the remaining supernatant was mixed with 1/5 volume of 1×SDS loading buffer, denatured at 100°C for 5 minutes, and stored at -80°C.

Protein sample loading amount 20-40 µg. Electrophoresis condition: 80 V for about 30 minutes, then adjust the voltage to 120 V to continue electrophoresis, and stop electrophoresis when bromophenol blue reaches the bottom of the gel. Next, use the classic "sandwich" method to transfer the film. After the membrane transfer was completed, the PVDF membrane was washed three times with TBST and then sealed at room temperature with 5% skim milk powder for 1 h. Subsequently, the washed membrane was incubated overnight at 4 °C in the corresponding antibody dilution solution; Finally, after washing with TBST, the membrane was incubated with the secondary antibody at room temperature for 1 h. ECL chemiluminescence solution was added, and the PVDF membrane was developed and exposed in the Bio-Rad imaging system.

### 13. The copies of <sup>1</sup>H NMR and <sup>13</sup>C NMR spectra for compounds 3 and 5

<sup>1</sup>H and <sup>13</sup>C NMR of 3a

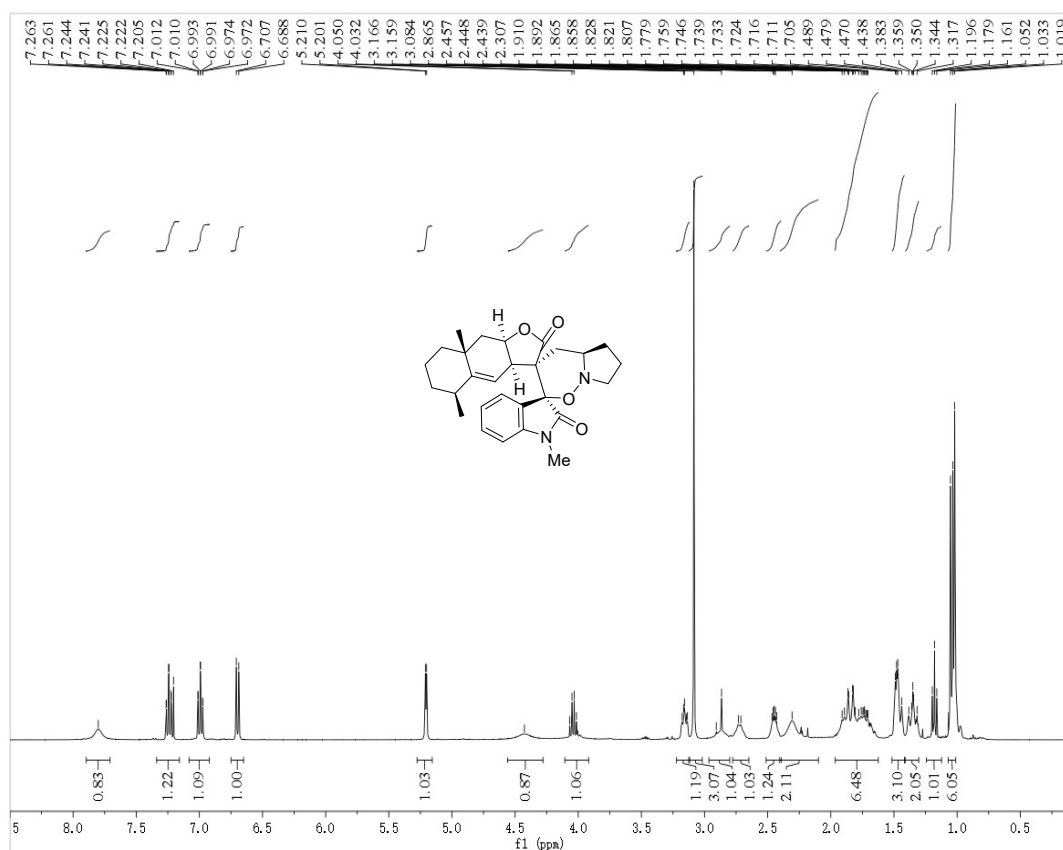

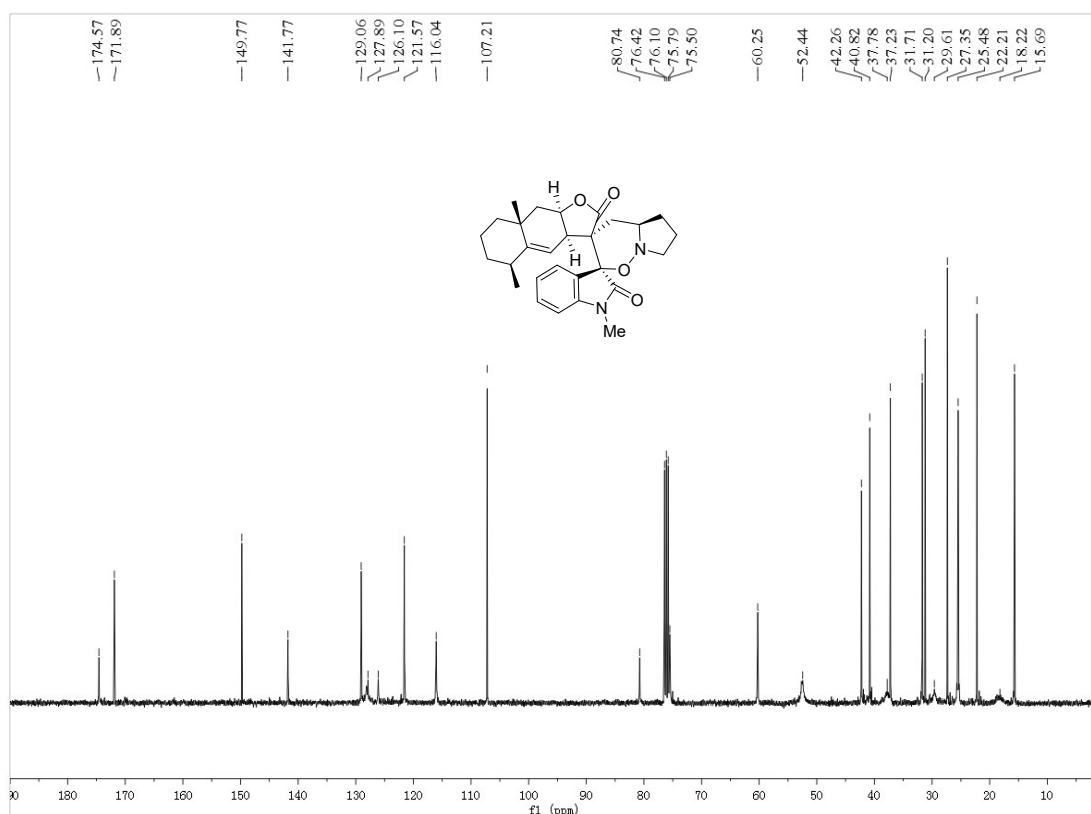

**<sup>1</sup>H and <sup>13</sup>C NMR of 3b**

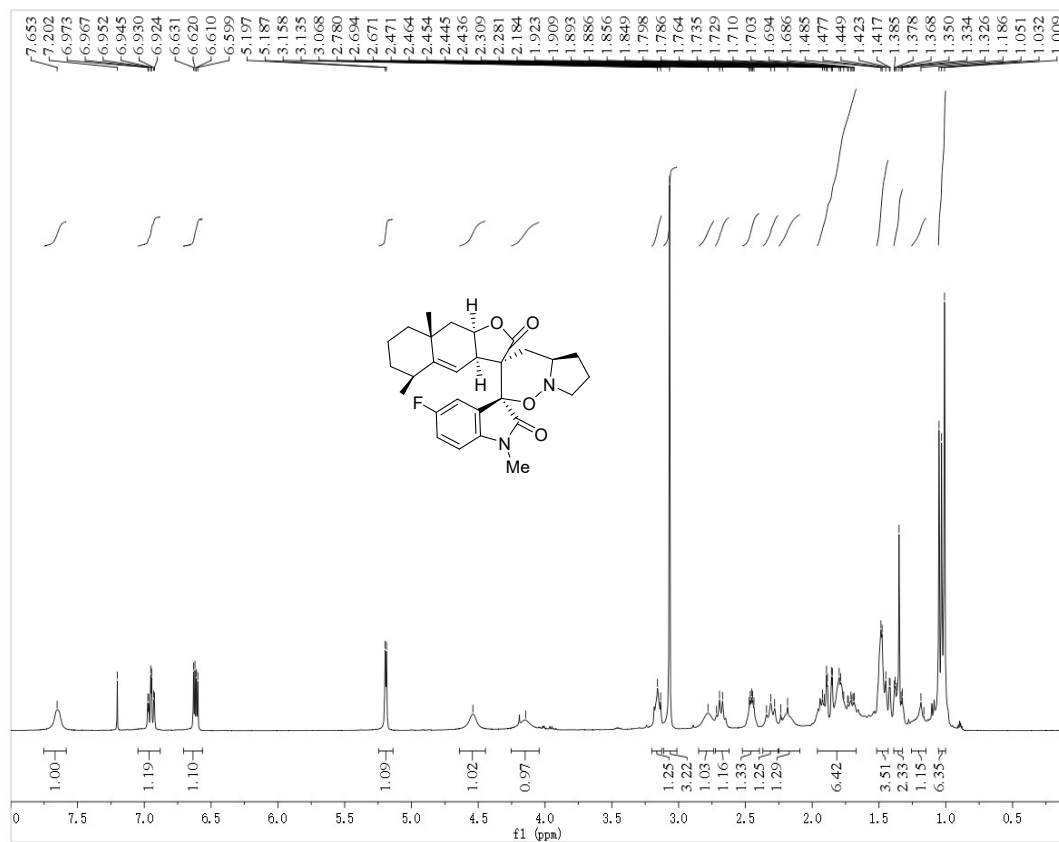

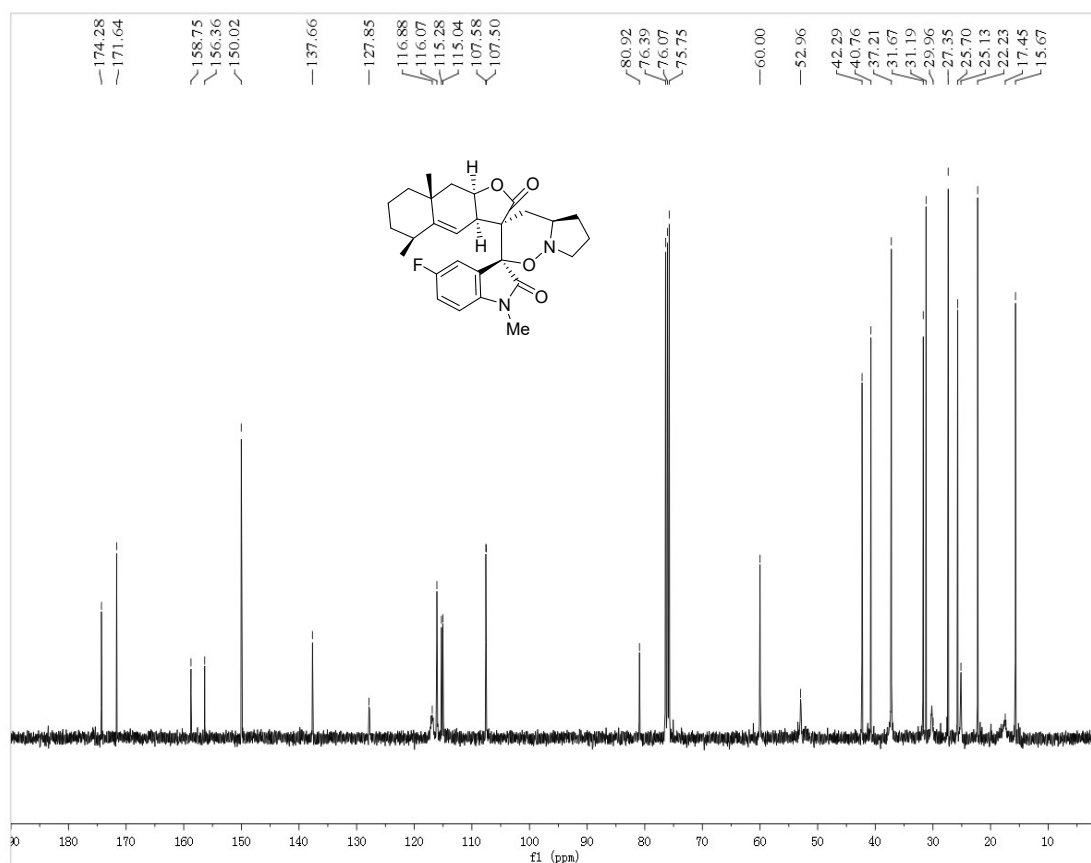

<sup>19</sup>F NMR of 3b

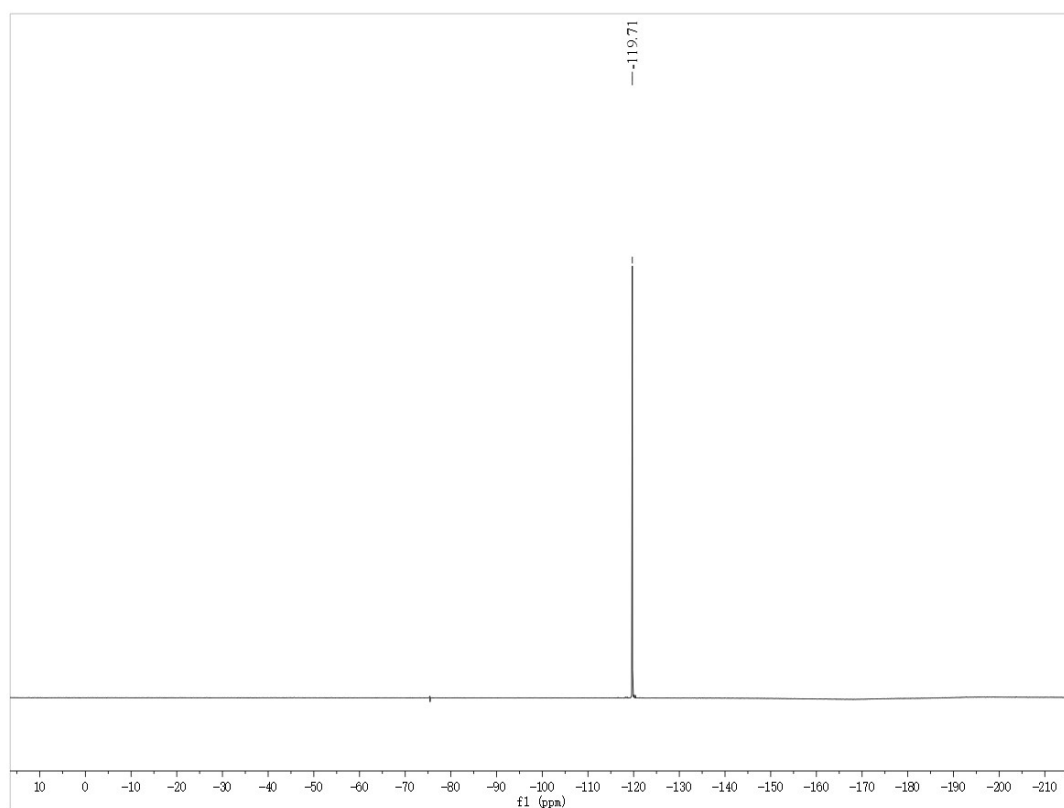



**<sup>1</sup>H and <sup>13</sup>C NMR of 3c**

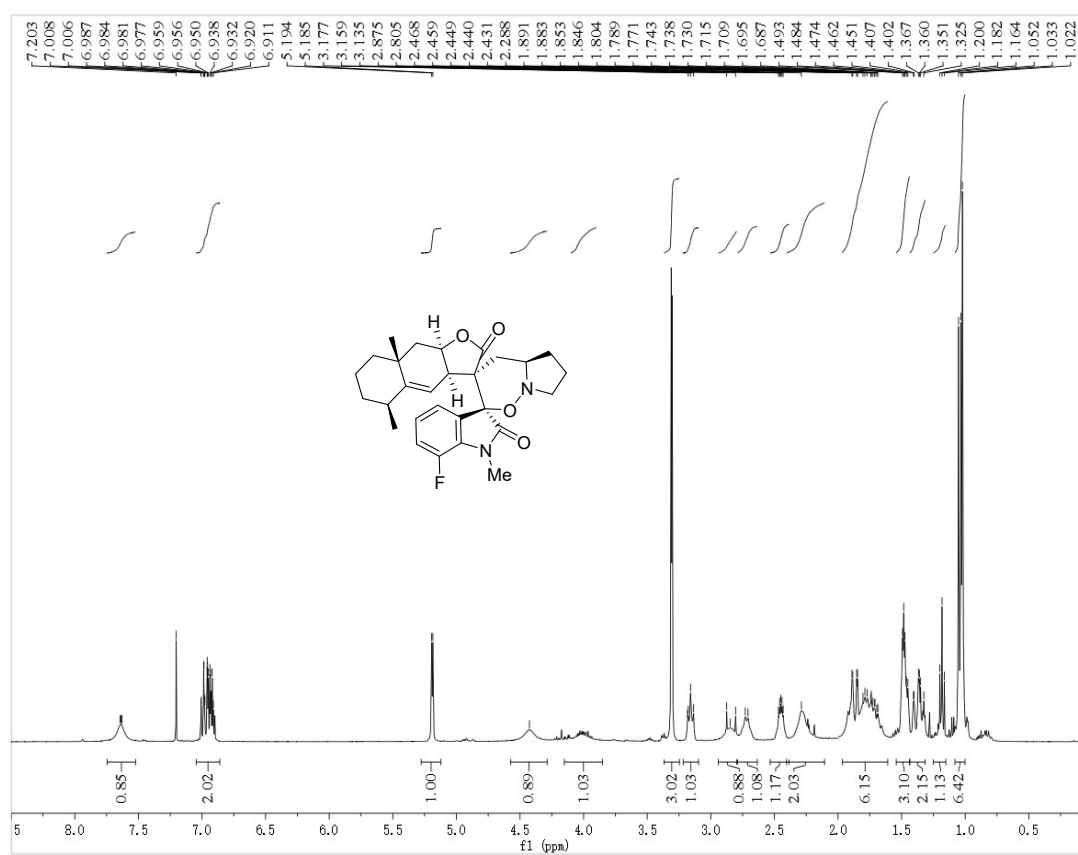

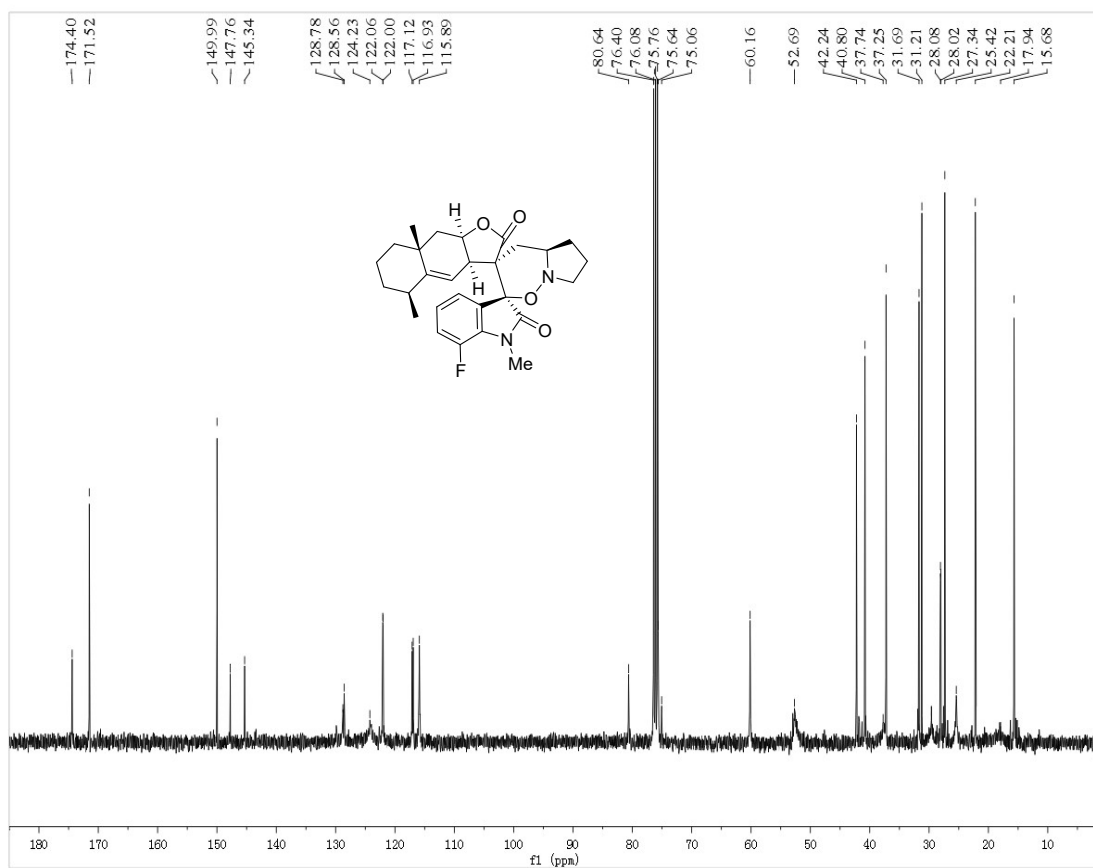

<sup>19</sup>F NMR of 3c

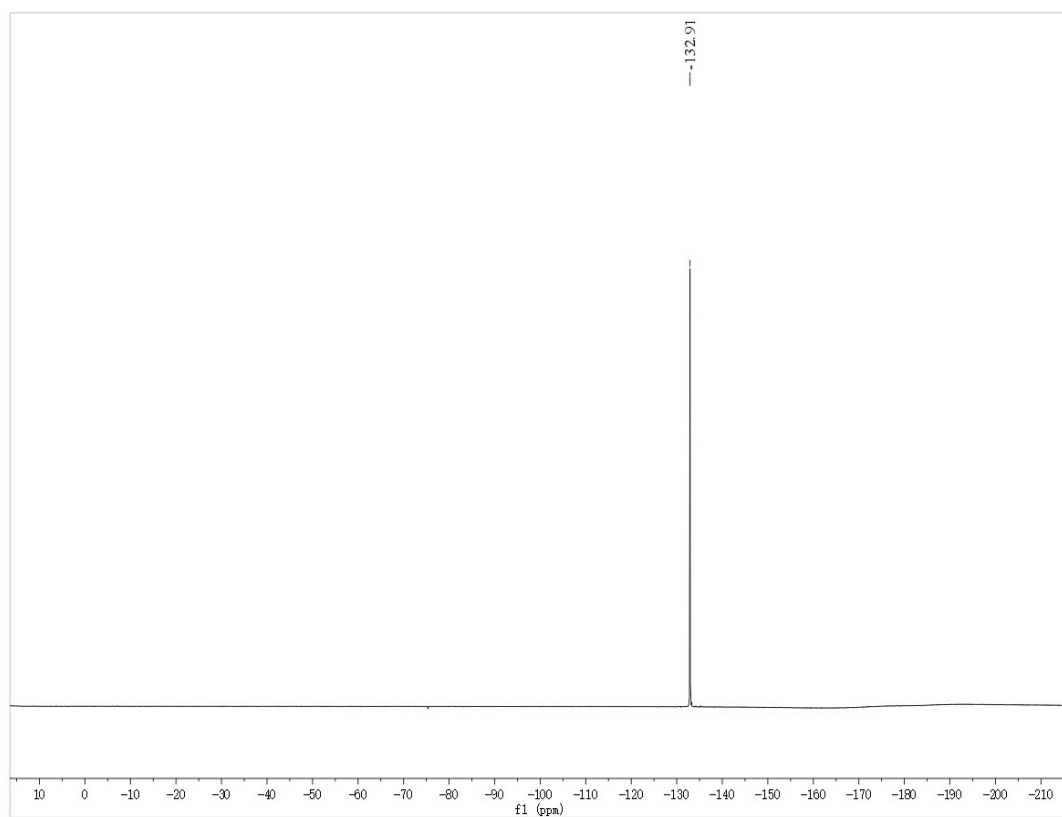

# **<sup>1</sup>H and <sup>13</sup>C NMR of 3d**

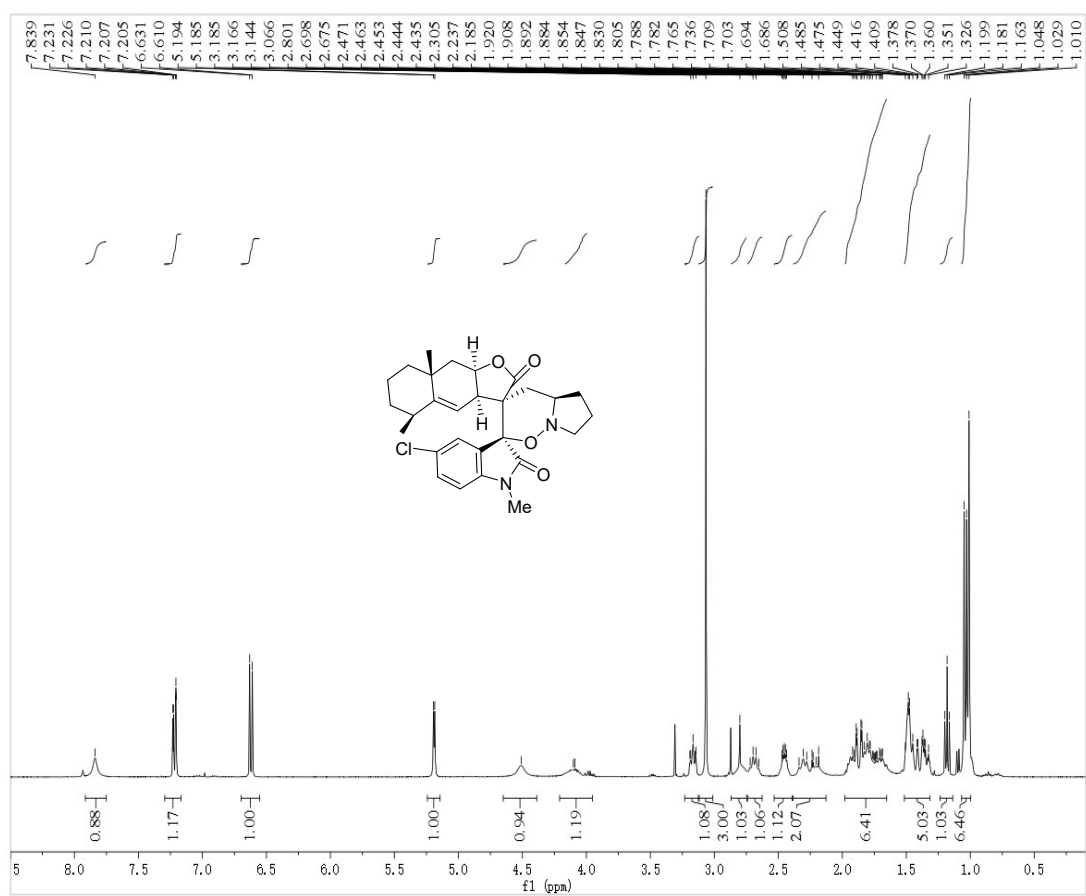

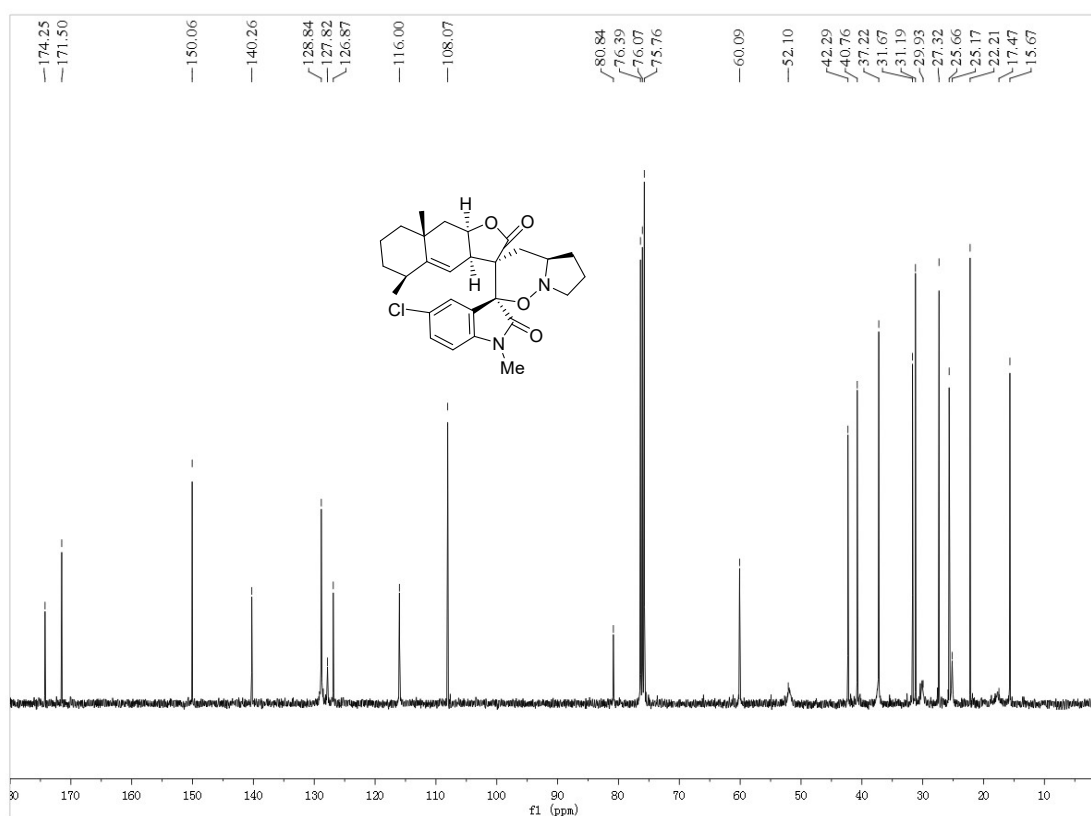

**<sup>1</sup>H and <sup>13</sup>C NMR of 3e**

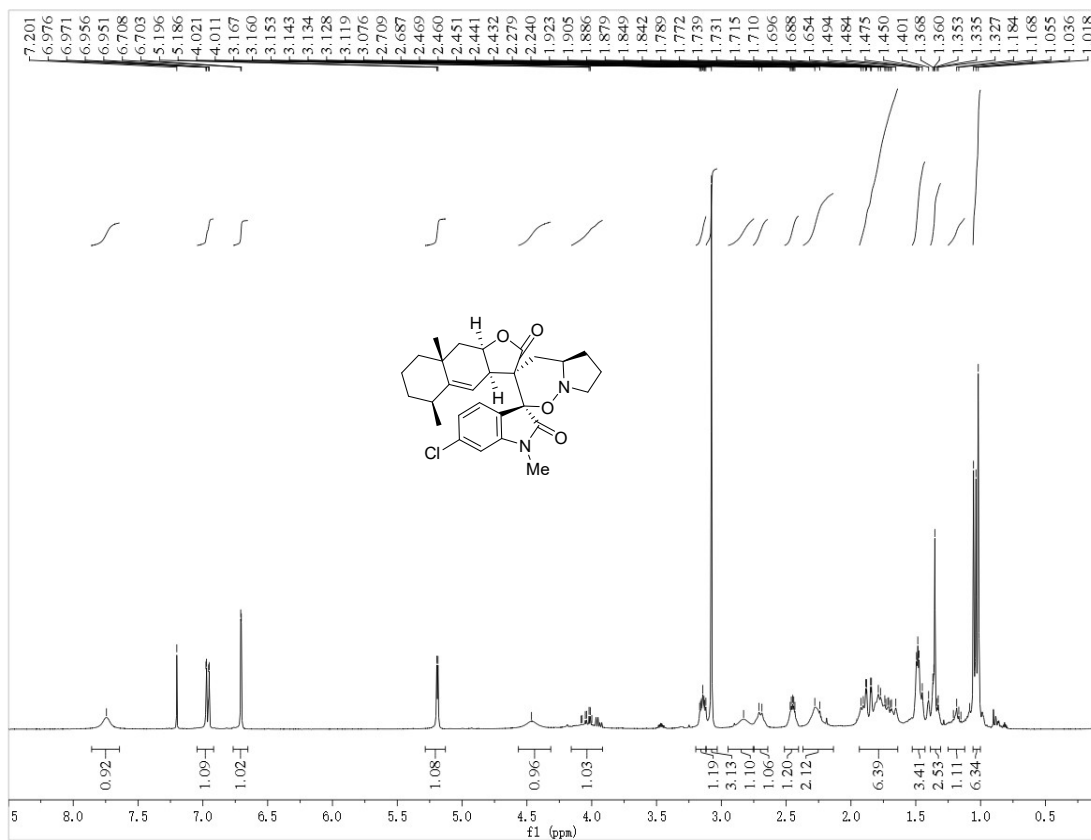

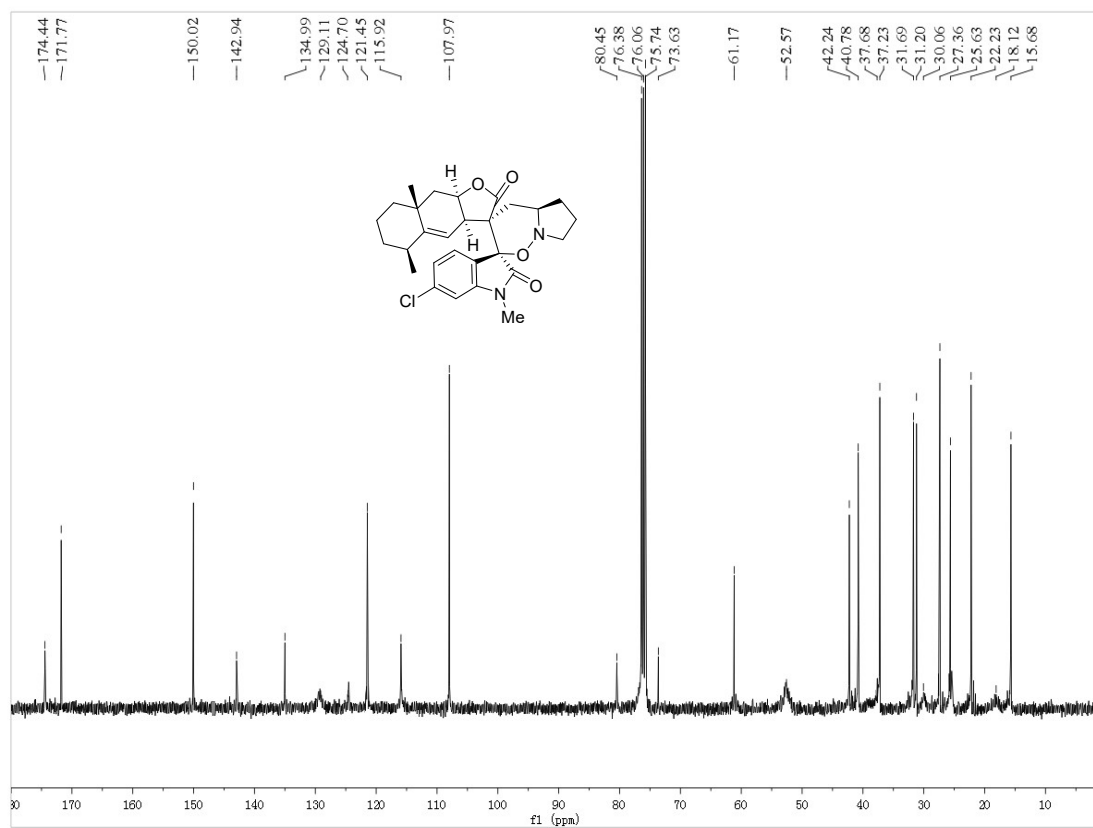

**<sup>1</sup>H and <sup>13</sup>C NMR of 3f**

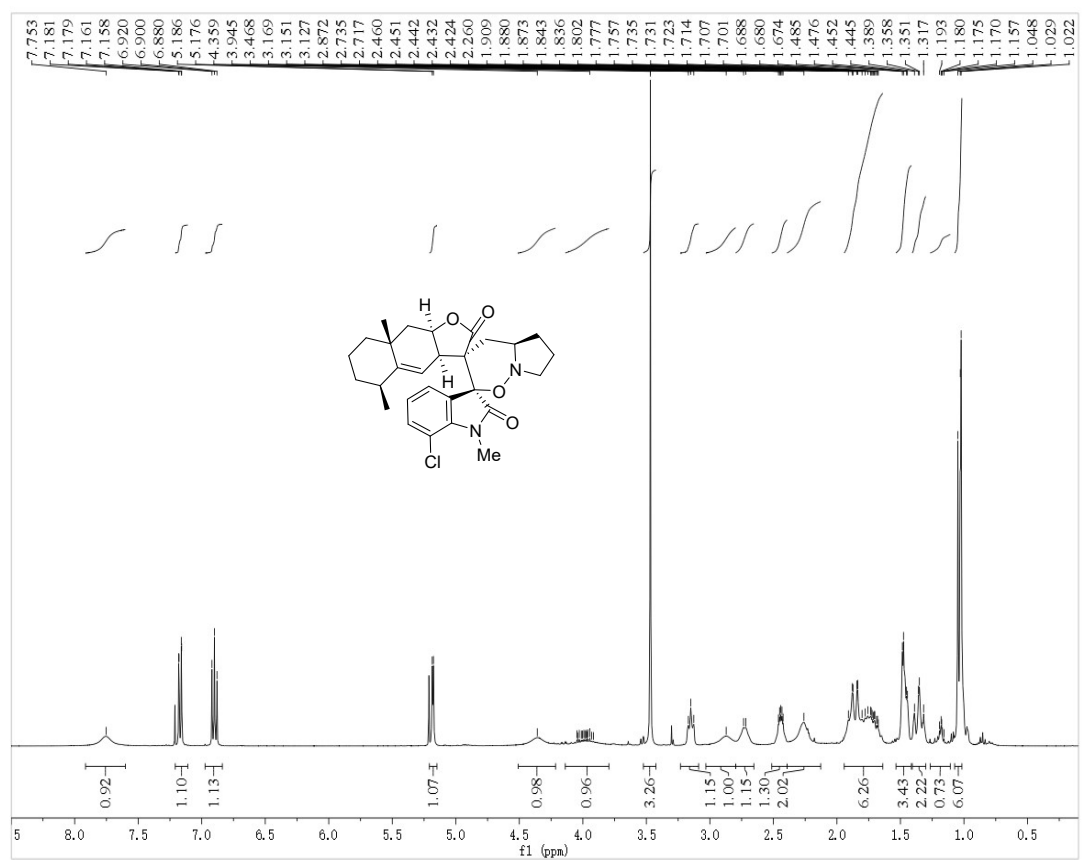

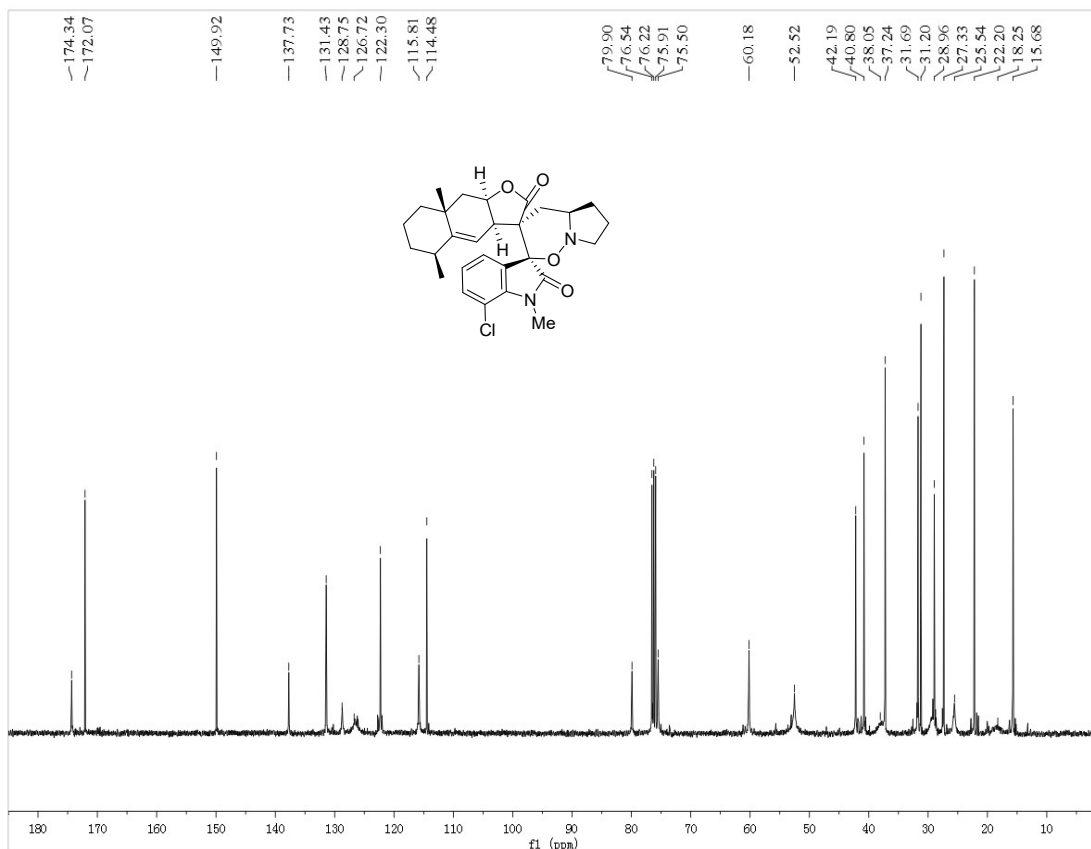

**<sup>1</sup>H and <sup>13</sup>C NMR of 3g**

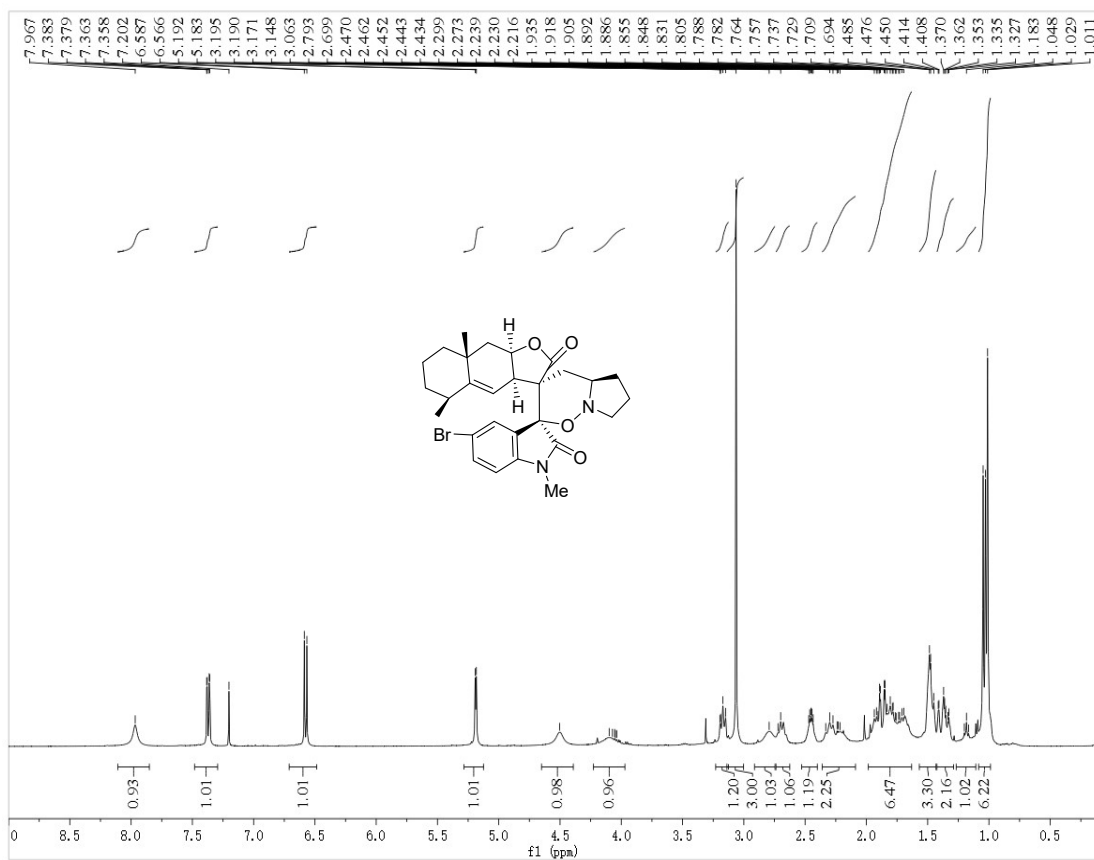

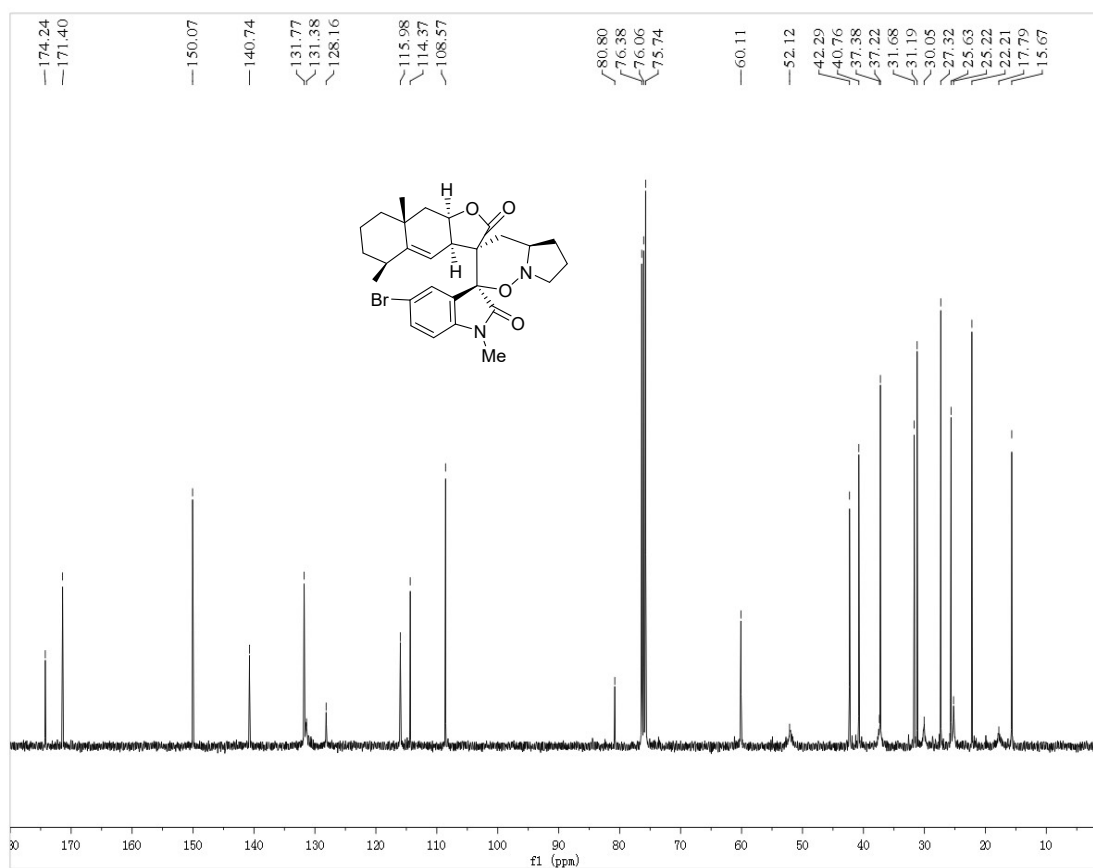

**<sup>1</sup>H and <sup>13</sup>C NMR of 3h**

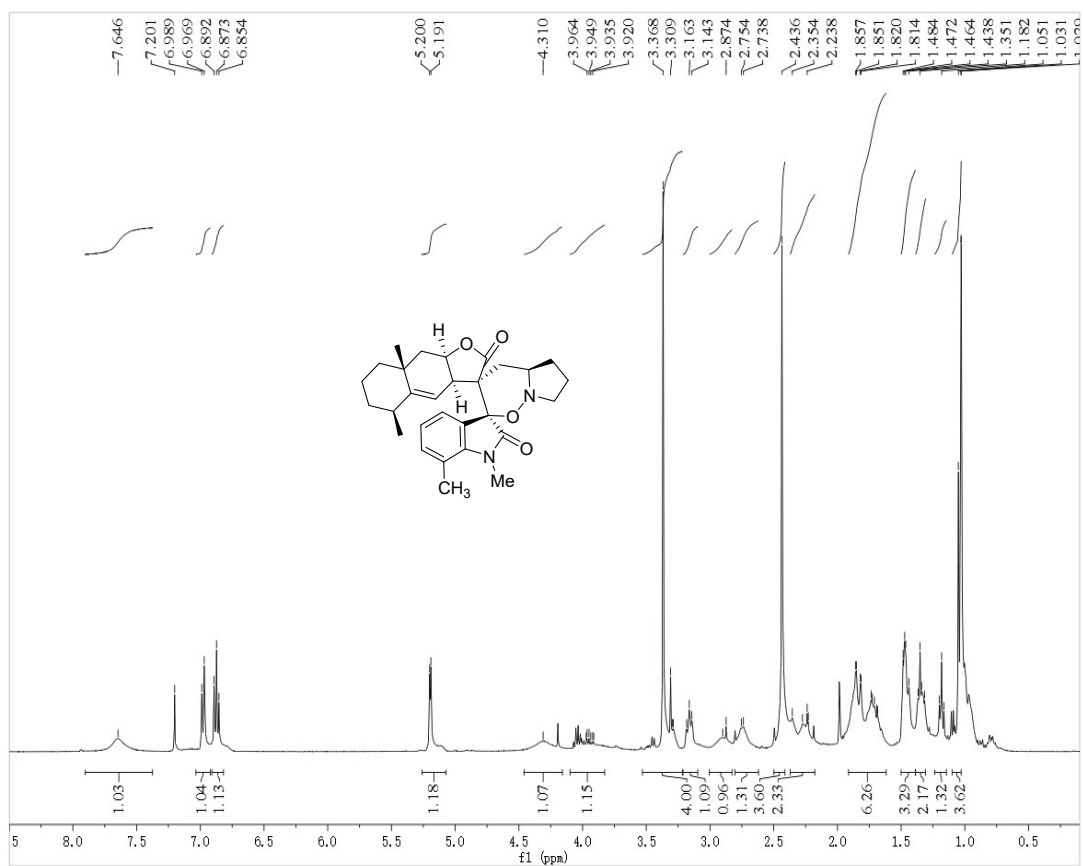

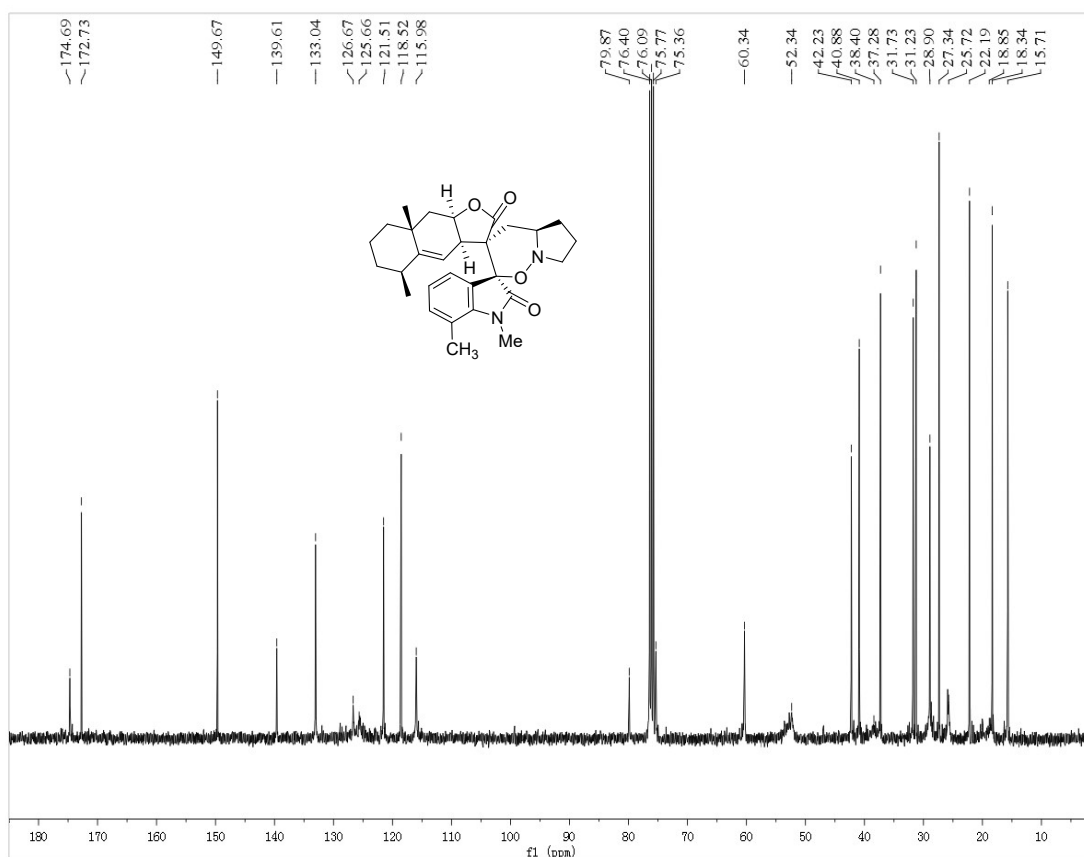

**<sup>1</sup>H and <sup>13</sup>C NMR of 3i**

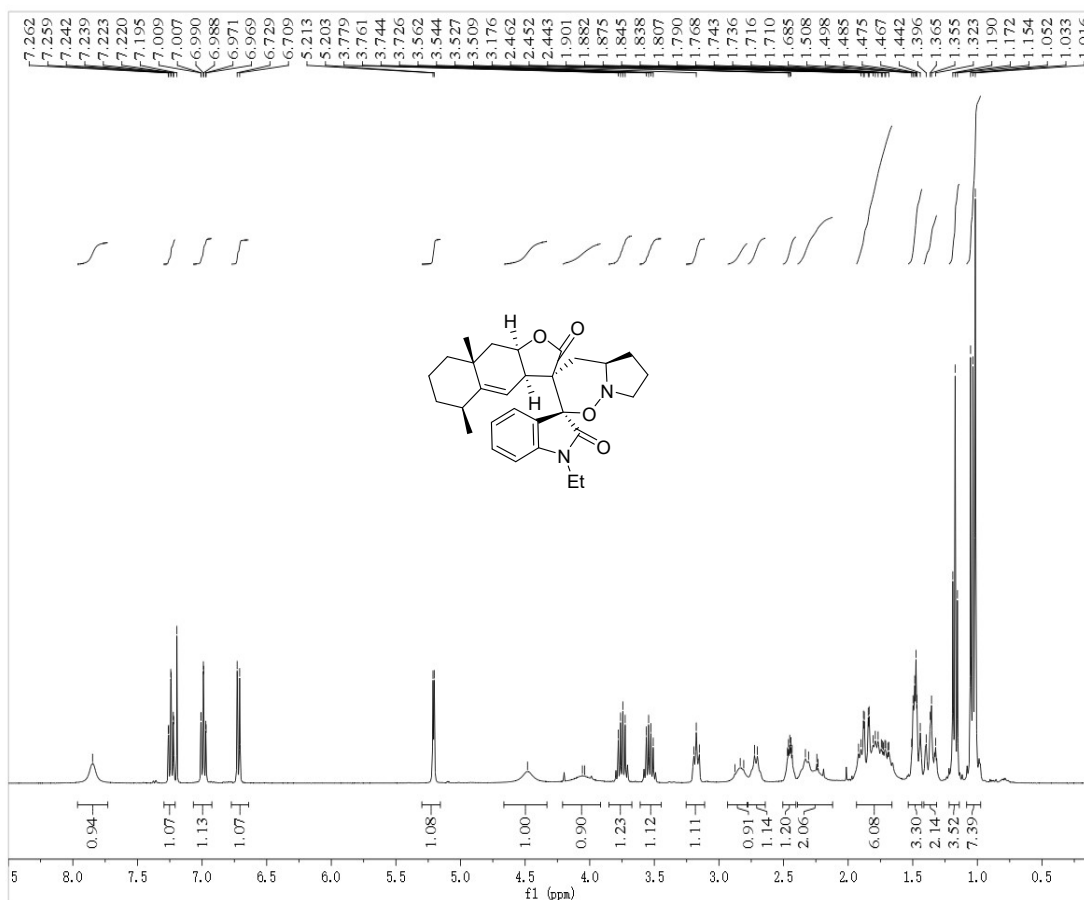



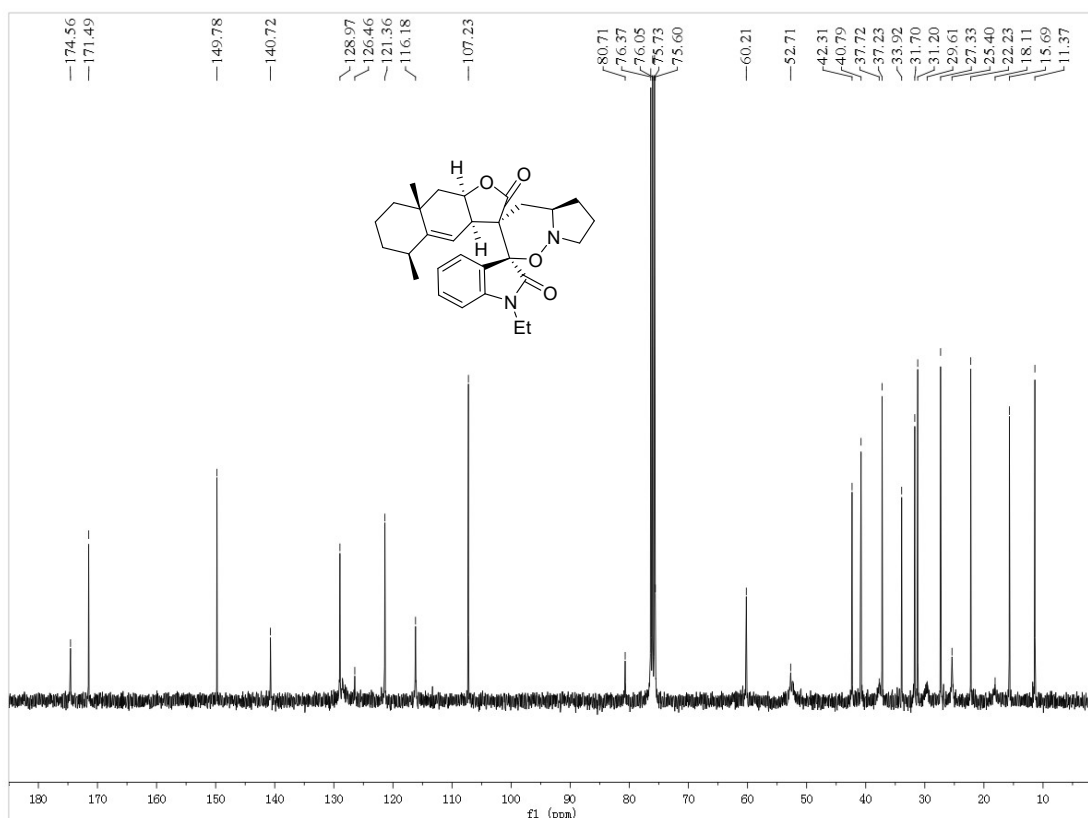

**<sup>1</sup>H and <sup>13</sup>C NMR of 3j**

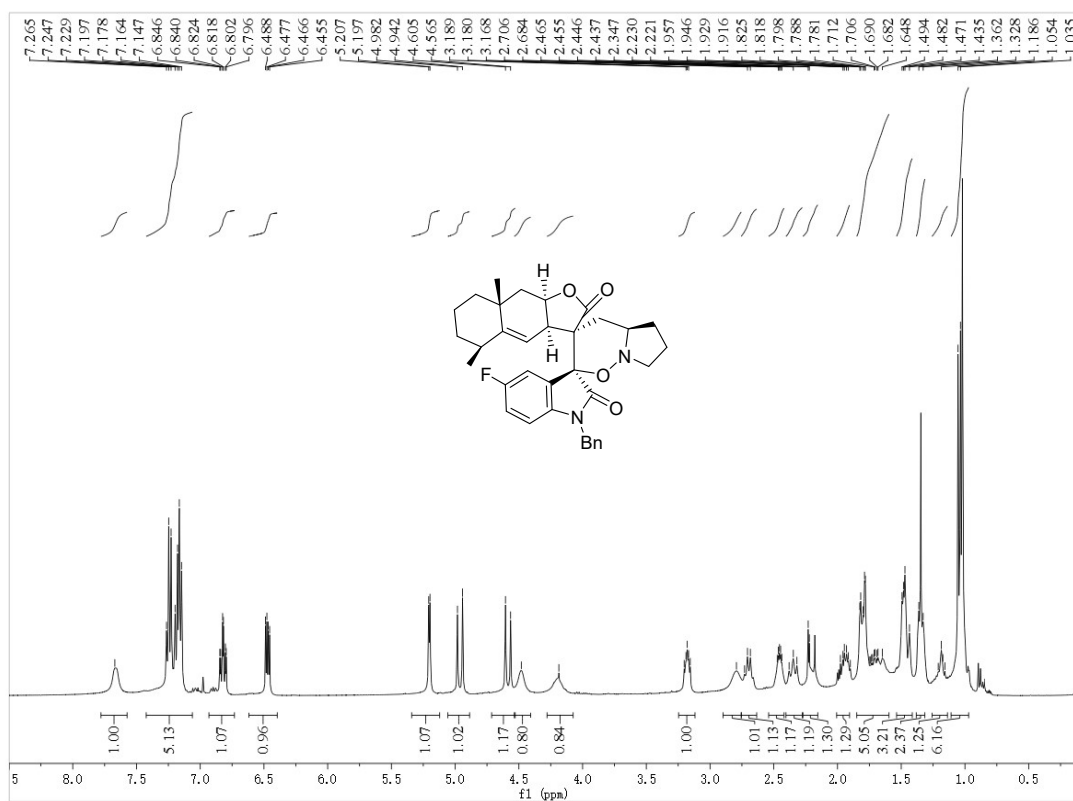

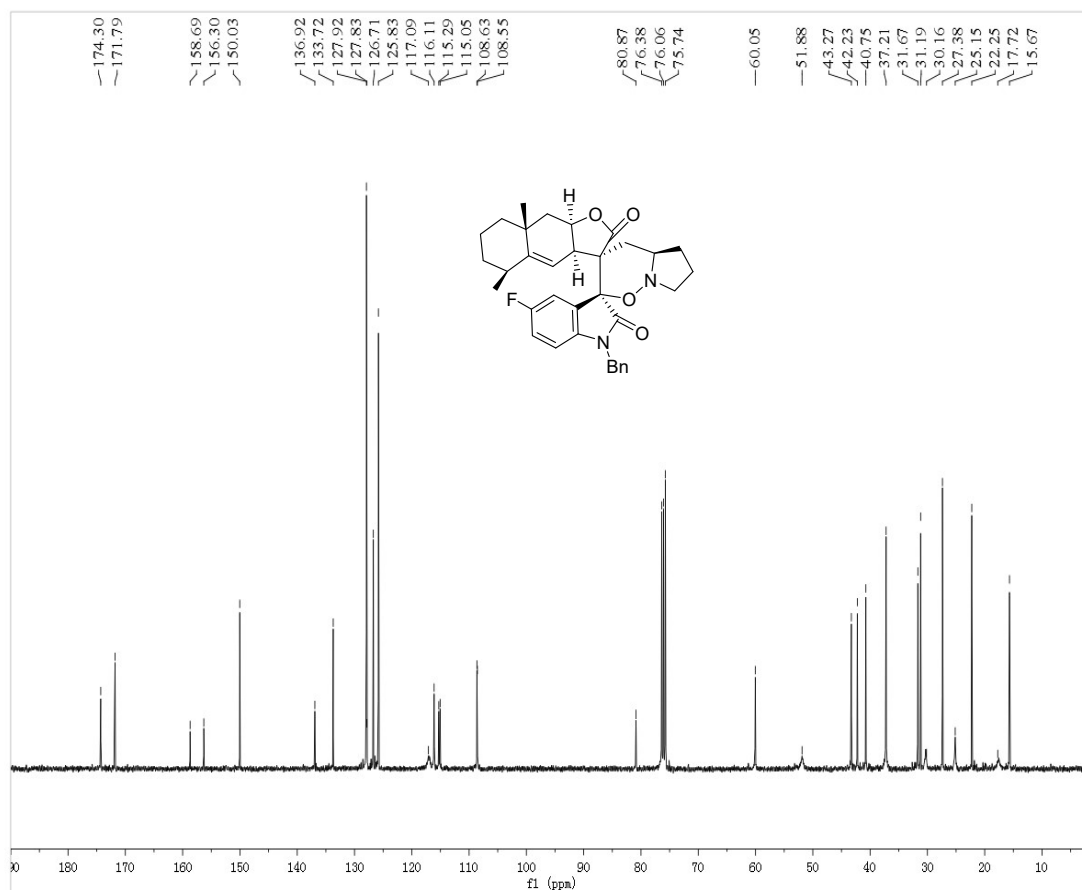

**<sup>19</sup>F NMR of 3j**

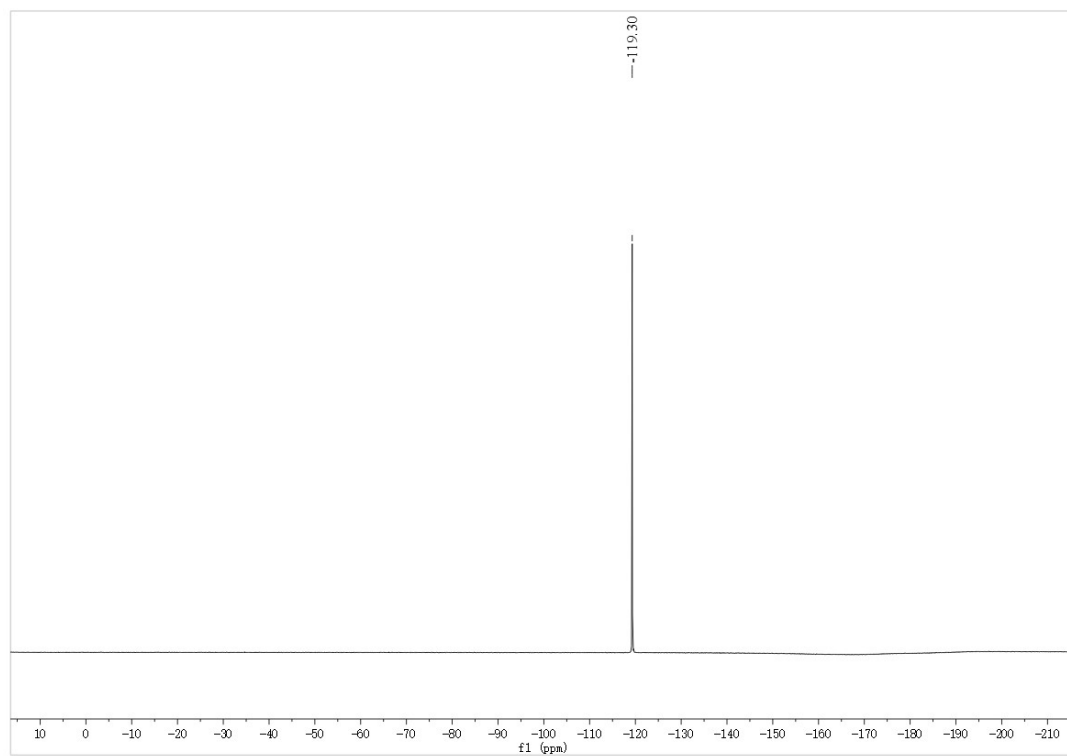

**<sup>1</sup>H and <sup>13</sup>C NMR of 3k**

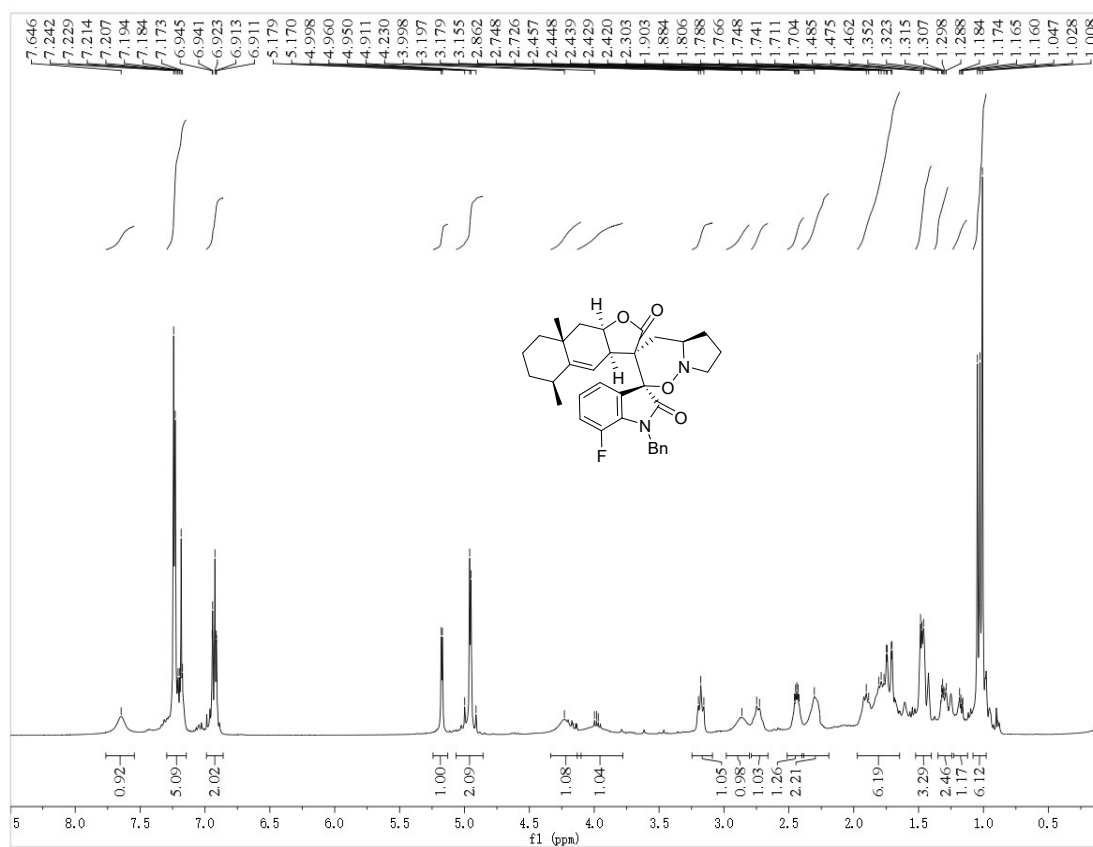

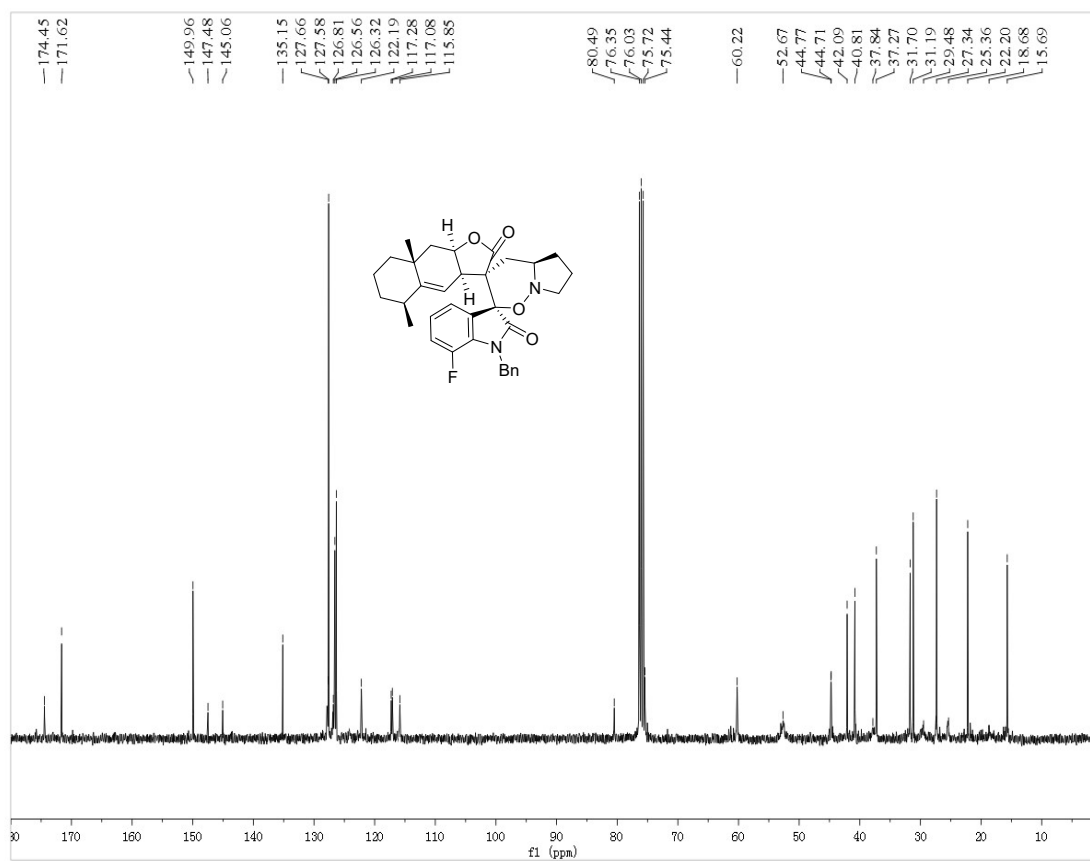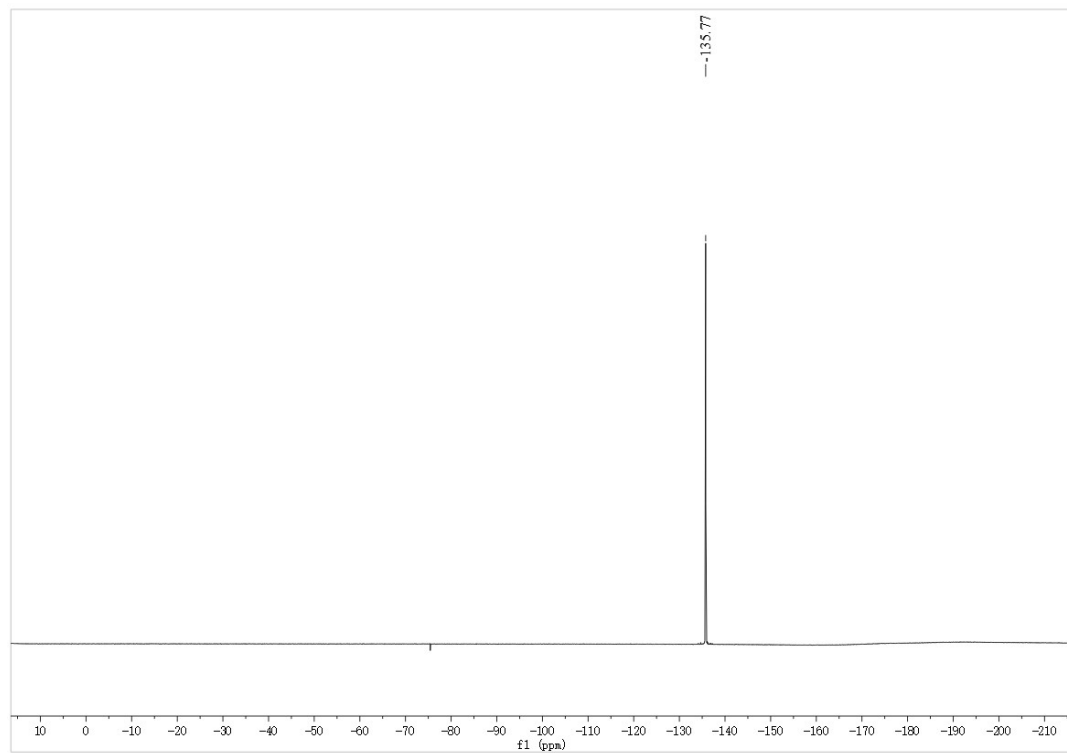

**$^1\text{H}$  and  $^{13}\text{C}$  NMR of 3l**

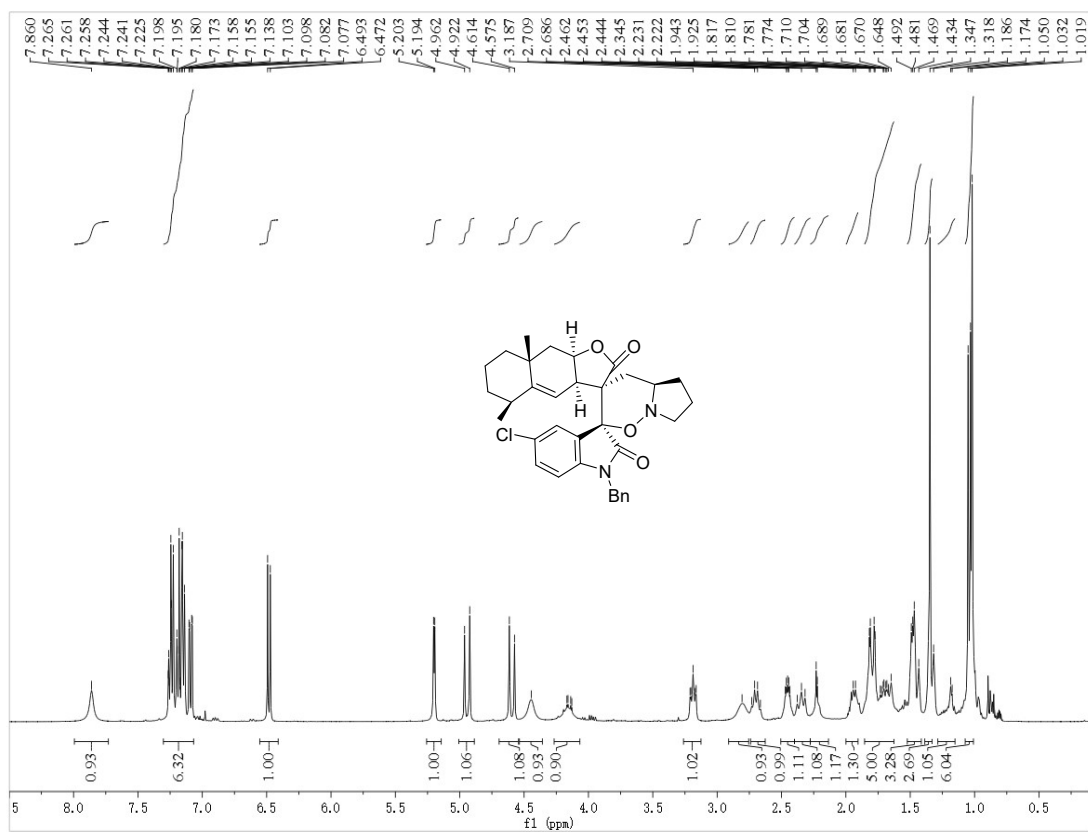

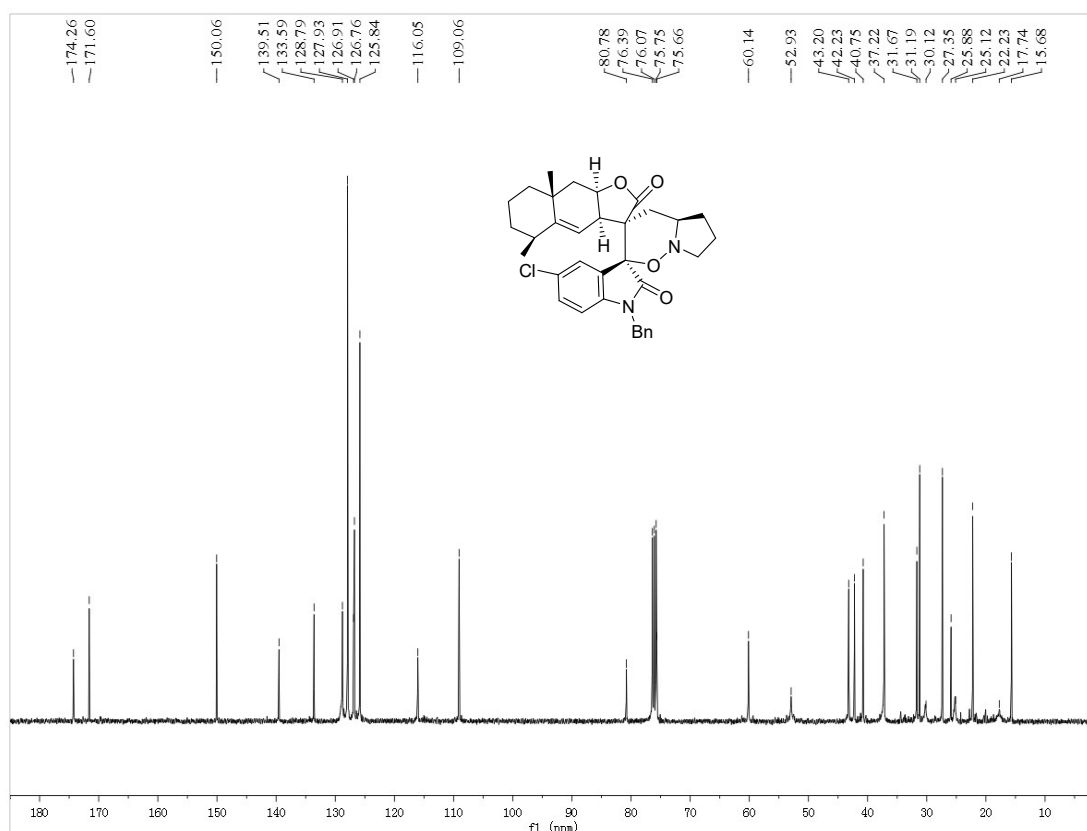

**<sup>1</sup>H and <sup>13</sup>C NMR of 3m**

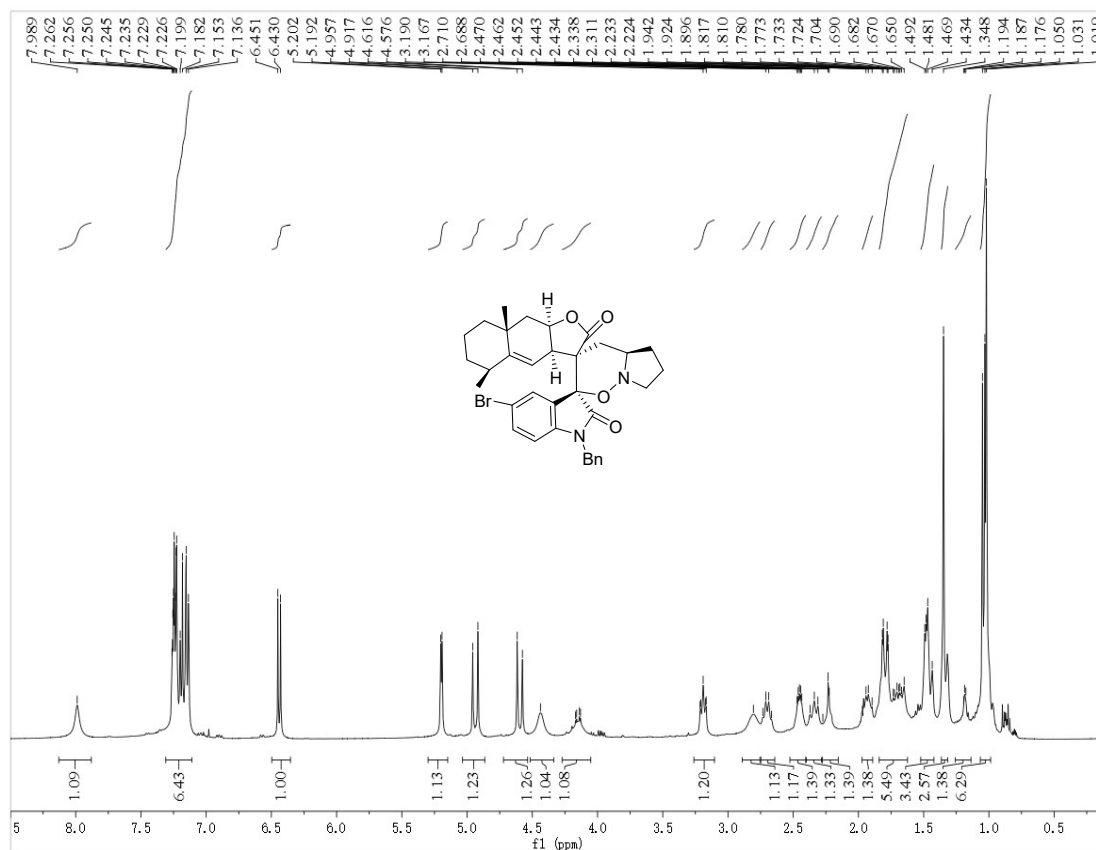

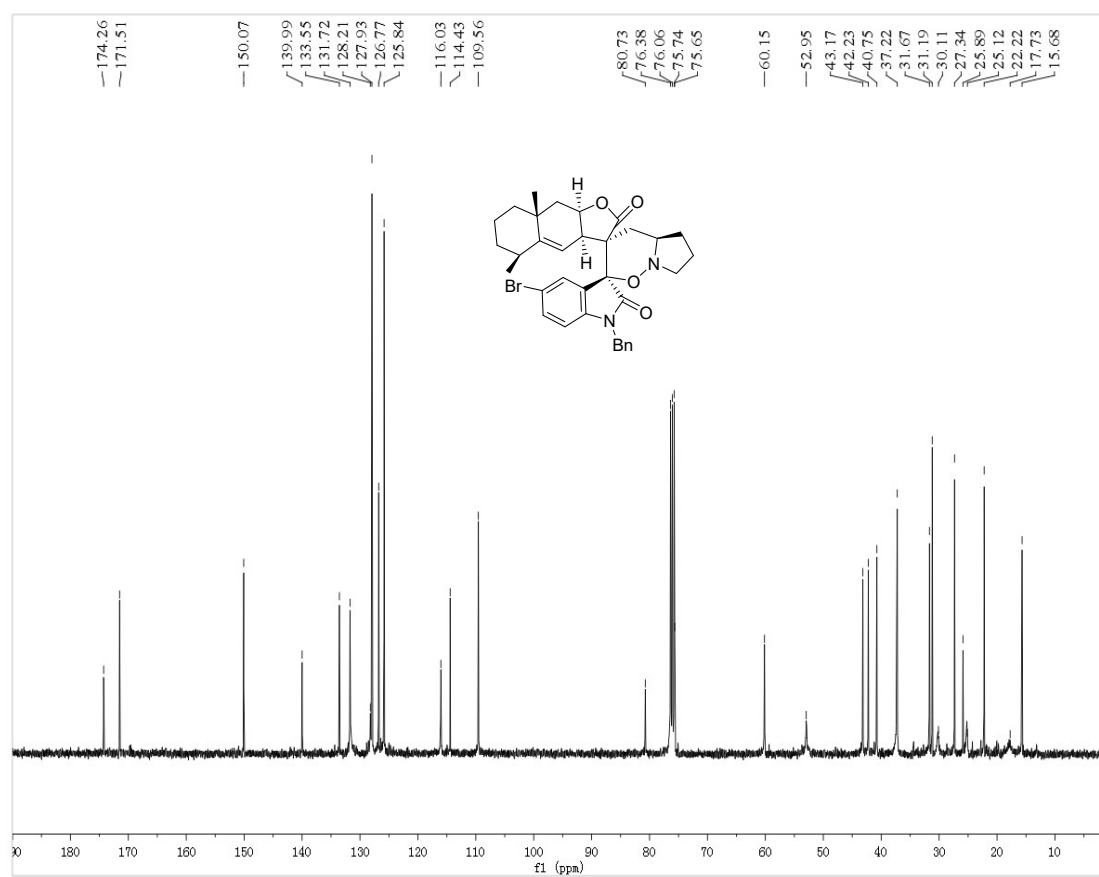

**<sup>1</sup>H and <sup>13</sup>C NMR of 3n**

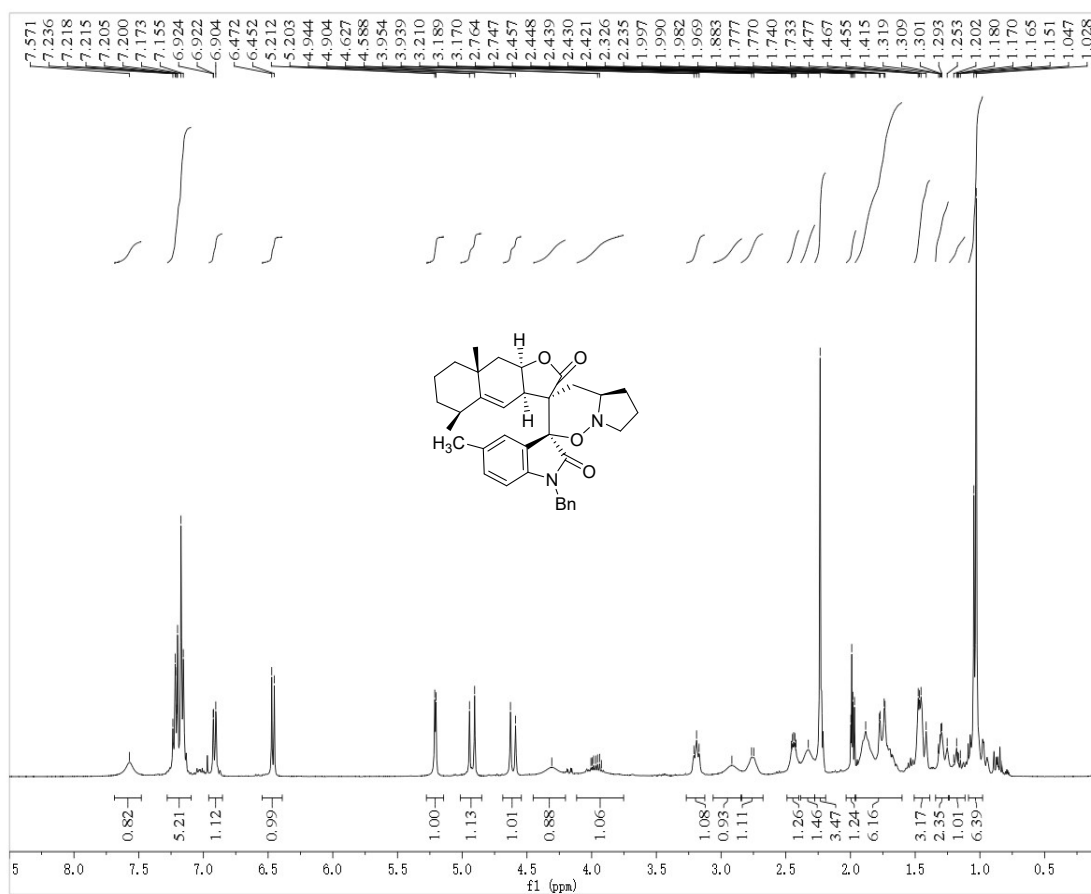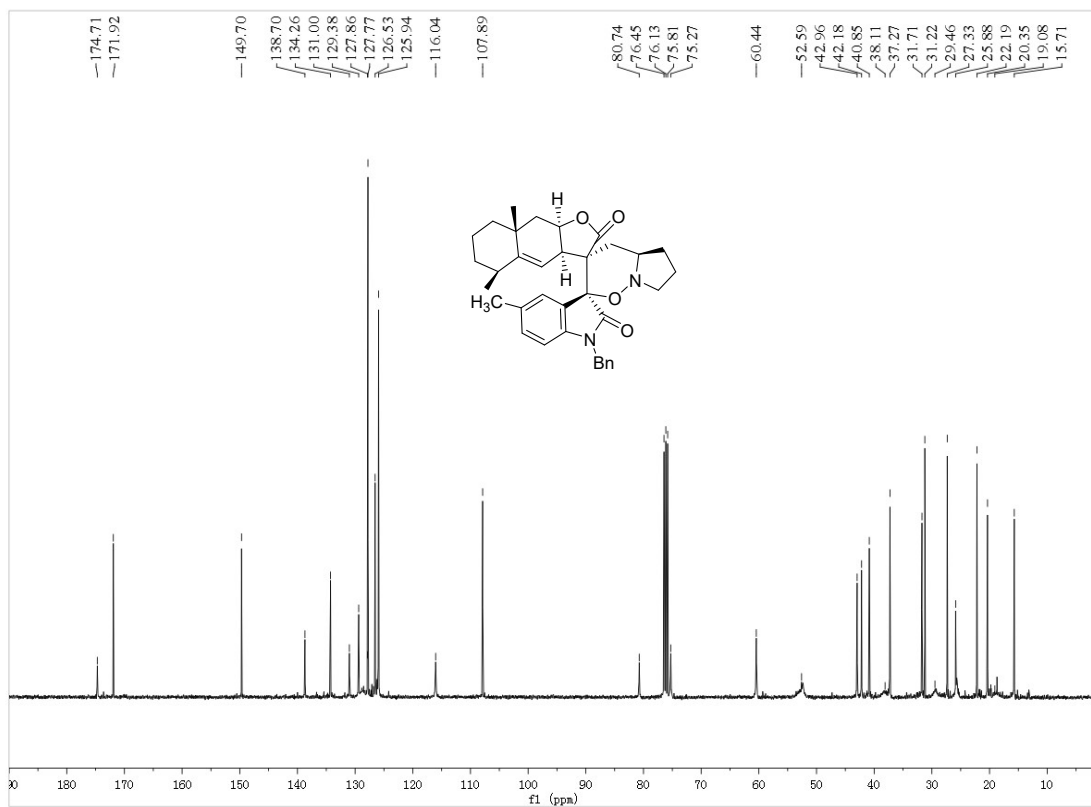

**<sup>1</sup>H and <sup>13</sup>C NMR of 3o**



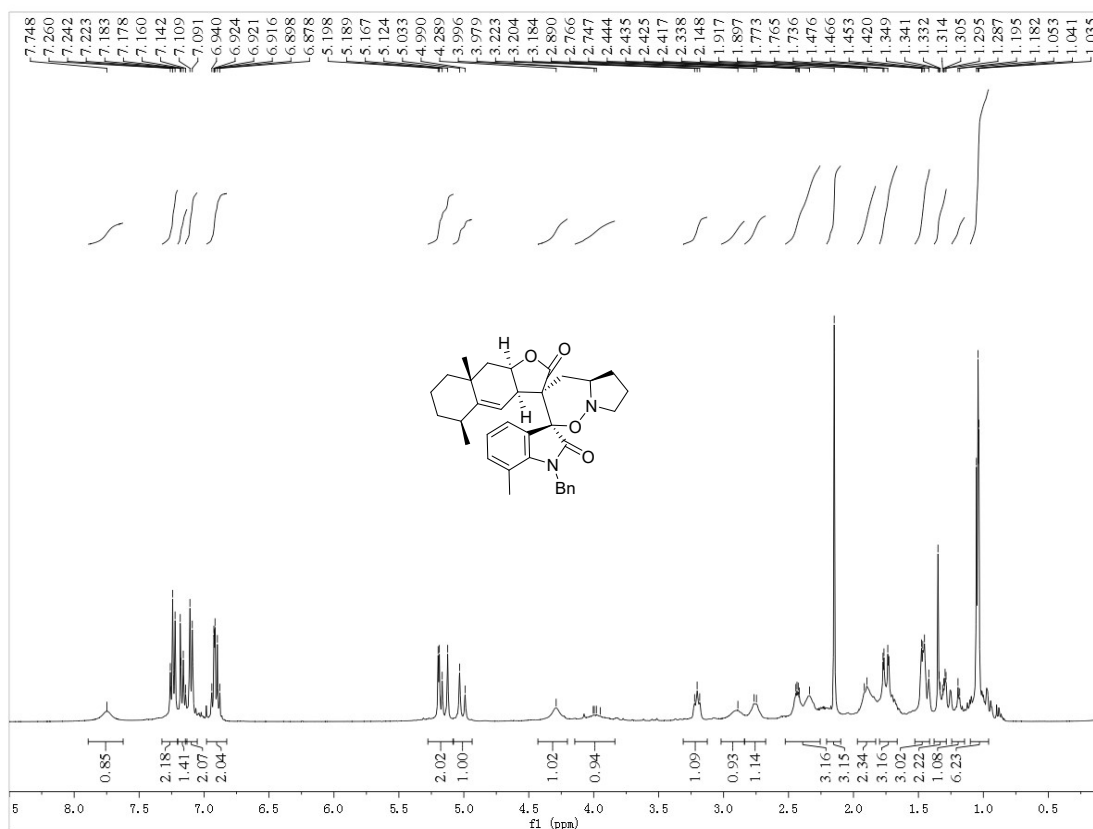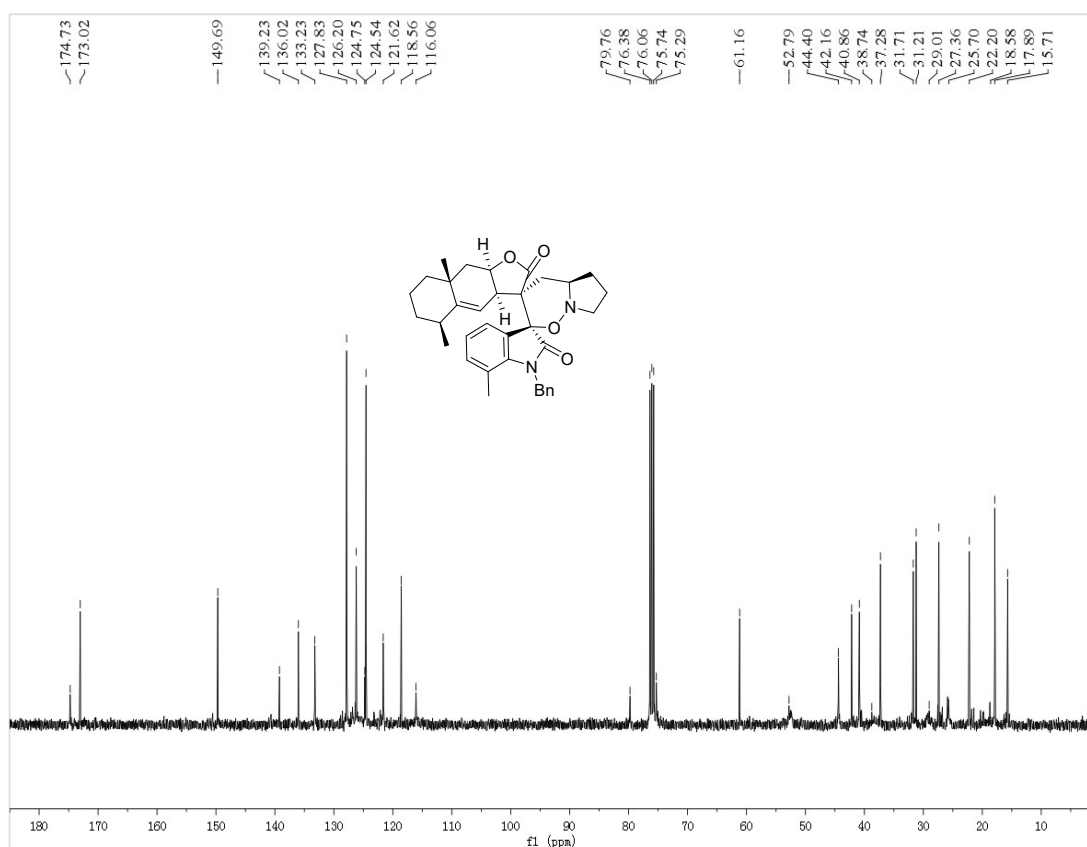

**<sup>1</sup>H and <sup>13</sup>C NMR of 3p**

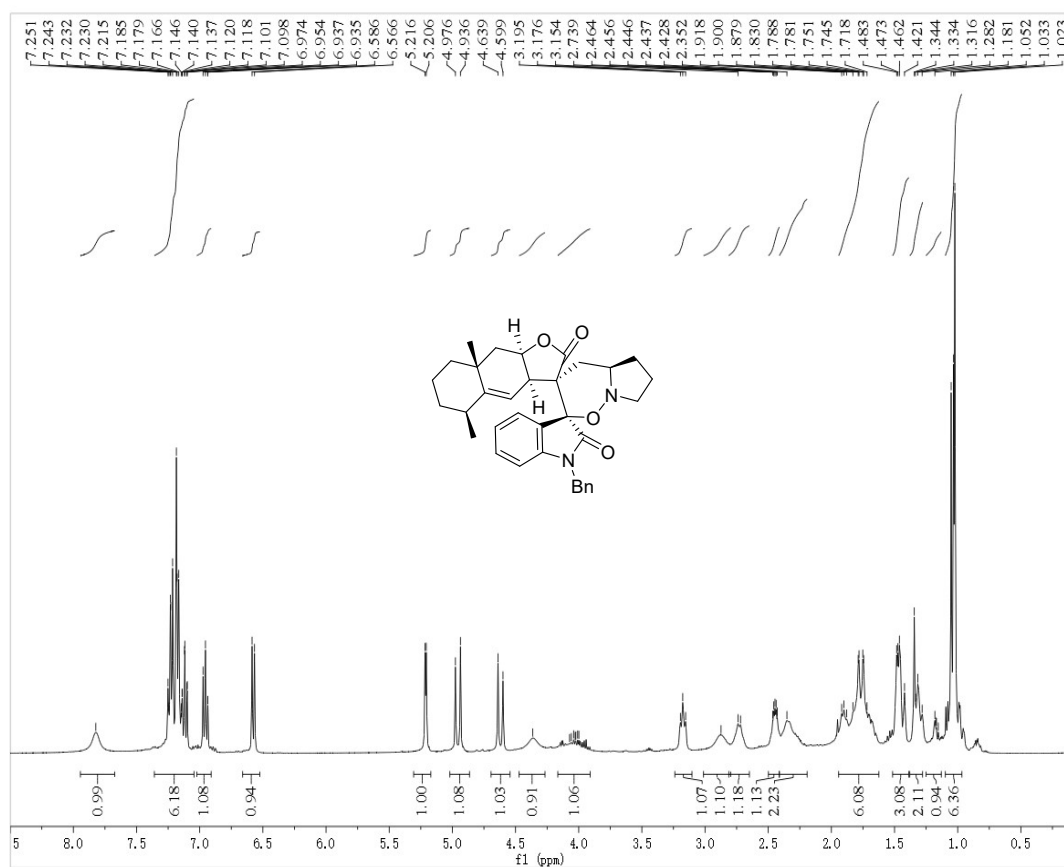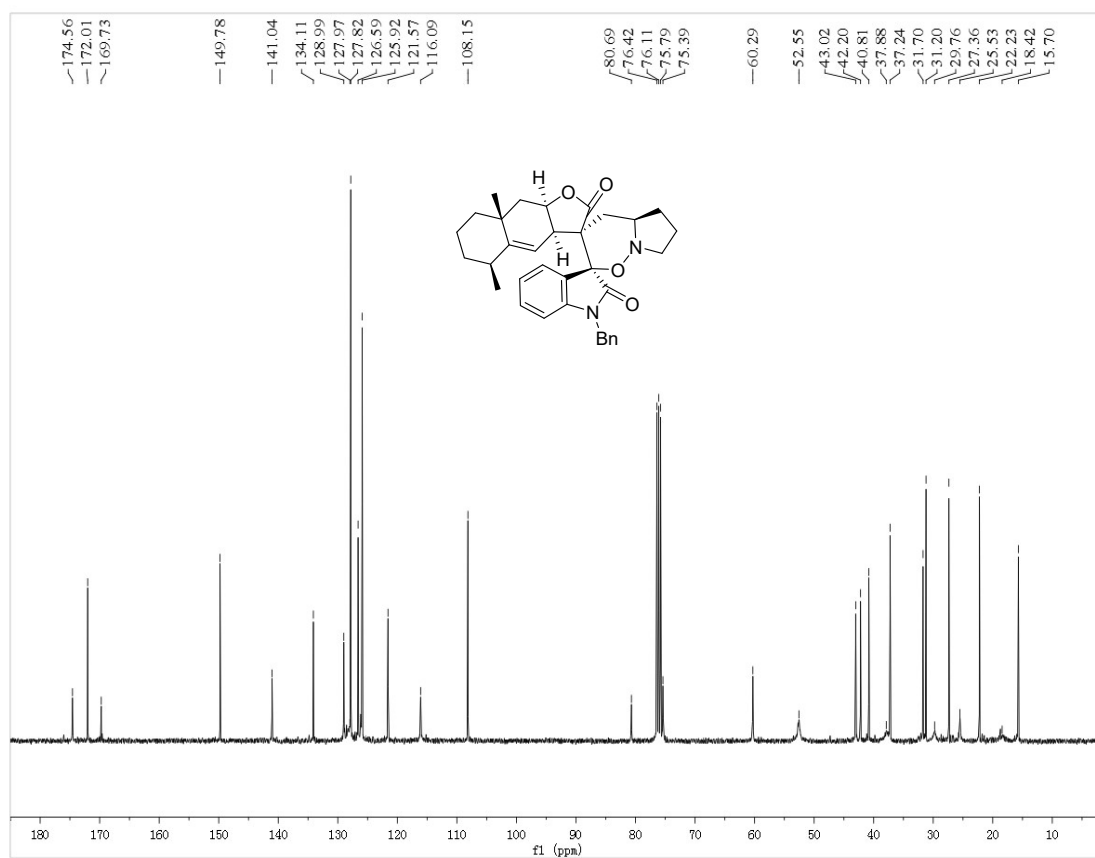

**<sup>1</sup>H and <sup>13</sup>C NMR of 5a**

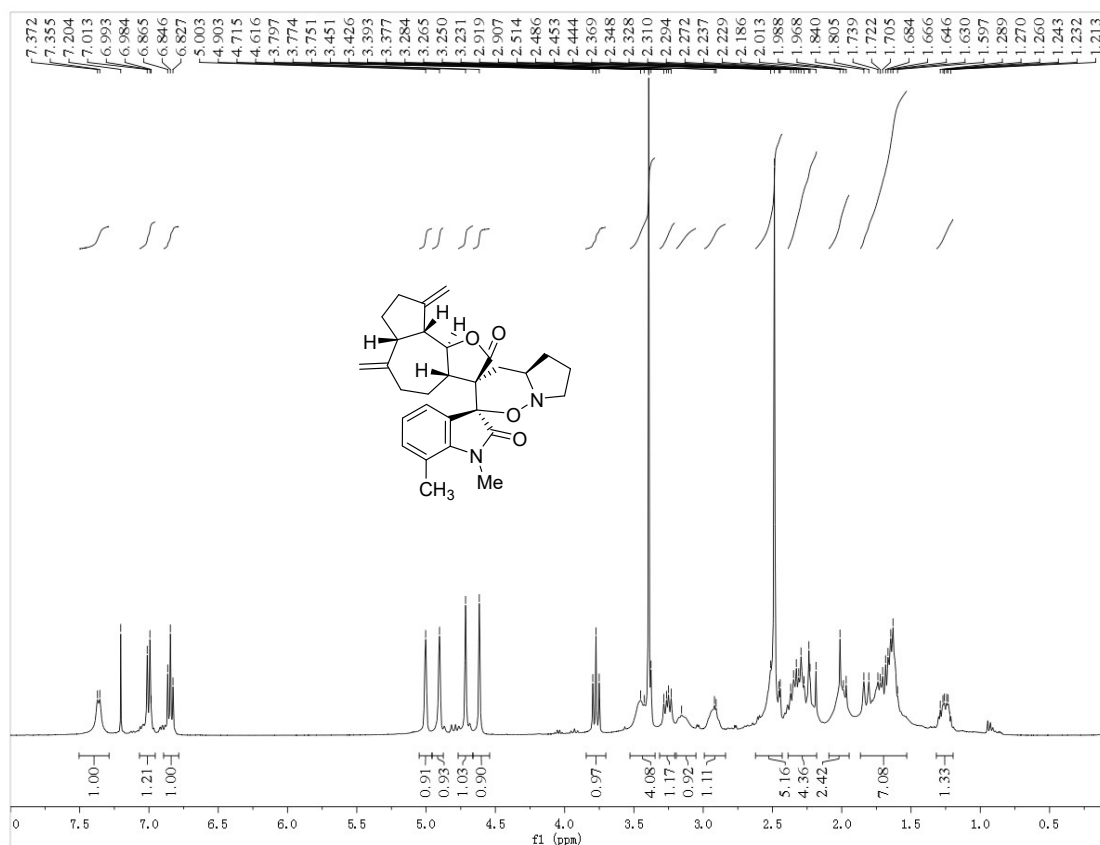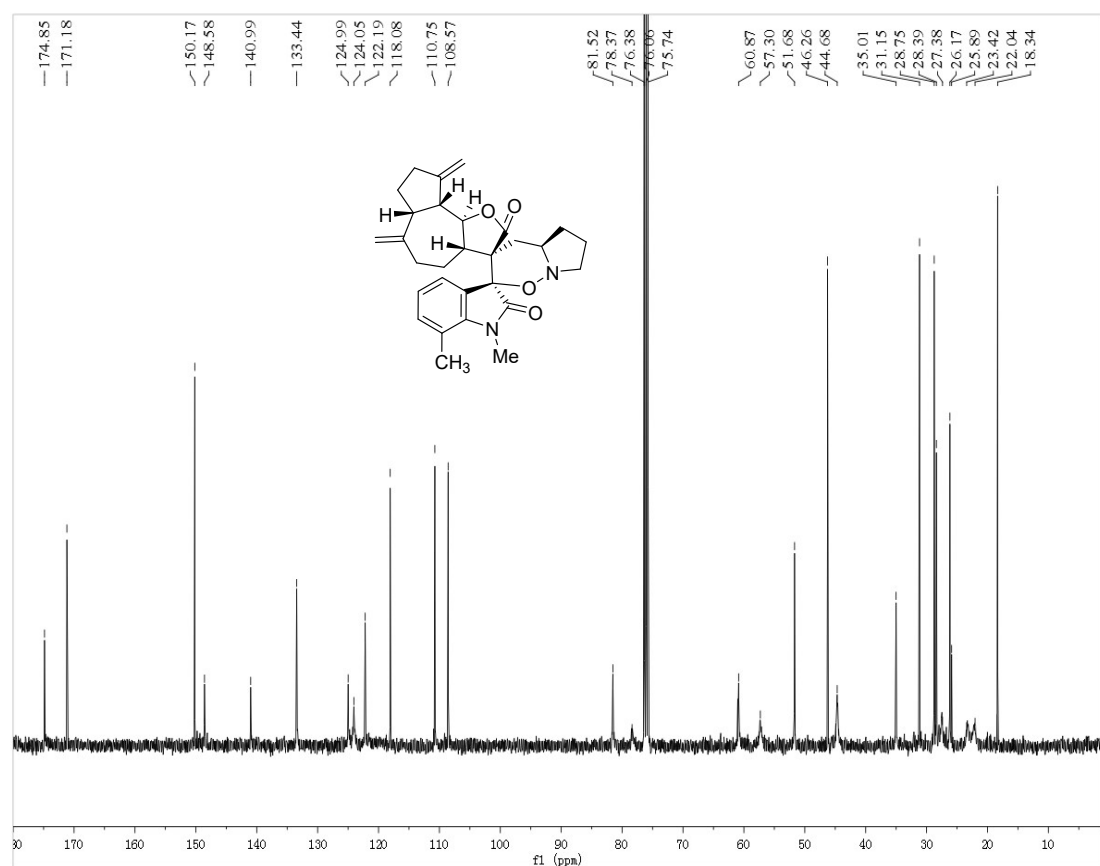

**<sup>1</sup>H and <sup>13</sup>C NMR of 5b**



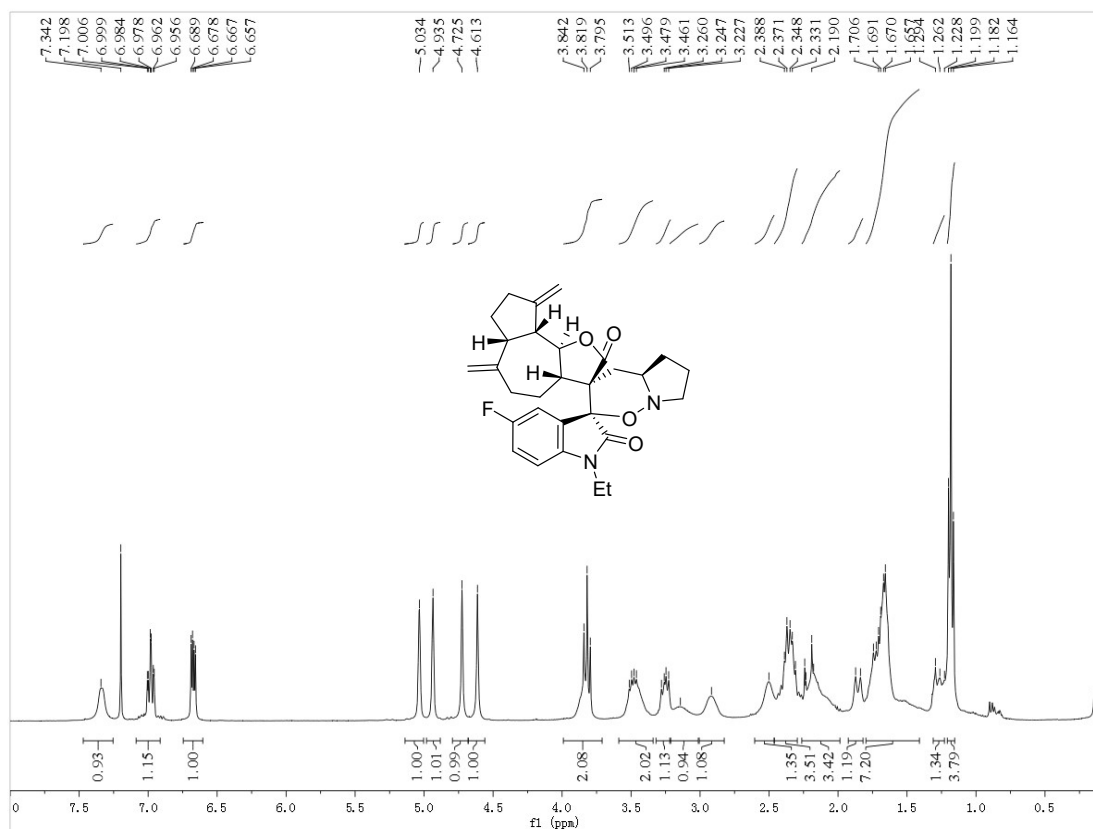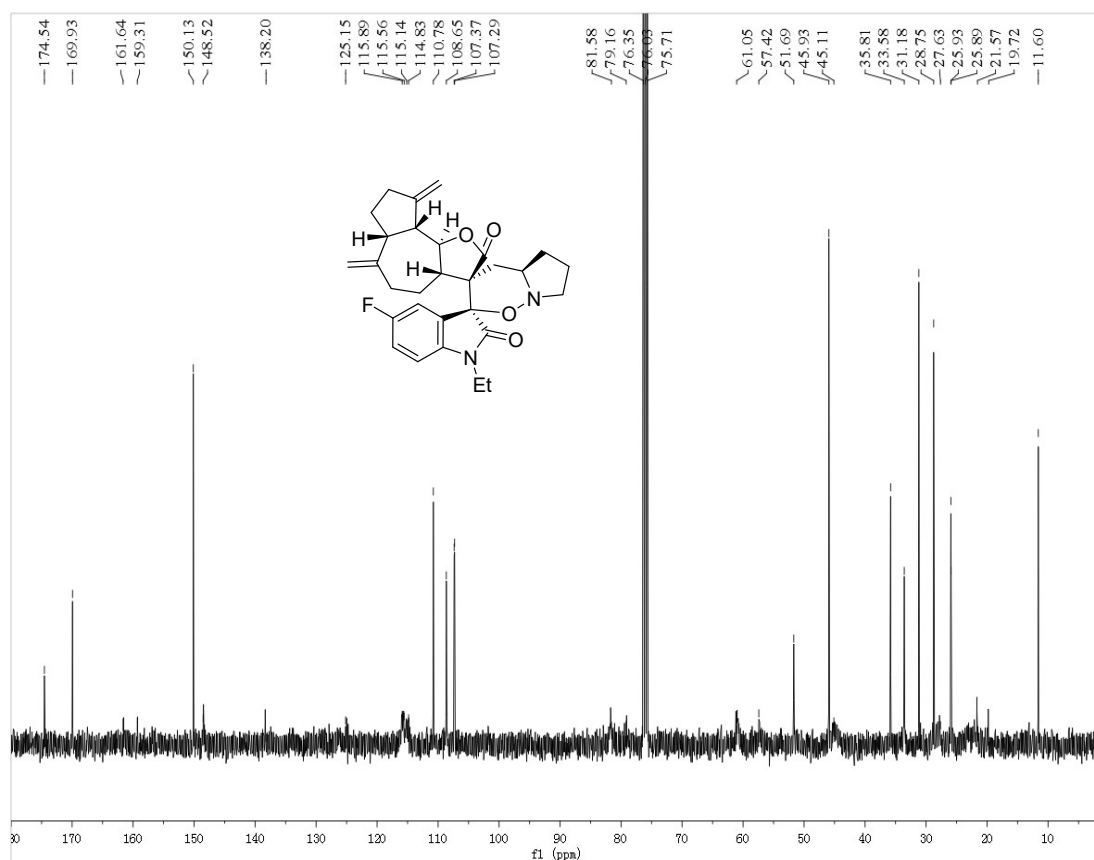

**<sup>19</sup>F NMR of 5c**

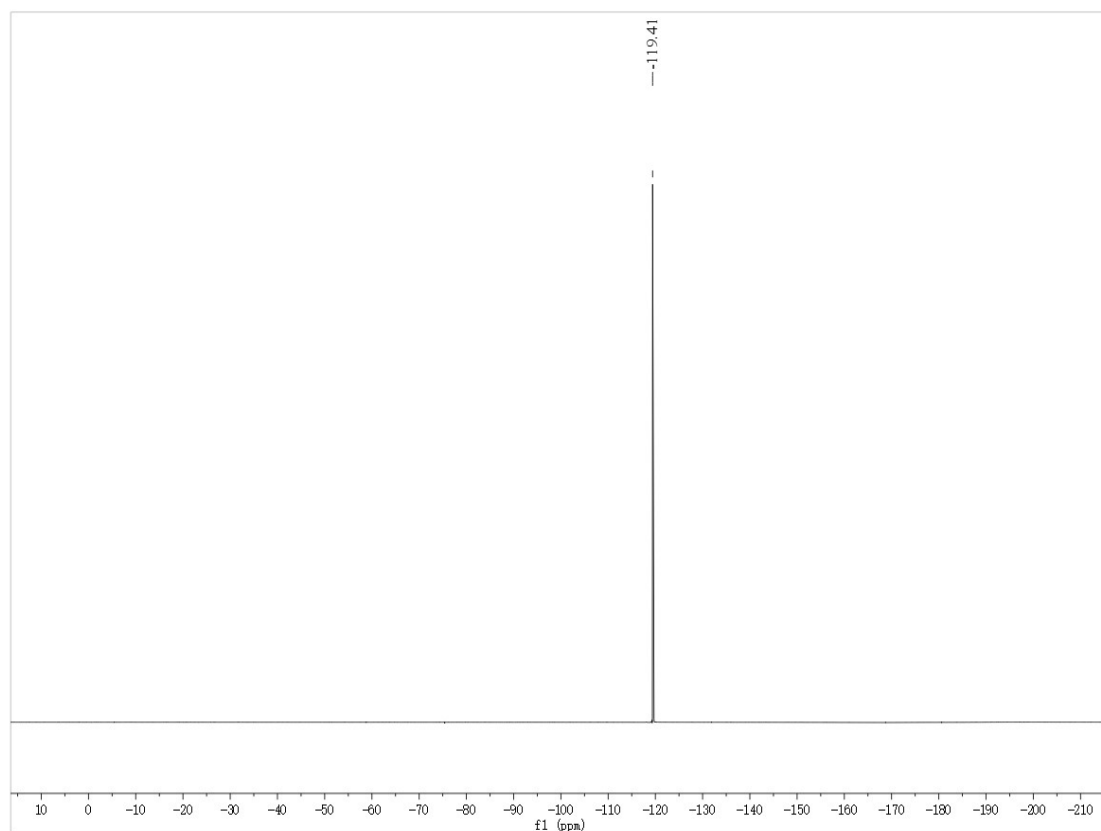

**$^1\text{H}$  and  $^{13}\text{C}$  NMR of 5d**

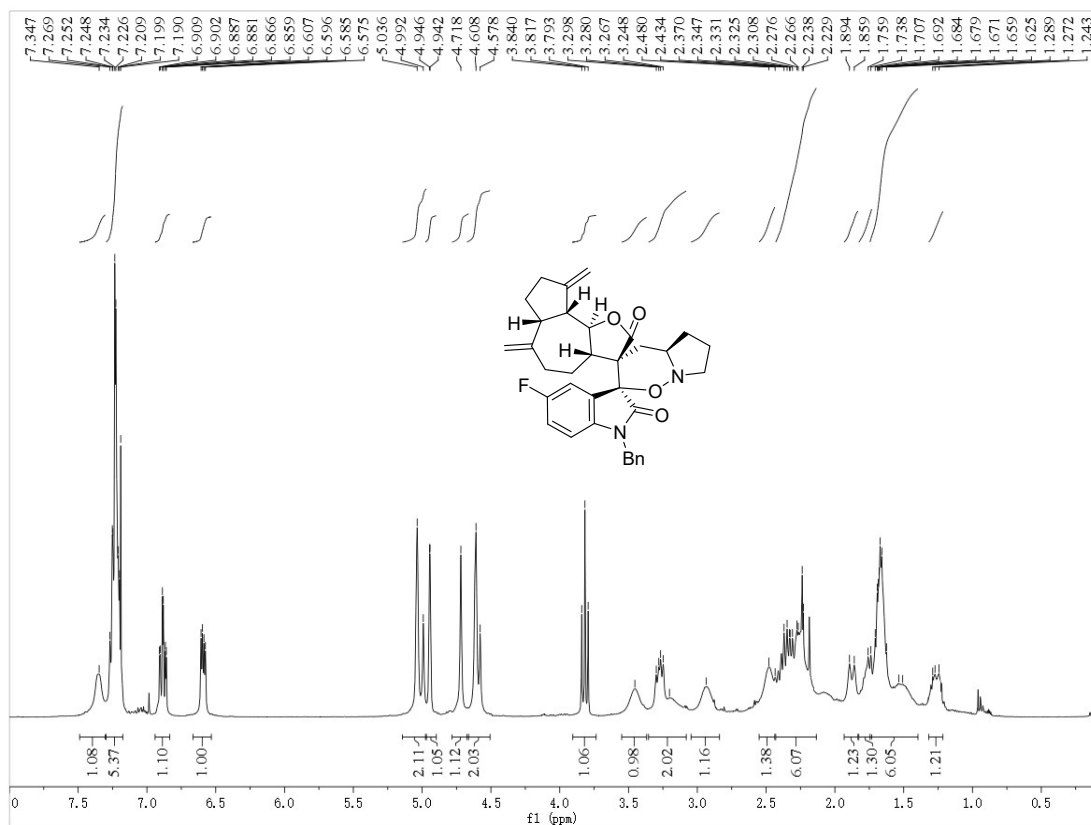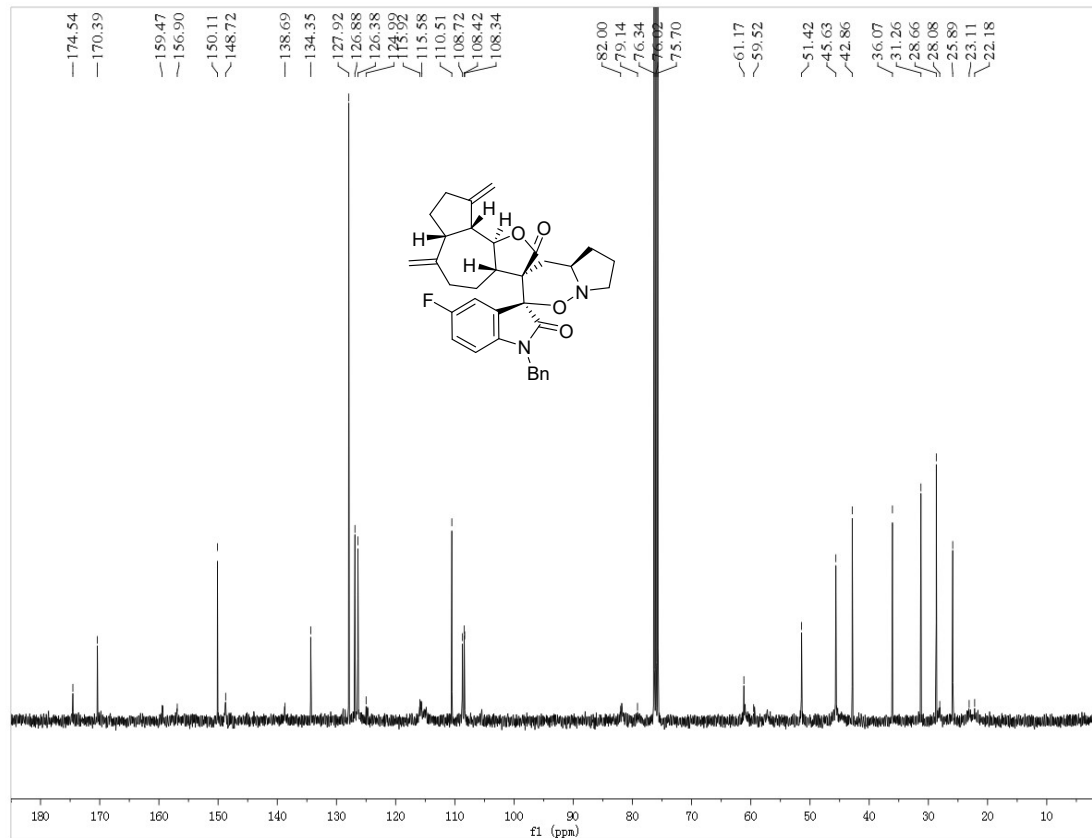

**<sup>19</sup>F NMR of 5d**

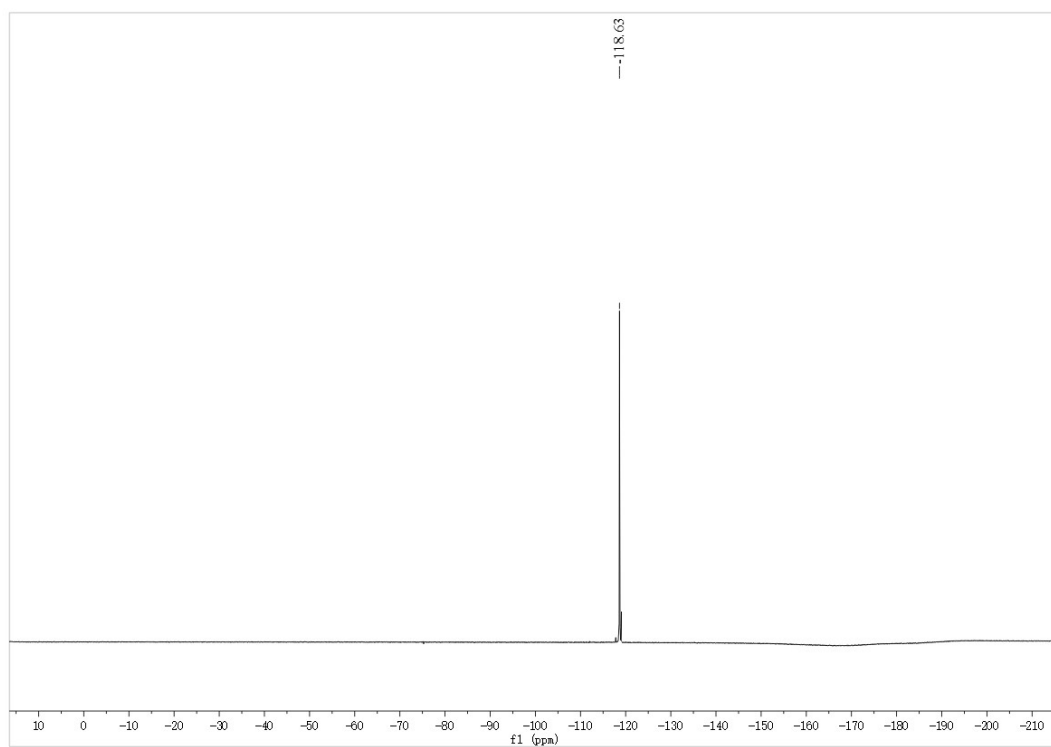

**$^1\text{H}$  and  $^{13}\text{C}$  NMR of 5c**



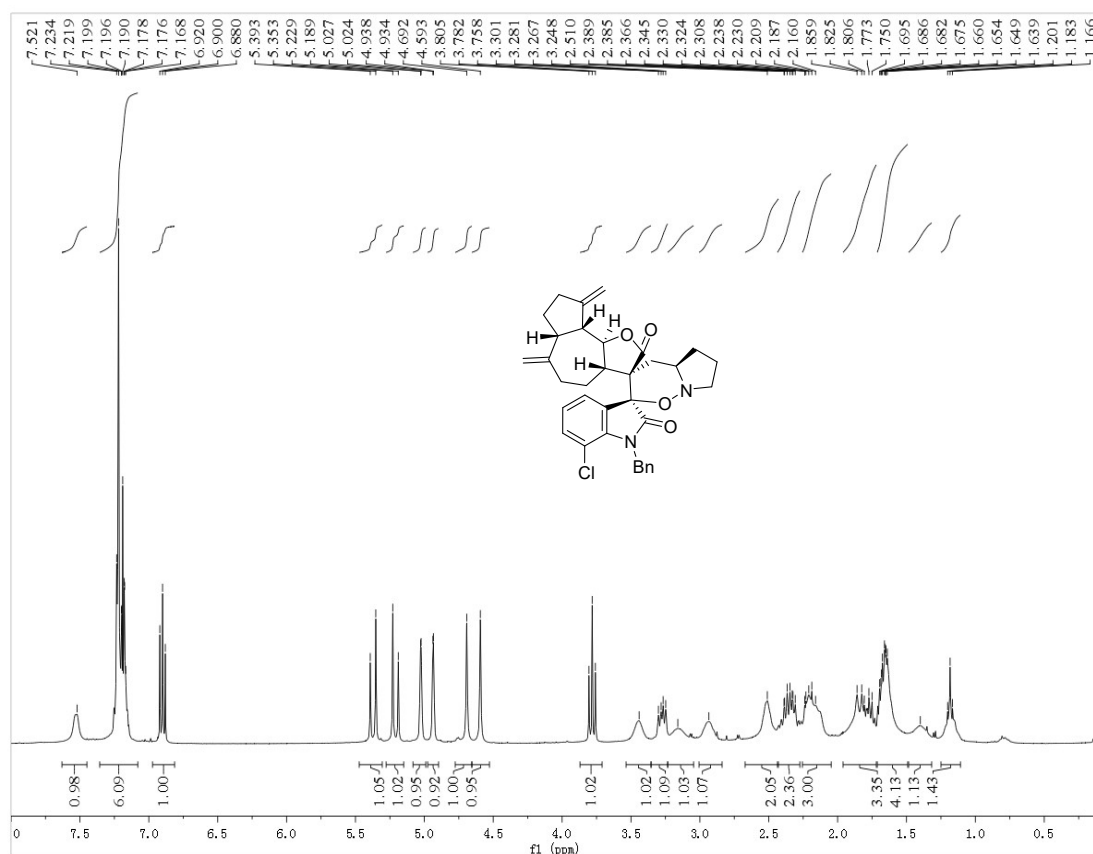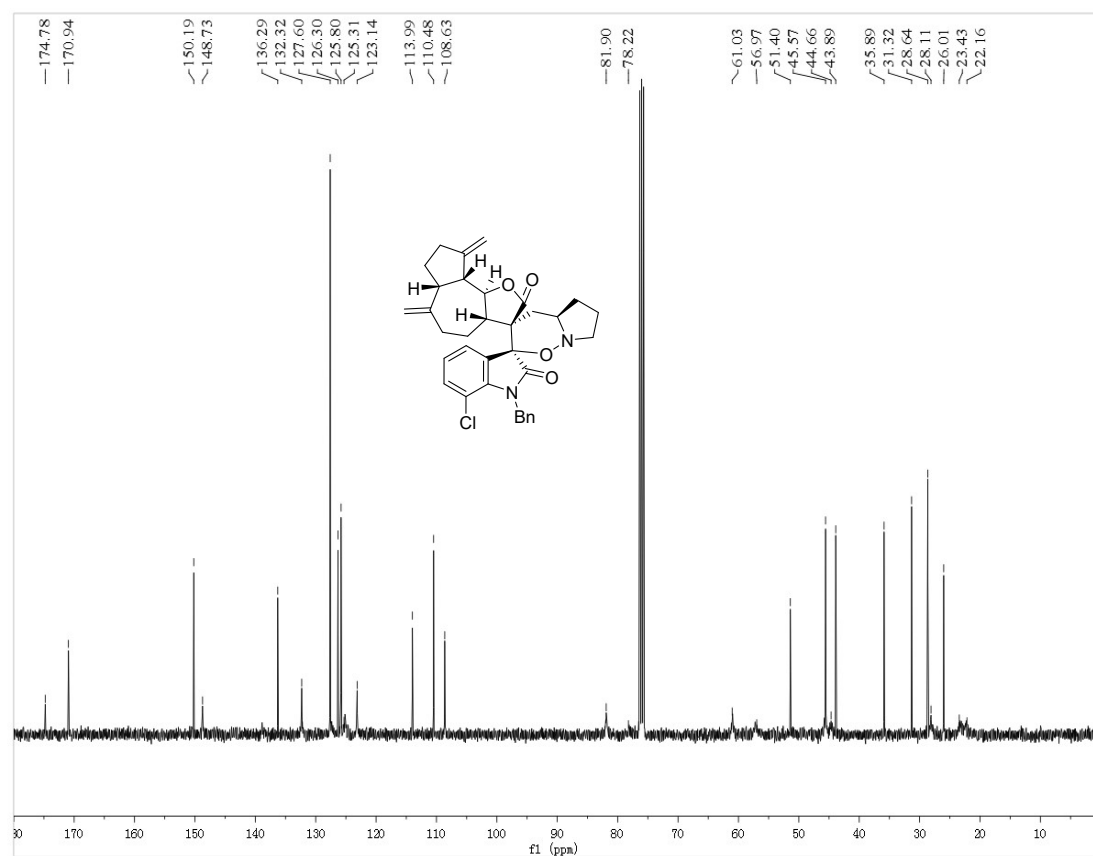

**<sup>1</sup>H and <sup>13</sup>C NMR of 6a**

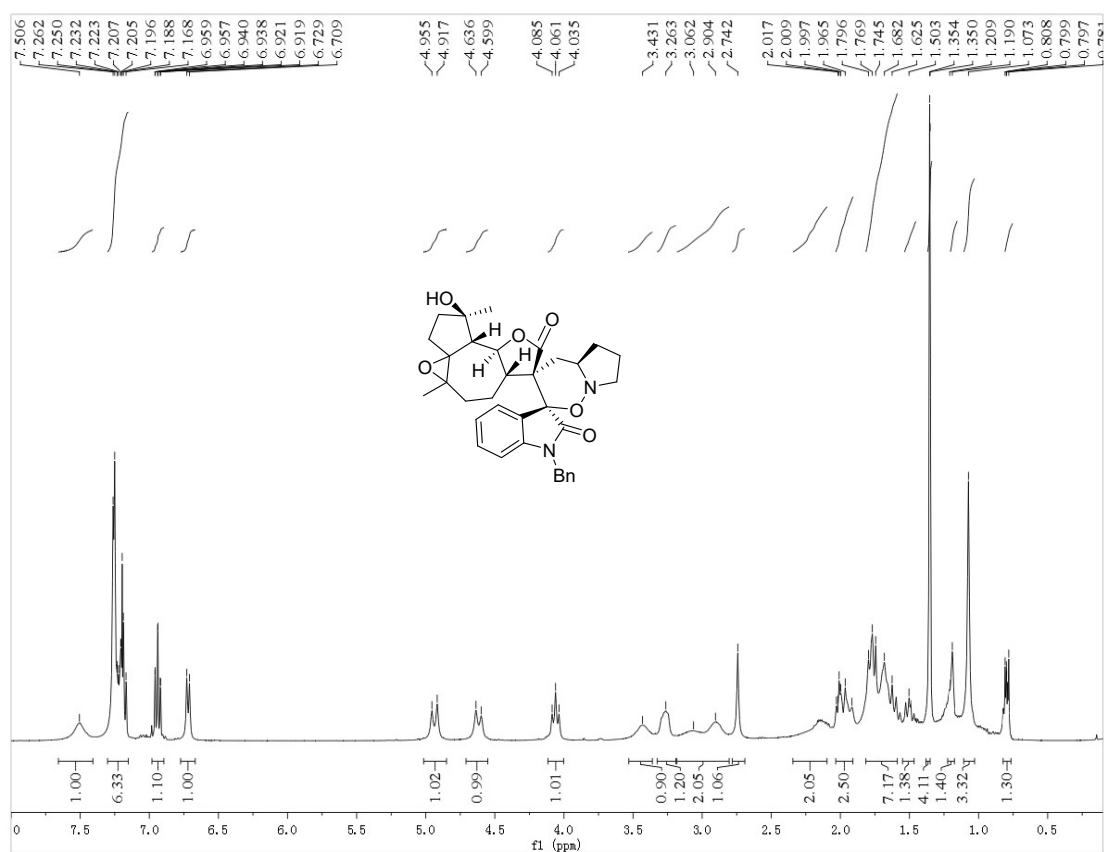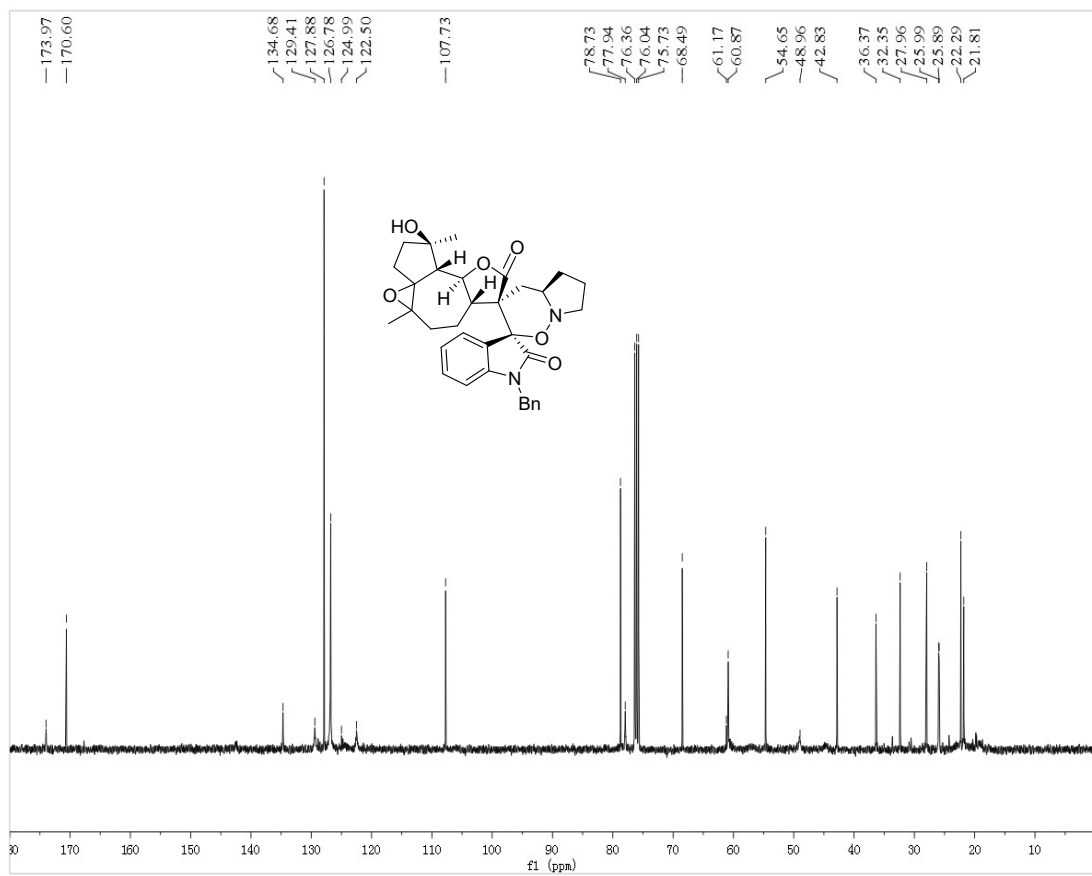

**<sup>1</sup>H and <sup>13</sup>C NMR of 6b**

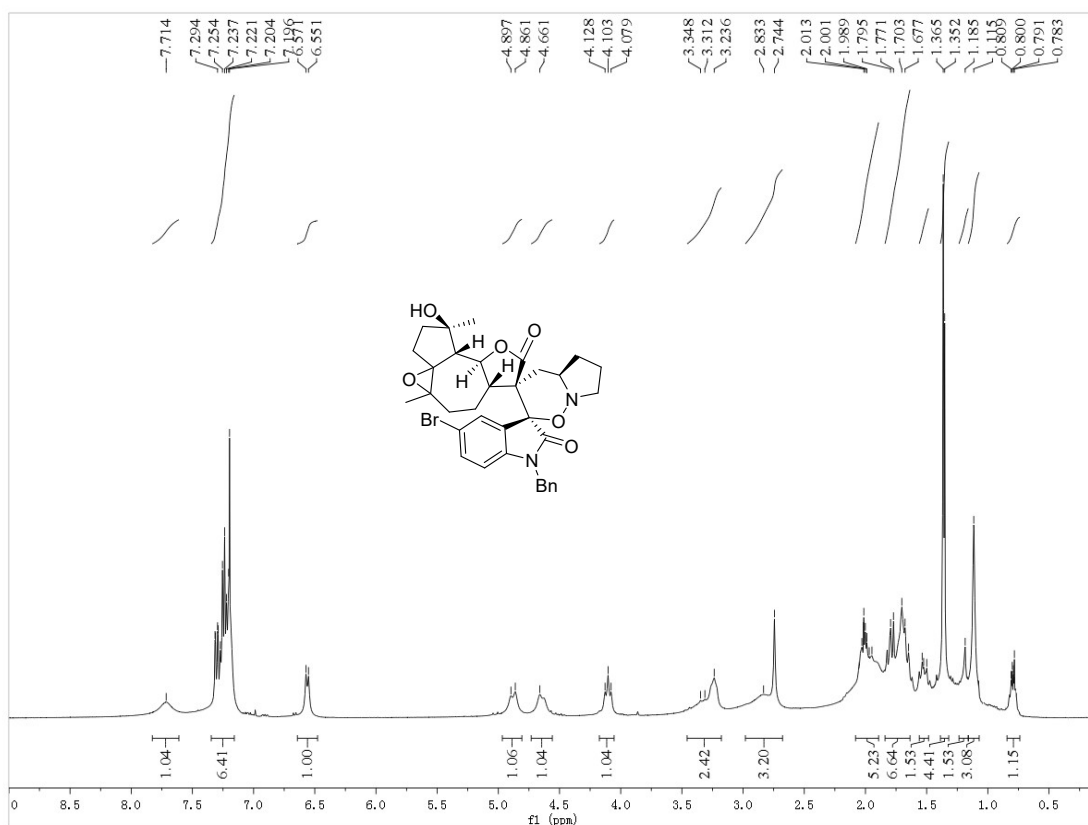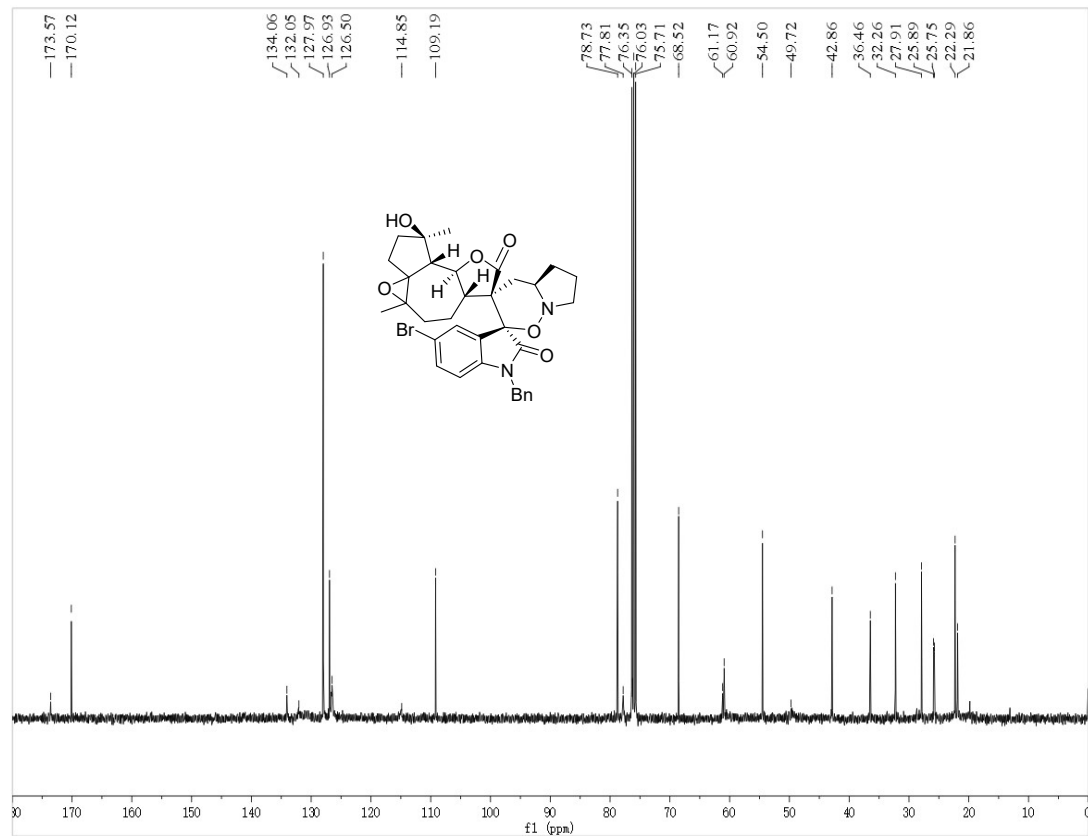

**<sup>1</sup>H and <sup>13</sup>C NMR of 6c**

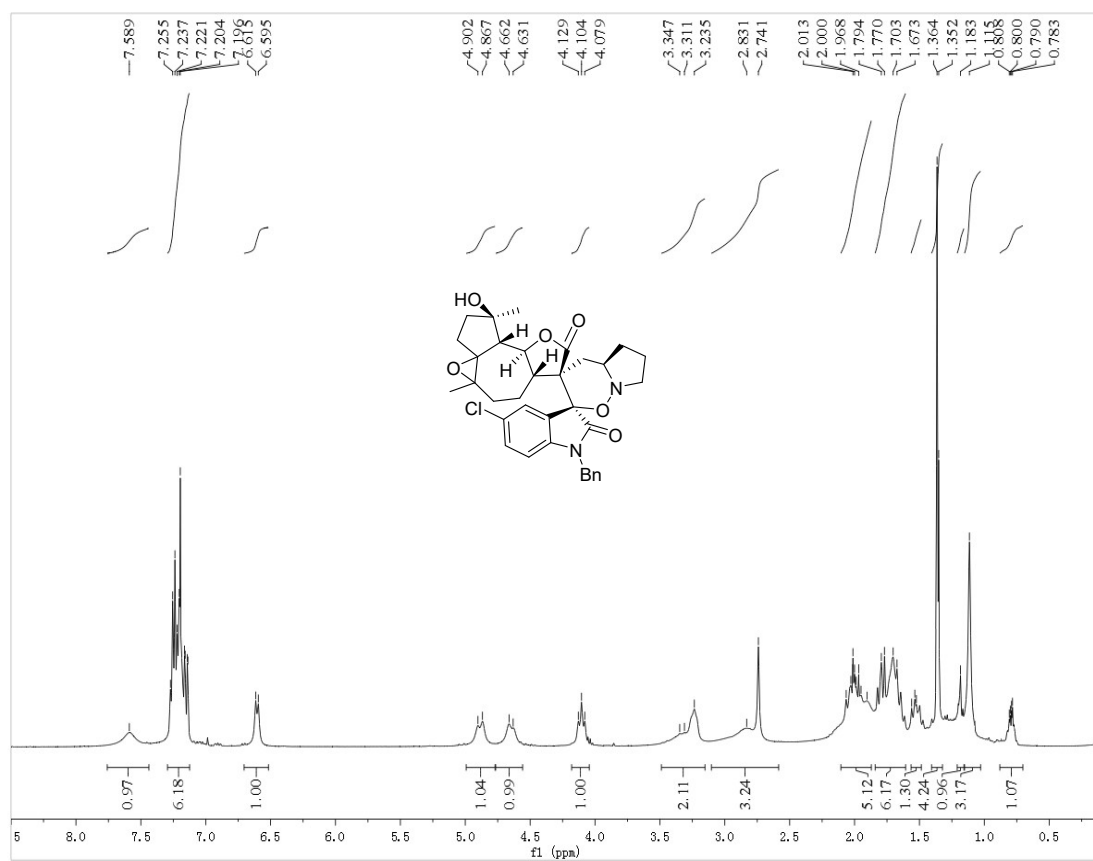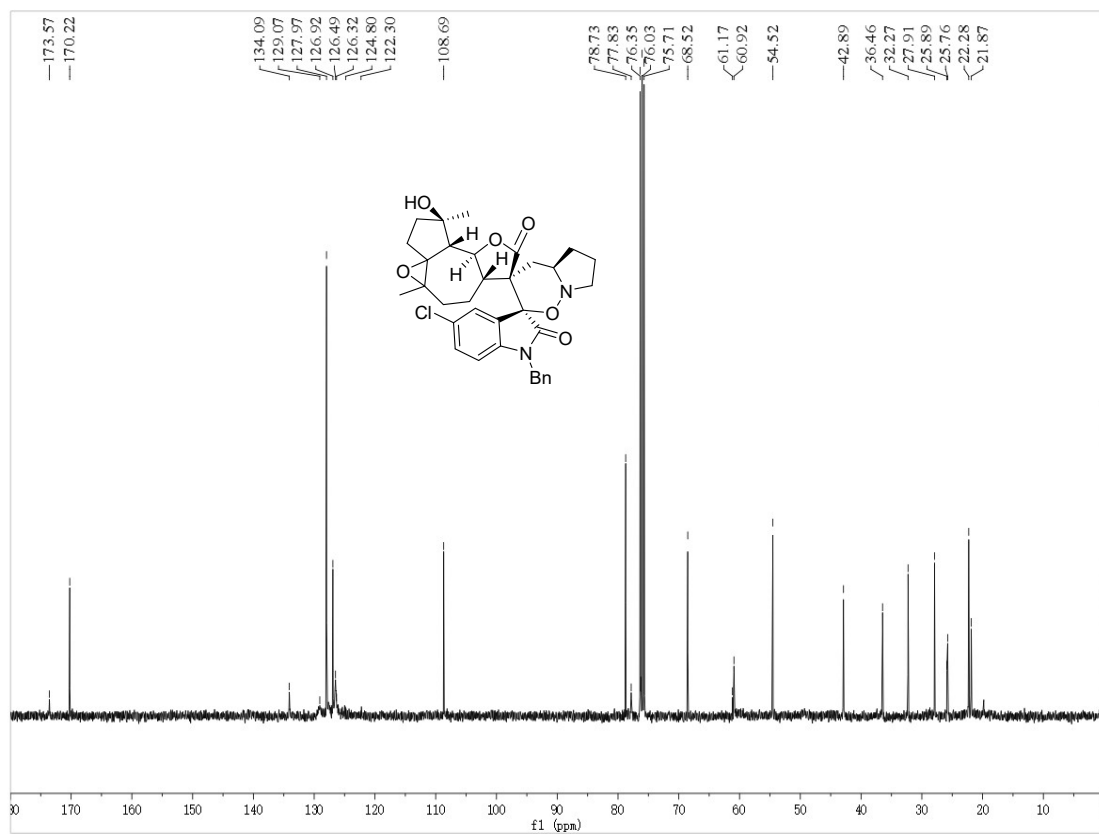

### <sup>1</sup>H and <sup>13</sup>C NMR of 7a

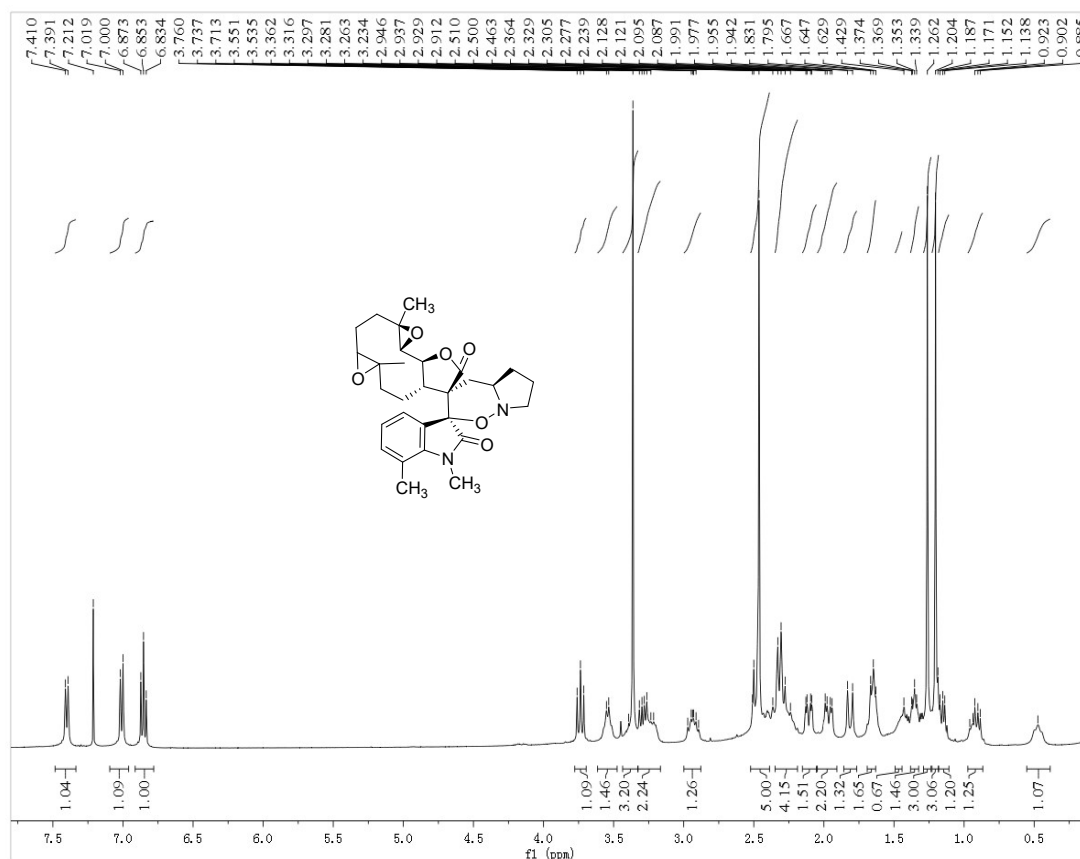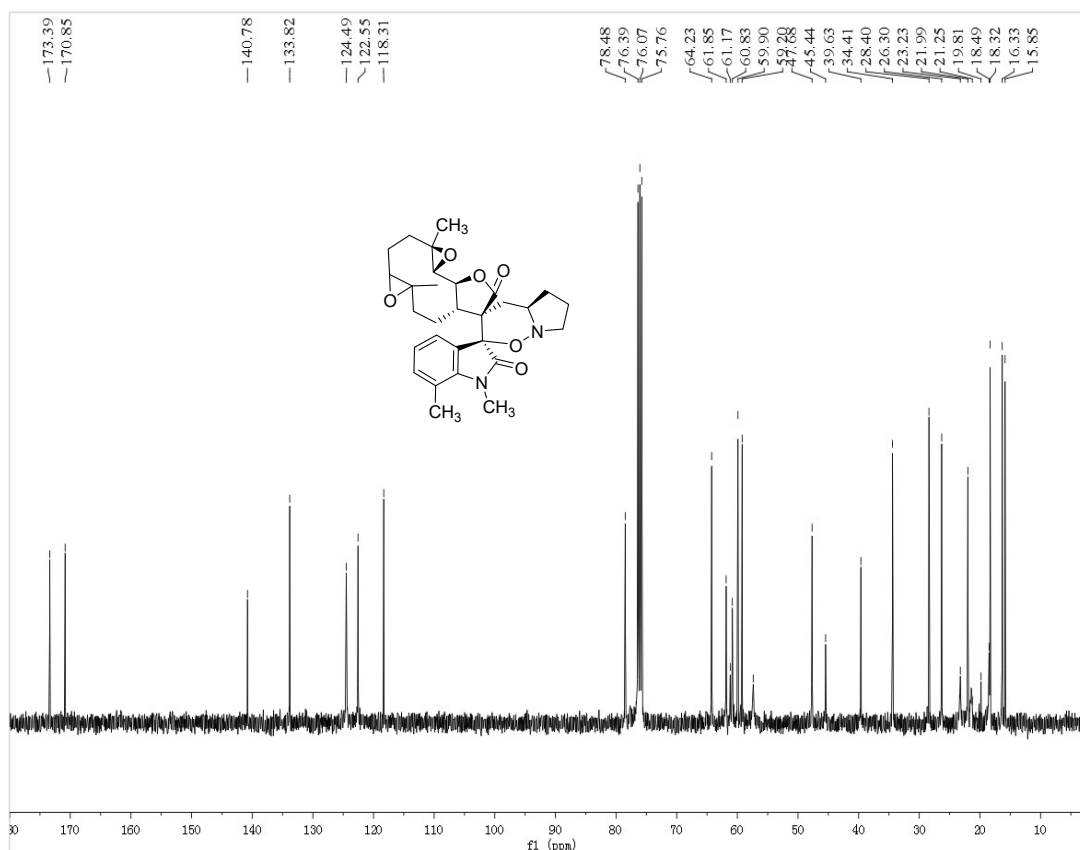

**<sup>1</sup>H and <sup>13</sup>C NMR of 7b**

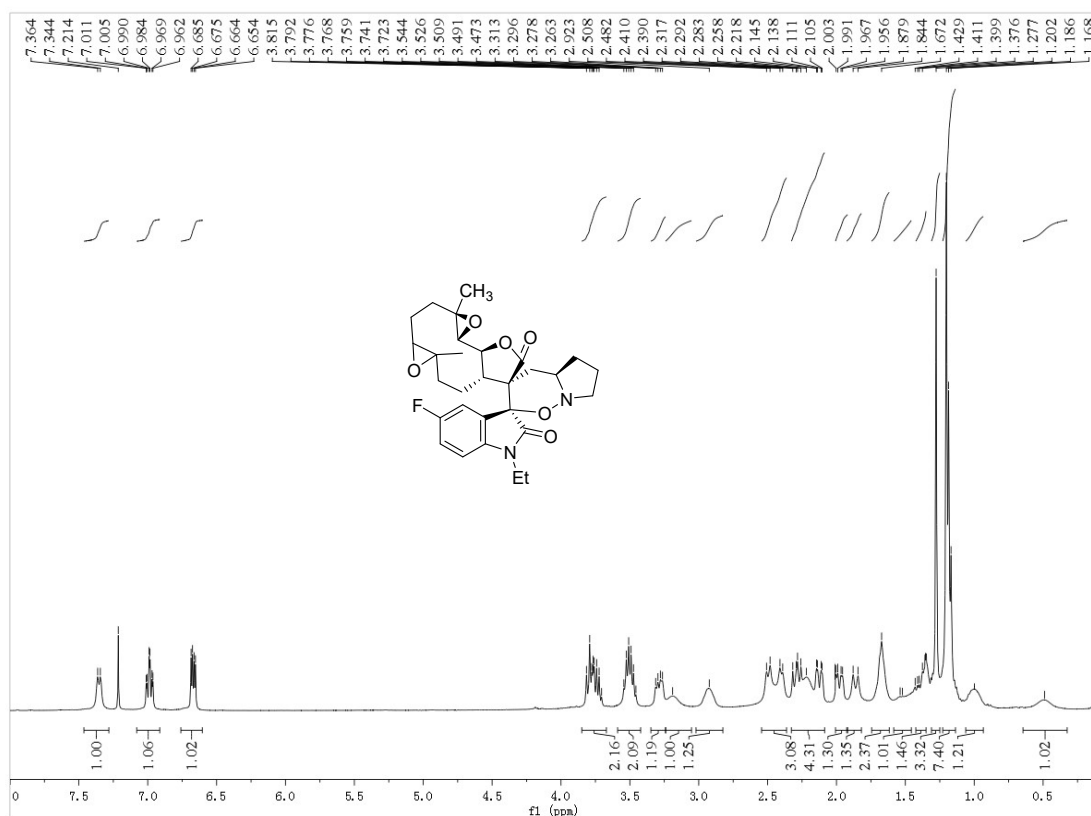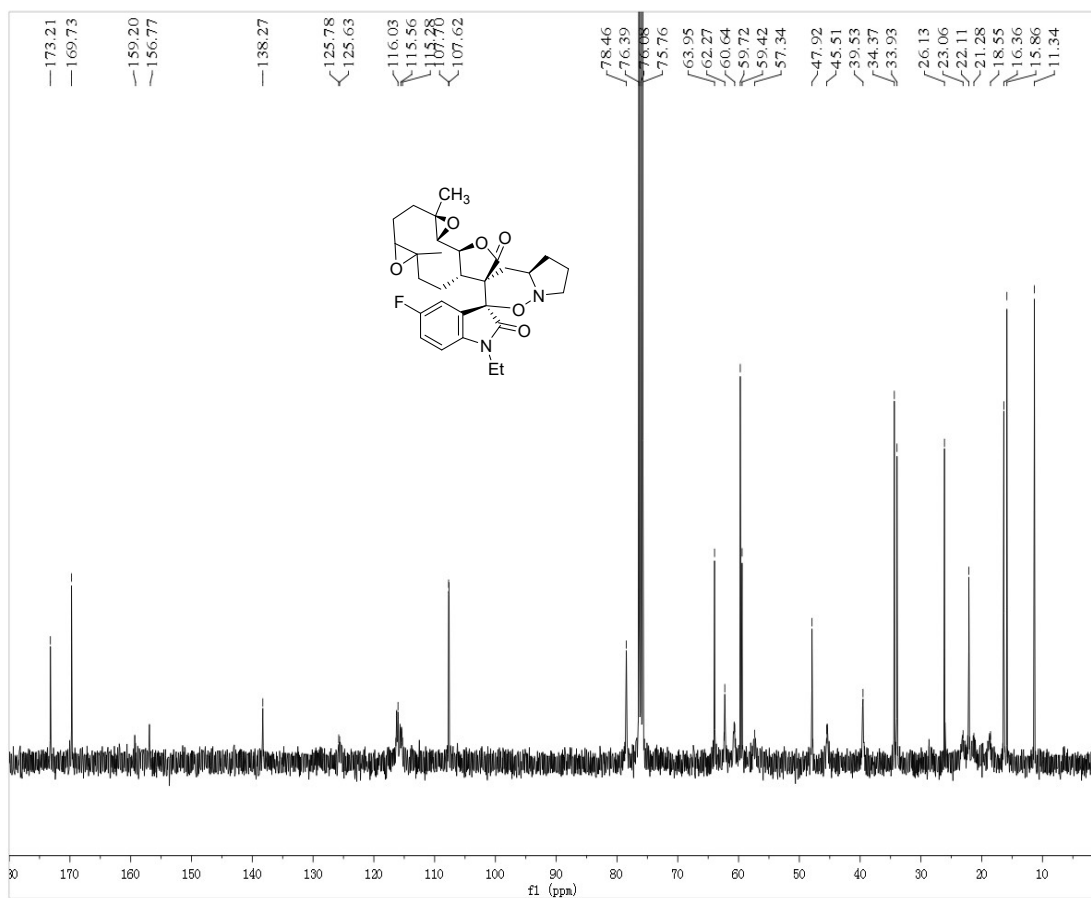

**<sup>1</sup>H and <sup>13</sup>C NMR of 7c**

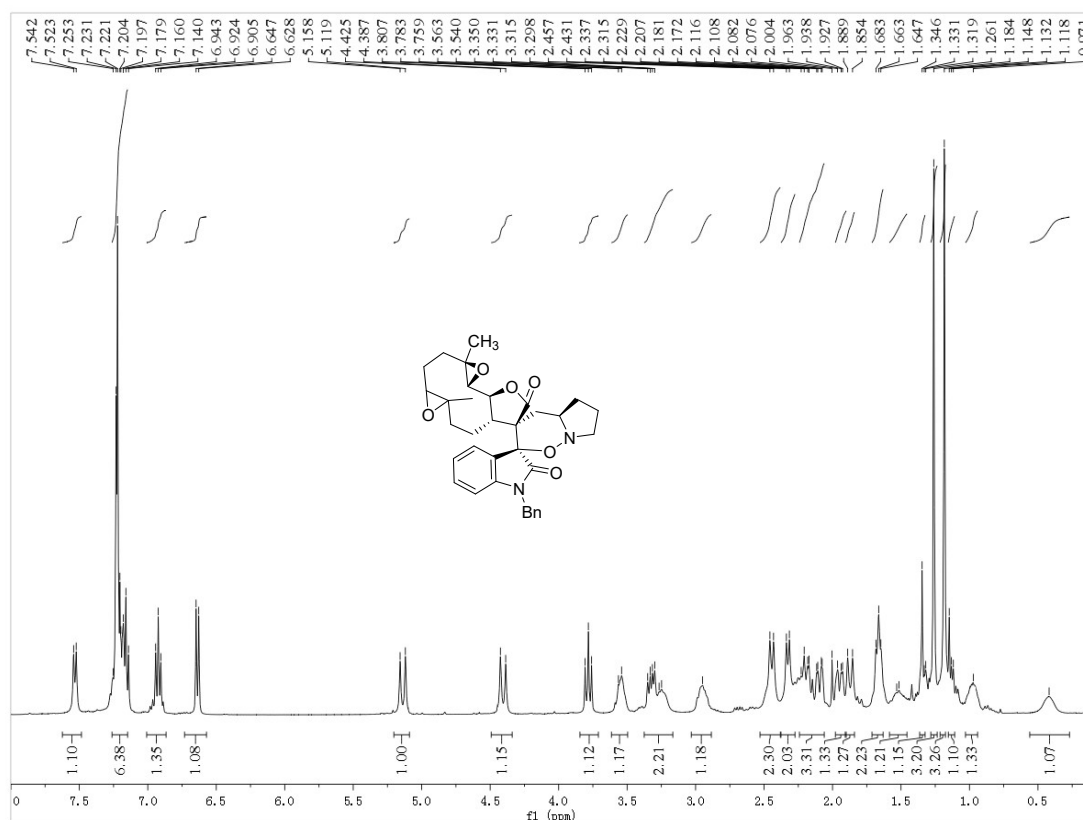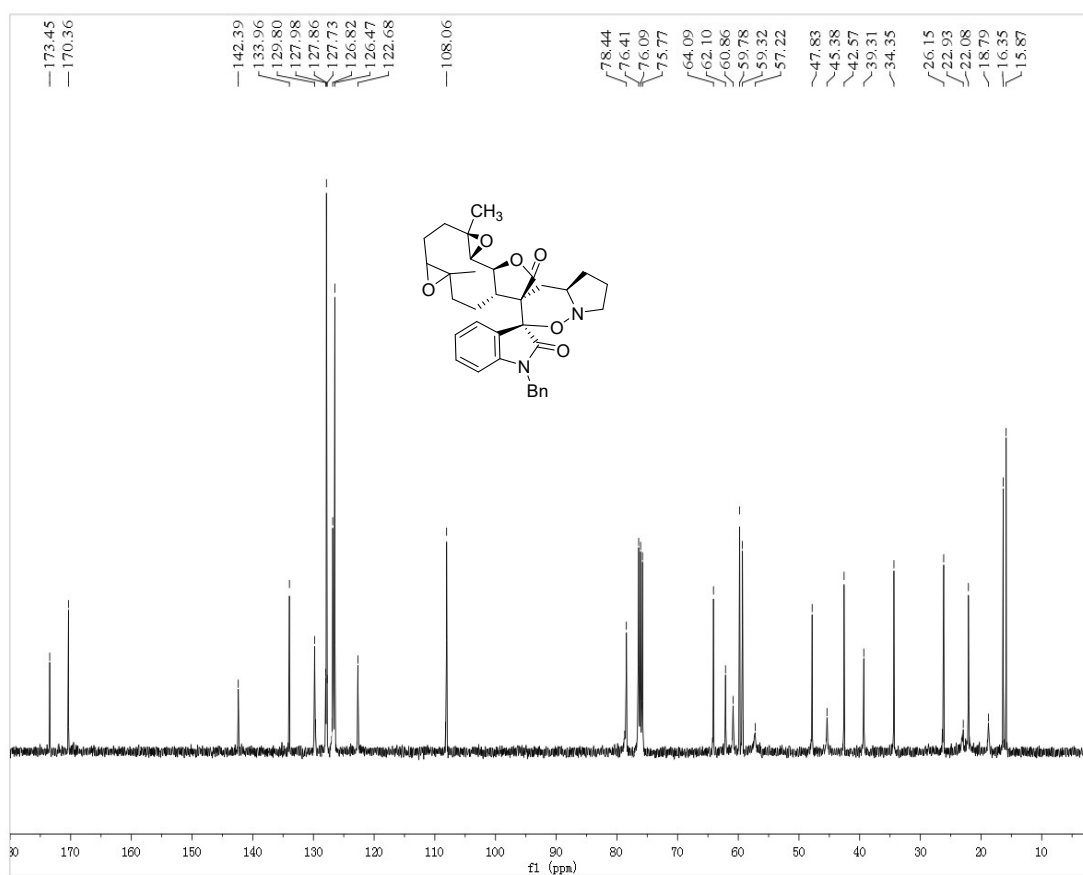

**<sup>1</sup>H and <sup>13</sup>C NMR of 7d**

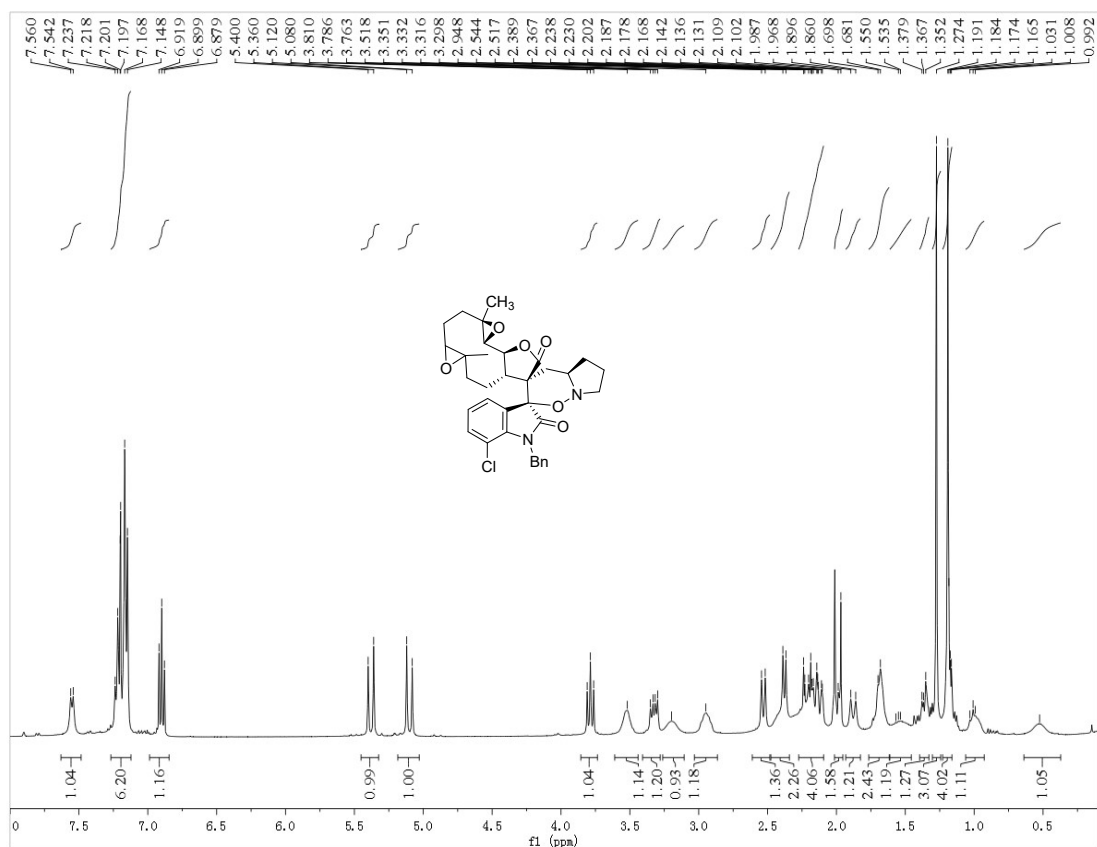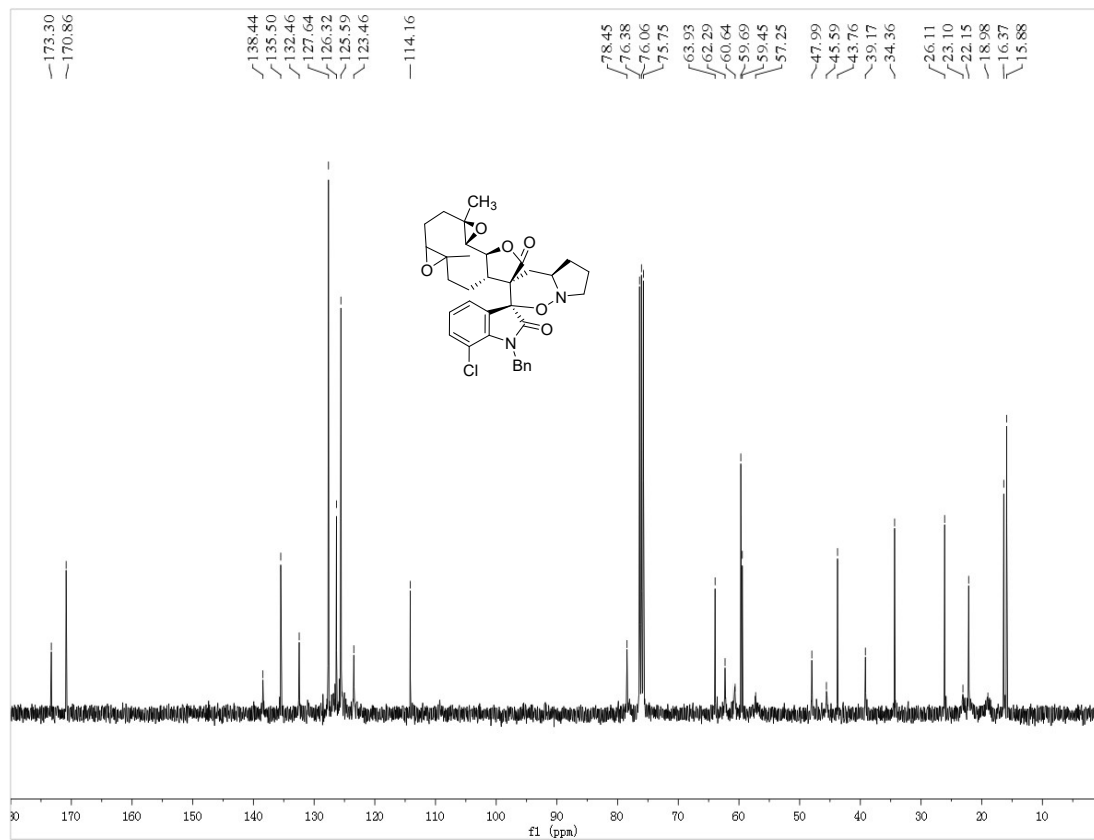

**<sup>1</sup>H and <sup>13</sup>C NMR of 7e**



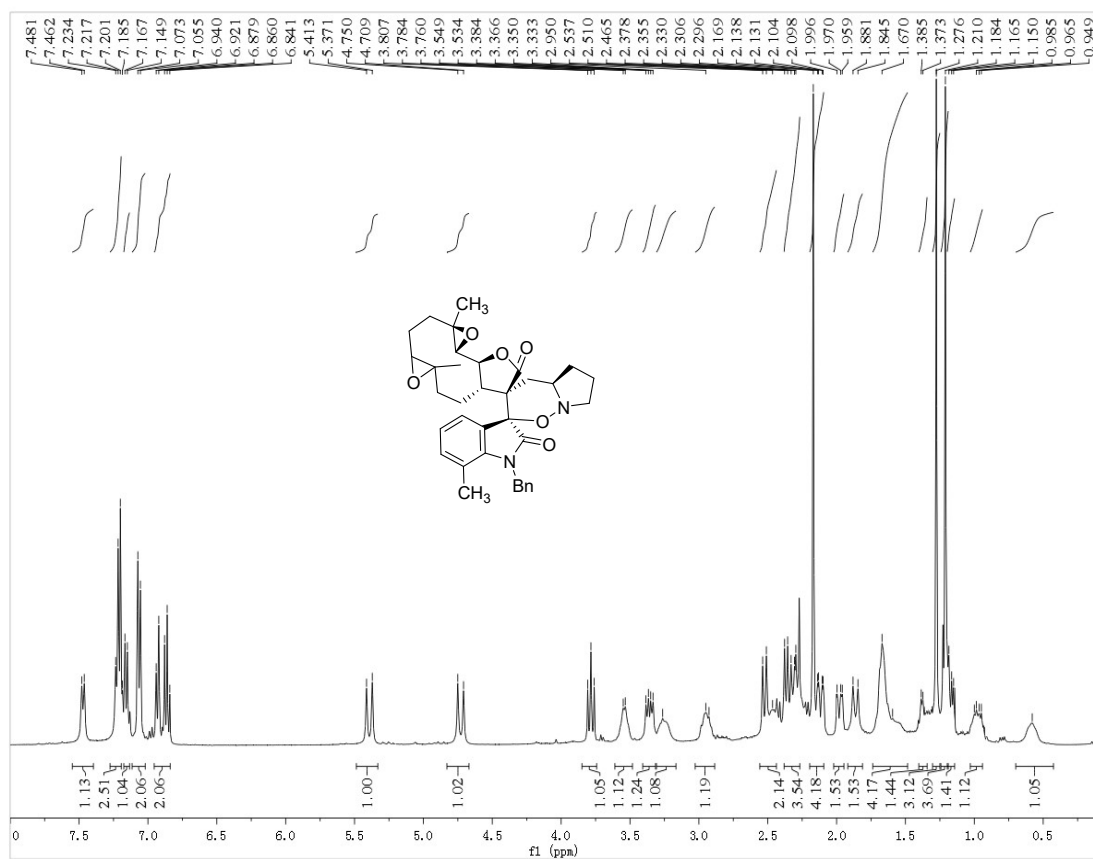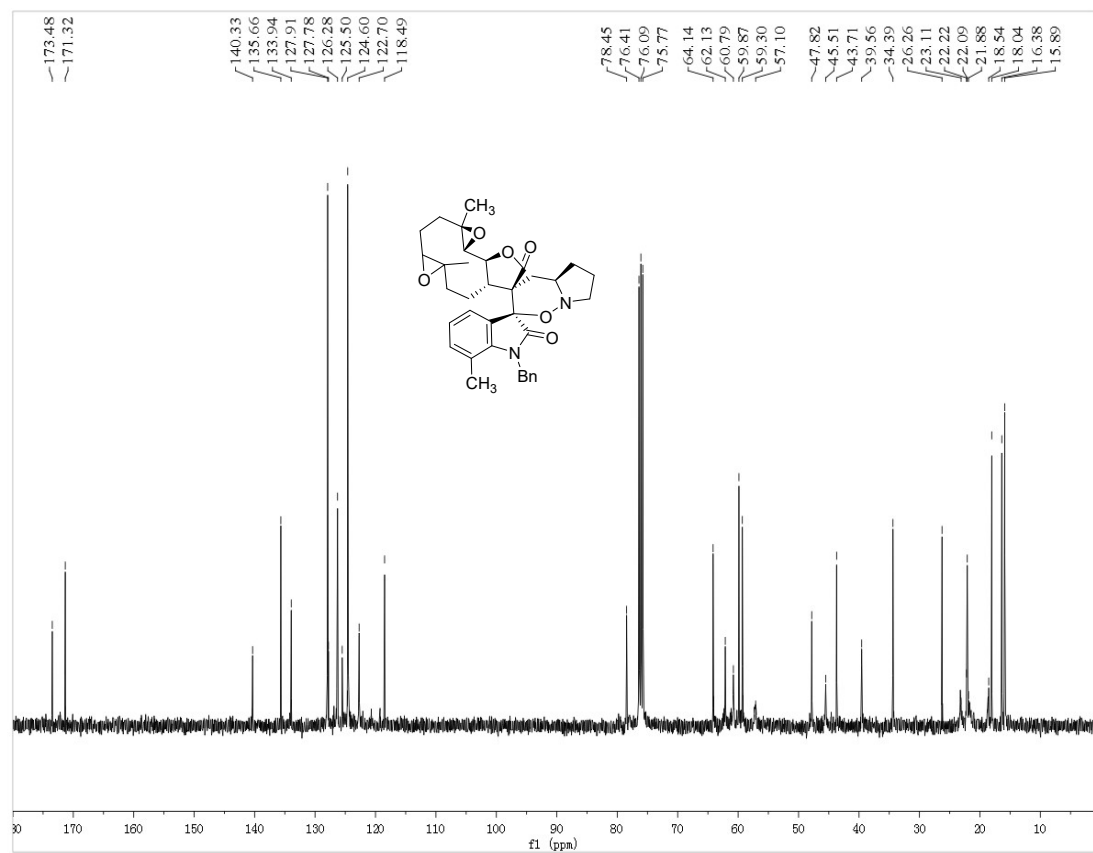

Supplement: d5nj04317d1.pdf [file d5nj04317d1.pdf]
